# Supplementary material for: CpG site methylation in CRYAA promoter affect transcription factor Sp1 binding in human lens epithelial cells
Source: BMC Ophthalmol. 2016 Aug 9;16:141. doi: 10.1186/s12886-016-0309-y (PMC4979130; doi:10.1186/s12886-016-0309-y)
Supplement: Additional file 4: — Row data of qRT-PCR for CRYAA after Zebularine treatment, Experiment 3. It is the rata data of the third experiment described above. (XLS 2630 kb) [file 12886_2016_309_MOESM4_ESM.xls]

## Sheet: Sample Setup
Block Type	96-Well Block (0.2mL)
Calibration Background is expired	No
Calibration Background performed on	2016-02-19 13:04:02 PM CST
Calibration FAM is expired	No
Calibration FAM performed on	2016-02-19 13:49:08 PM CST
Calibration NED is expired	No
Calibration NED performed on	2016-02-19 13:11:46 PM CST
Calibration ROI is expired	No
Calibration ROI performed on	2016-02-19 12:42:23 PM CST
Calibration ROX is expired	No
Calibration ROX performed on	2016-02-19 13:41:49 PM CST
Calibration SYBR is expired	No
Calibration SYBR performed on	2016-02-19 13:26:29 PM CST
Calibration TAMRA is expired	No
Calibration TAMRA performed on	2016-02-19 13:33:48 PM CST
Calibration Uniformity is expired	No
Calibration Uniformity performed on	2016-02-19 12:57:16 PM CST
Calibration VIC is expired	No
Calibration VIC performed on	2016-02-19 13:19:06 PM CST
Chemistry	SYBR_GREEN
Experiment Barcode
Experiment Comments
Experiment File Name	E:\科研\论文\CRYAA(EMSA)——J Ophthal\BMC\补实验\qRT-PCR实验\2016-04-29 121033LIUXIN.eds
Experiment Name	2016-04-29 121033LIUXIN
Experiment Run Start Time	2016-04-29 12:47:41 PM CST
Experiment Run Stop Time	2016-04-29 14:36:08 PM CST
Experiment Type	Comparative Cт (ΔΔCт)
Experiment User Name
Instrument Name	278881388
Instrument Serial Number	278881388
Instrument Type	ViiA(TM) 7 System
Passive Reference	ROX
Quantification Cycle Method	Ct
Signal Smoothing On	true
Stage/ Cycle where Analysis is performed	Stage 2, Step 2
Well	Well Position	Sample Name	Sample Color	Biogroup Name	Biogroup Color	Target Name	Target Color	Task	Reporter	Quencher	Quantity	Comments
1	A1	7	RGB(176,23,31)			CRYAA	RGB(176,23,31)	UNKNOWN	SYBR	None
2	A2	10	RGB(0,0,255)			CRYAA	RGB(176,23,31)	UNKNOWN	SYBR	None
3	A3	6	RGB(0,139,69)			CRYAA	RGB(176,23,31)	UNKNOWN	SYBR	None
4	A4	2	RGB(255,127,0)			CRYAA	RGB(176,23,31)	UNKNOWN	SYBR	None
5	A5	4	RGB(139,137,112)			CRYAA	RGB(176,23,31)	UNKNOWN	SYBR	None
6	A6	3	RGB(238,121,66)			CRYAA	RGB(176,23,31)	UNKNOWN	SYBR	None
7	A7	1	RGB(142,56,142)			CRYAA	RGB(176,23,31)	UNKNOWN	SYBR	None
8	A8	15	RGB(198,113,113)			CRYAA	RGB(176,23,31)	UNKNOWN	SYBR	None
9	A9	9	RGB(0,245,255)			CRYAA	RGB(176,23,31)	UNKNOWN	SYBR	None
10	A10	8	RGB(238,220,130)			CRYAA	RGB(176,23,31)	UNKNOWN	SYBR	None
11	A11	12	RGB(238,238,0)			CRYAA	RGB(176,23,31)	UNKNOWN	SYBR	None
12	A12	11	RGB(142,142,56)			CRYAA	RGB(176,23,31)	UNKNOWN	SYBR	None
13	B1	7	RGB(176,23,31)			CRYAA	RGB(176,23,31)	UNKNOWN	SYBR	None
14	B2	10	RGB(0,0,255)			CRYAA	RGB(176,23,31)	UNKNOWN	SYBR	None
15	B3	6	RGB(0,139,69)			CRYAA	RGB(176,23,31)	UNKNOWN	SYBR	None
16	B4	2	RGB(255,127,0)			CRYAA	RGB(176,23,31)	UNKNOWN	SYBR	None
17	B5	4	RGB(139,137,112)			CRYAA	RGB(176,23,31)	UNKNOWN	SYBR	None
18	B6	3	RGB(238,121,66)			CRYAA	RGB(176,23,31)	UNKNOWN	SYBR	None
19	B7	1	RGB(142,56,142)			CRYAA	RGB(176,23,31)	UNKNOWN	SYBR	None
20	B8	15	RGB(198,113,113)			CRYAA	RGB(176,23,31)	UNKNOWN	SYBR	None
21	B9	9	RGB(0,245,255)			CRYAA	RGB(176,23,31)	UNKNOWN	SYBR	None
22	B10	8	RGB(238,220,130)			CRYAA	RGB(176,23,31)	UNKNOWN	SYBR	None
23	B11	12	RGB(238,238,0)			CRYAA	RGB(176,23,31)	UNKNOWN	SYBR	None
24	B12	11	RGB(142,142,56)			CRYAA	RGB(176,23,31)	UNKNOWN	SYBR	None
25	C1	7	RGB(176,23,31)			CRYAA	RGB(176,23,31)	UNKNOWN	SYBR	None
26	C2	10	RGB(0,0,255)			CRYAA	RGB(176,23,31)	UNKNOWN	SYBR	None
27	C3	6	RGB(0,139,69)			CRYAA	RGB(176,23,31)	UNKNOWN	SYBR	None
28	C4	2	RGB(255,127,0)			CRYAA	RGB(176,23,31)	UNKNOWN	SYBR	None
29	C5	4	RGB(139,137,112)			CRYAA	RGB(176,23,31)	UNKNOWN	SYBR	None
30	C6	3	RGB(238,121,66)			CRYAA	RGB(176,23,31)	UNKNOWN	SYBR	None
31	C7	1	RGB(142,56,142)			CRYAA	RGB(176,23,31)	UNKNOWN	SYBR	None
32	C8	15	RGB(198,113,113)			CRYAA	RGB(176,23,31)	UNKNOWN	SYBR	None
33	C9	9	RGB(0,245,255)			CRYAA	RGB(176,23,31)	UNKNOWN	SYBR	None
34	C10	8	RGB(238,220,130)			CRYAA	RGB(176,23,31)	UNKNOWN	SYBR	None
35	C11	12	RGB(238,238,0)			CRYAA	RGB(176,23,31)	UNKNOWN	SYBR	None
36	C12	11	RGB(142,142,56)			CRYAA	RGB(176,23,31)	UNKNOWN	SYBR	None
37	D1	7	RGB(176,23,31)			beta-actin	RGB(0,0,255)	UNKNOWN	SYBR	None
38	D2	10	RGB(0,0,255)			beta-actin	RGB(0,0,255)	UNKNOWN	SYBR	None
39	D3	6	RGB(0,139,69)			beta-actin	RGB(0,0,255)	UNKNOWN	SYBR	None
40	D4	2	RGB(255,127,0)			beta-actin	RGB(0,0,255)	UNKNOWN	SYBR	None
41	D5	4	RGB(139,137,112)			beta-actin	RGB(0,0,255)	UNKNOWN	SYBR	None
42	D6	3	RGB(238,121,66)			beta-actin	RGB(0,0,255)	UNKNOWN	SYBR	None
43	D7	1	RGB(142,56,142)			beta-actin	RGB(0,0,255)	UNKNOWN	SYBR	None
44	D8	15	RGB(198,113,113)			beta-actin	RGB(0,0,255)	UNKNOWN	SYBR	None
45	D9	9	RGB(0,245,255)			beta-actin	RGB(0,0,255)	UNKNOWN	SYBR	None
46	D10	8	RGB(238,220,130)			beta-actin	RGB(0,0,255)	UNKNOWN	SYBR	None
47	D11	12	RGB(238,238,0)			beta-actin	RGB(0,0,255)	UNKNOWN	SYBR	None
48	D12	11	RGB(142,142,56)			beta-actin	RGB(0,0,255)	UNKNOWN	SYBR	None
49	E1	7	RGB(176,23,31)			beta-actin	RGB(0,0,255)	UNKNOWN	SYBR	None
50	E2	10	RGB(0,0,255)			beta-actin	RGB(0,0,255)	UNKNOWN	SYBR	None
51	E3	6	RGB(0,139,69)			beta-actin	RGB(0,0,255)	UNKNOWN	SYBR	None
52	E4	2	RGB(255,127,0)			beta-actin	RGB(0,0,255)	UNKNOWN	SYBR	None
53	E5	4	RGB(139,137,112)			beta-actin	RGB(0,0,255)	UNKNOWN	SYBR	None
54	E6	3	RGB(238,121,66)			beta-actin	RGB(0,0,255)	UNKNOWN	SYBR	None
55	E7	1	RGB(142,56,142)			beta-actin	RGB(0,0,255)	UNKNOWN	SYBR	None
56	E8	15	RGB(198,113,113)			beta-actin	RGB(0,0,255)	UNKNOWN	SYBR	None
57	E9	9	RGB(0,245,255)			beta-actin	RGB(0,0,255)	UNKNOWN	SYBR	None
58	E10	8	RGB(238,220,130)			beta-actin	RGB(0,0,255)	UNKNOWN	SYBR	None
59	E11	12	RGB(238,238,0)			beta-actin	RGB(0,0,255)	UNKNOWN	SYBR	None
60	E12	11	RGB(142,142,56)			beta-actin	RGB(0,0,255)	UNKNOWN	SYBR	None
61	F1	13	RGB(238,44,44)			CRYAA	RGB(176,23,31)	UNKNOWN	SYBR	None
62	F2	14	RGB(51,161,201)			CRYAA	RGB(176,23,31)	UNKNOWN	SYBR	None
63	F3	5	RGB(238,18,137)			CRYAA	RGB(176,23,31)	UNKNOWN	SYBR	None
64	F4	16	RGB(176,23,31)			CRYAA	RGB(176,23,31)	UNKNOWN	SYBR	None
65	F5	17	RGB(0,0,255)			CRYAA	RGB(176,23,31)	UNKNOWN	SYBR	None
66	F6	18	RGB(0,139,69)			CRYAA	RGB(176,23,31)	UNKNOWN	SYBR	None
67	F7	13	RGB(238,44,44)			beta-actin	RGB(0,0,255)	UNKNOWN	SYBR	None
68	F8	14	RGB(51,161,201)			beta-actin	RGB(0,0,255)	UNKNOWN	SYBR	None
69	F9	5	RGB(238,18,137)			beta-actin	RGB(0,0,255)	UNKNOWN	SYBR	None
70	F10	16	RGB(176,23,31)			beta-actin	RGB(0,0,255)	UNKNOWN	SYBR	None
71	F11	17	RGB(0,0,255)			beta-actin	RGB(0,0,255)	UNKNOWN	SYBR	None
72	F12	18	RGB(0,139,69)			beta-actin	RGB(0,0,255)	UNKNOWN	SYBR	None
73	G1	13	RGB(238,44,44)			CRYAA	RGB(176,23,31)	UNKNOWN	SYBR	None
74	G2	14	RGB(51,161,201)			CRYAA	RGB(176,23,31)	UNKNOWN	SYBR	None
75	G3	5	RGB(238,18,137)			CRYAA	RGB(176,23,31)	UNKNOWN	SYBR	None
76	G4	16	RGB(176,23,31)			CRYAA	RGB(176,23,31)	UNKNOWN	SYBR	None
77	G5	17	RGB(0,0,255)			CRYAA	RGB(176,23,31)	UNKNOWN	SYBR	None
78	G6	18	RGB(0,139,69)			CRYAA	RGB(176,23,31)	UNKNOWN	SYBR	None
79	G7	13	RGB(238,44,44)			beta-actin	RGB(0,0,255)	UNKNOWN	SYBR	None
80	G8	14	RGB(51,161,201)			beta-actin	RGB(0,0,255)	UNKNOWN	SYBR	None
81	G9	5	RGB(238,18,137)			beta-actin	RGB(0,0,255)	UNKNOWN	SYBR	None
82	G10	16	RGB(176,23,31)			beta-actin	RGB(0,0,255)	UNKNOWN	SYBR	None
83	G11	17	RGB(0,0,255)			beta-actin	RGB(0,0,255)	UNKNOWN	SYBR	None
84	G12	18	RGB(0,139,69)			beta-actin	RGB(0,0,255)	UNKNOWN	SYBR	None
85	H1	13	RGB(238,44,44)			CRYAA	RGB(176,23,31)	UNKNOWN	SYBR	None
86	H2	14	RGB(51,161,201)			CRYAA	RGB(176,23,31)	UNKNOWN	SYBR	None
87	H3	5	RGB(238,18,137)			CRYAA	RGB(176,23,31)	UNKNOWN	SYBR	None
88	H4	16	RGB(176,23,31)			CRYAA	RGB(176,23,31)	UNKNOWN	SYBR	None
89	H5	17	RGB(0,0,255)			CRYAA	RGB(176,23,31)	UNKNOWN	SYBR	None
90	H6	18	RGB(0,139,69)			CRYAA	RGB(176,23,31)	UNKNOWN	SYBR	None
91	H7	13	RGB(238,44,44)			beta-actin	RGB(0,0,255)	UNKNOWN	SYBR	None
92	H8	14	RGB(51,161,201)			beta-actin	RGB(0,0,255)	UNKNOWN	SYBR	None
93	H9	5	RGB(238,18,137)			beta-actin	RGB(0,0,255)	UNKNOWN	SYBR	None
94	H10	16	RGB(176,23,31)			beta-actin	RGB(0,0,255)	UNKNOWN	SYBR	None
95	H11	17	RGB(0,0,255)			beta-actin	RGB(0,0,255)	UNKNOWN	SYBR	None
96	H12	18	RGB(0,139,69)			beta-actin	RGB(0,0,255)	UNKNOWN	SYBR	None

## Sheet: Amplification Data
Block Type	96-Well Block (0.2mL)
Calibration Background is expired	No
Calibration Background performed on	2016-02-19 13:04:02 PM CST
Calibration FAM is expired	No
Calibration FAM performed on	2016-02-19 13:49:08 PM CST
Calibration NED is expired	No
Calibration NED performed on	2016-02-19 13:11:46 PM CST
Calibration ROI is expired	No
Calibration ROI performed on	2016-02-19 12:42:23 PM CST
Calibration ROX is expired	No
Calibration ROX performed on	2016-02-19 13:41:49 PM CST
Calibration SYBR is expired	No
Calibration SYBR performed on	2016-02-19 13:26:29 PM CST
Calibration TAMRA is expired	No
Calibration TAMRA performed on	2016-02-19 13:33:48 PM CST
Calibration Uniformity is expired	No
Calibration Uniformity performed on	2016-02-19 12:57:16 PM CST
Calibration VIC is expired	No
Calibration VIC performed on	2016-02-19 13:19:06 PM CST
Chemistry	SYBR_GREEN
Experiment Barcode
Experiment Comments
Experiment File Name	E:\科研\论文\CRYAA(EMSA)——J Ophthal\BMC\补实验\qRT-PCR实验\2016-04-29 121033LIUXIN.eds
Experiment Name	2016-04-29 121033LIUXIN
Experiment Run Start Time	2016-04-29 12:47:41 PM CST
Experiment Run Stop Time	2016-04-29 14:36:08 PM CST
Experiment Type	Comparative Cт (ΔΔCт)
Experiment User Name
Instrument Name	278881388
Instrument Serial Number	278881388
Instrument Type	ViiA(TM) 7 System
Passive Reference	ROX
Quantification Cycle Method	Ct
Signal Smoothing On	true
Stage/ Cycle where Analysis is performed	Stage 2, Step 2
Well	Cycle	Target Name	Rn	Delta Rn
1	1	CRYAA	0.0180131	-0.00533437
1	2	CRYAA	0.019617	-0.00435921
1	3	CRYAA	0.0224379	-0.00216703
1	4	CRYAA	0.023959	-0.00127473
1	5	CRYAA	0.0251878	-0.000674601
1	6	CRYAA	0.0274231	0.000931925
1	7	CRYAA	0.0277561	0.000636118
1	8	CRYAA	0.0277998	5.10996e-05
1	9	CRYAA	0.028875	0.00049757
1	10	CRYAA	0.0293736	0.000367452
1	11	CRYAA	0.030132	0.000497103
1	12	CRYAA	0.0310192	0.000755586
1	13	CRYAA	0.0318934	0.00100105
1	14	CRYAA	0.032495	0.000973811
1	15	CRYAA	0.0327378	0.000587952
1	16	CRYAA	0.0330627	0.000284046
1	17	CRYAA	0.0334419	3.45334e-05
1	18	CRYAA	0.0343552	0.000319071
1	19	CRYAA	0.035326	0.000661126
1	20	CRYAA	0.0358764	0.000582765
1	21	CRYAA	0.0363335	0.000411196
1	22	CRYAA	0.0361927	-0.000358401
1	23	CRYAA	0.0361057	-0.00107414
1	24	CRYAA	0.0361303	-0.00167832
1	25	CRYAA	0.0371327	-0.00130462
1	26	CRYAA	0.0379166	-0.00114946
1	27	CRYAA	0.0384223	-0.00127252
1	28	CRYAA	0.0393003	-0.0010233
1	29	CRYAA	0.0414734	0.000521126
1	30	CRYAA	0.0444446	0.0028636
1	31	CRYAA	0.0503448	0.00813503
1	32	CRYAA	0.0608359	0.0179974
1	33	CRYAA	0.0813895	0.0379222
1	34	CRYAA	0.12045	0.0763541
1	35	CRYAA	0.19083	0.146105
1	36	CRYAA	0.305326	0.259972
1	37	CRYAA	0.452523	0.406541
1	38	CRYAA	0.598939	0.552328
1	39	CRYAA	0.71421	0.666971
1	40	CRYAA	0.786178	0.738309
2	1	CRYAA	-0.0168826	-0.00370247
2	2	CRYAA	-0.0166798	-0.00385774
2	3	CRYAA	-0.015404	-0.00293995
2	4	CRYAA	-0.0120213	8.46888e-05
2	5	CRYAA	-0.0109793	0.000768635
2	6	CRYAA	-0.010524	0.000865929
2	7	CRYAA	-0.0102214	0.000810531
2	8	CRYAA	-0.00976132	0.000912536
2	9	CRYAA	-0.00958186	0.000733963
2	10	CRYAA	-0.00945598	0.000501815
2	11	CRYAA	-0.00915584	0.000443914
2	12	CRYAA	-0.0087694	0.000472325
2	13	CRYAA	-0.00865912	0.000224578
2	14	CRYAA	-0.00827102	0.000254642
2	15	CRYAA	-0.00810118	6.64448e-05
2	16	CRYAA	-0.00758642	0.000223176
2	17	CRYAA	-0.00760635	-0.000154784
2	18	CRYAA	-0.00764907	-0.00055554
2	19	CRYAA	-0.00745334	-0.00071784
2	20	CRYAA	-0.0064804	-0.000102931
2	21	CRYAA	-0.00652656	-0.000507125
2	22	CRYAA	-0.0065934	-0.000932
2	23	CRYAA	-0.00593162	-0.000628254
2	24	CRYAA	-0.00574966	-0.000804328
2	25	CRYAA	-0.00569827	-0.00111097
2	26	CRYAA	-0.00490885	-0.000679585
2	27	CRYAA	-0.00482245	-0.000951212
2	28	CRYAA	-0.0044342	-0.000921001
2	29	CRYAA	-0.00338977	-0.000234605
2	30	CRYAA	-0.00180699	0.000990145
2	31	CRYAA	0.0014477	0.00388681
2	32	CRYAA	0.00707534	0.00915642
2	33	CRYAA	0.0178173	0.0195403
2	34	CRYAA	0.0381963	0.0395613
2	35	CRYAA	0.0763422	0.0773492
2	36	CRYAA	0.147057	0.147706
2	37	CRYAA	0.264952	0.265243
2	38	CRYAA	0.424278	0.424211
2	39	CRYAA	0.590911	0.590486
2	40	CRYAA	0.714433	0.713649
3	1	CRYAA	-0.0170651	-0.00037431
3	2	CRYAA	-0.0168658	-0.000435581
3	3	CRYAA	-0.0163557	-0.000186059
3	4	CRYAA	-0.0157118	0.000197251
3	5	CRYAA	-0.0151443	0.000504184
3	6	CRYAA	-0.0150827	0.000305245
3	7	CRYAA	-0.0149712	0.000156113
3	8	CRYAA	-0.0147038	0.000162954
3	9	CRYAA	-0.0144008	0.000205422
3	10	CRYAA	-0.014112	0.000233567
3	11	CRYAA	-0.0138573	0.000227758
3	12	CRYAA	-0.0137961	2.83129e-05
3	13	CRYAA	-0.0135341	2.97614e-05
3	14	CRYAA	-0.0133346	-3.1295e-05
3	15	CRYAA	-0.0133911	-0.000348409
3	16	CRYAA	-0.0132664	-0.000484294
3	17	CRYAA	-0.0127208	-0.000199256
3	18	CRYAA	-0.0123082	-4.71927e-05
3	19	CRYAA	-0.0120592	-5.88414e-05
3	20	CRYAA	-0.0120134	-0.000273562
3	21	CRYAA	-0.0120329	-0.000553624
3	22	CRYAA	-0.011635	-0.000416326
3	23	CRYAA	-0.0113601	-0.000401993
3	24	CRYAA	-0.0112208	-0.000523282
3	25	CRYAA	-0.0110439	-0.000606939
3	26	CRYAA	-0.0108765	-0.000700138
3	27	CRYAA	-0.0107902	-0.00087444
3	28	CRYAA	-0.00992854	-0.000273315
3	29	CRYAA	-0.00861526	0.000779384
3	30	CRYAA	-0.00598505	0.00314901
3	31	CRYAA	-0.001394	0.00747949
3	32	CRYAA	0.00778547	0.0163984
3	33	CRYAA	0.0258266	0.0341789
3	34	CRYAA	0.0595807	0.0676724
3	35	CRYAA	0.121025	0.128856
3	36	CRYAA	0.225291	0.232862
3	37	CRYAA	0.381694	0.389004
3	38	CRYAA	0.573801	0.58085
3	39	CRYAA	0.743889	0.750678
3	40	CRYAA	0.826284	0.832812
4	1	CRYAA	-0.0152286	-0.000958775
4	2	CRYAA	-0.0148036	-0.0007652
4	3	CRYAA	-0.0139328	-0.000125827
4	4	CRYAA	-0.0134372	0.000138379
4	5	CRYAA	-0.0129994	0.000344839
4	6	CRYAA	-0.0129133	0.000199519
4	7	CRYAA	-0.0125254	0.00035606
4	8	CRYAA	-0.0120195	0.000630497
4	9	CRYAA	-0.0119409	0.000477773
4	10	CRYAA	-0.0117851	0.000402128
4	11	CRYAA	-0.0116905	0.000265322
4	12	CRYAA	-0.011483	0.000241448
4	13	CRYAA	-0.0113191	0.000173968
4	14	CRYAA	-0.0112295	3.2108e-05
4	15	CRYAA	-0.0110484	-1.81071e-05
4	16	CRYAA	-0.0107369	6.19419e-05
4	17	CRYAA	-0.0105774	-9.88459e-06
4	18	CRYAA	-0.0107881	-0.000452044
4	19	CRYAA	-0.0108514	-0.000746701
4	20	CRYAA	-0.0104077	-0.000534419
4	21	CRYAA	-0.0101148	-0.000472897
4	22	CRYAA	-0.00981085	-0.00040036
4	23	CRYAA	-0.00975367	-0.00057458
4	24	CRYAA	-0.00963169	-0.000683992
4	25	CRYAA	-0.00966631	-0.000950005
4	26	CRYAA	-0.00950028	-0.00101537
4	27	CRYAA	-0.00926539	-0.00101188
4	28	CRYAA	-0.00897033	-0.000948218
4	29	CRYAA	-0.00889635	-0.00110563
4	30	CRYAA	-0.00829152	-0.000732199
4	31	CRYAA	-0.00720936	0.000118574
4	32	CRYAA	-0.00561421	0.00148232
4	33	CRYAA	-0.00200791	0.00485723
4	34	CRYAA	0.00465237	0.0112861
4	35	CRYAA	0.0174257	0.023828
4	36	CRYAA	0.0414987	0.0476696
4	37	CRYAA	0.0879842	0.0939237
4	38	CRYAA	0.172399	0.178107
4	39	CRYAA	0.30559	0.311066
4	40	CRYAA	0.447846	0.453091
5	1	CRYAA	-0.0168719	0.000850743
5	2	CRYAA	-0.016784	0.000768359
5	3	CRYAA	-0.0164113	0.000970659
5	4	CRYAA	-0.016099	0.00111259
5	5	CRYAA	-0.0160846	0.000956716
5	6	CRYAA	-0.0166129	0.000258091
5	7	CRYAA	-0.0167414	-4.08352e-05
5	8	CRYAA	-0.0166199	-8.96658e-05
5	9	CRYAA	-0.0165371	-0.000177197
5	10	CRYAA	-0.0162097	-2.01639e-05
5	11	CRYAA	-0.0161048	-8.55441e-05
5	12	CRYAA	-0.0159135	-6.45982e-05
5	13	CRYAA	-0.0158472	-0.000168643
5	14	CRYAA	-0.0155406	-3.23464e-05
5	15	CRYAA	-0.0153551	-1.72669e-05
5	16	CRYAA	-0.015565	-0.000397482
5	17	CRYAA	-0.0156278	-0.000630581
5	18	CRYAA	-0.0154073	-0.000580457
5	19	CRYAA	-0.0153331	-0.000676603
5	20	CRYAA	-0.0152158	-0.000729681
5	21	CRYAA	-0.0150568	-0.000740983
5	22	CRYAA	-0.0144619	-0.000316478
5	23	CRYAA	-0.0147075	-0.000732329
5	24	CRYAA	-0.014845	-0.00104017
5	25	CRYAA	-0.0146476	-0.00101316
5	26	CRYAA	-0.0143698	-0.00090573
5	27	CRYAA	-0.0140009	-0.000707122
5	28	CRYAA	-0.0135488	-0.000425406
5	29	CRYAA	-0.0127224	0.00023065
5	30	CRYAA	-0.0110329	0.00174982
5	31	CRYAA	-0.00829847	0.00431392
5	32	CRYAA	-0.00238323	0.0100588
5	33	CRYAA	0.00918218	0.0214539
5	34	CRYAA	0.0310942	0.0431955
5	35	CRYAA	0.0727027	0.0846337
5	36	CRYAA	0.148317	0.160077
5	37	CRYAA	0.270274	0.281864
5	38	CRYAA	0.428011	0.439431
5	39	CRYAA	0.58759	0.59884
5	40	CRYAA	0.70346	0.714539
6	1	CRYAA	0.0131698	-0.00220324
6	2	CRYAA	0.0139721	-0.00189511
6	3	CRYAA	0.0155087	-0.000852719
6	4	CRYAA	0.016615	-0.000240684
6	5	CRYAA	0.0172713	-7.86372e-05
6	6	CRYAA	0.0182732	0.0004291
6	7	CRYAA	0.0192131	0.00087476
6	8	CRYAA	0.0193714	0.000538821
6	9	CRYAA	0.0195689	0.000242189
6	10	CRYAA	0.019997	0.000175995
6	11	CRYAA	0.0207701	0.000454961
6	12	CRYAA	0.0212121	0.000402692
6	13	CRYAA	0.0217389	0.000435257
6	14	CRYAA	0.0222335	0.000435644
6	15	CRYAA	0.0224854	0.000193318
6	16	CRYAA	0.0226881	-9.8158e-05
6	17	CRYAA	0.0230716	-0.000208892
6	18	CRYAA	0.0234784	-0.000296252
6	19	CRYAA	0.0235902	-0.000678711
6	20	CRYAA	0.0239577	-0.00080538
6	21	CRYAA	0.024592	-0.000665314
6	22	CRYAA	0.024881	-0.000870531
6	23	CRYAA	0.0252104	-0.00103539
6	24	CRYAA	0.0258054	-0.00093463
6	25	CRYAA	0.026325	-0.000909186
6	26	CRYAA	0.0268521	-0.000876345
6	27	CRYAA	0.0278427	-0.000379971
6	28	CRYAA	0.0293392	0.000622393
6	29	CRYAA	0.0333367	0.00412567
6	30	CRYAA	0.0389698	0.00926453
6	31	CRYAA	0.0502419	0.0200424
6	32	CRYAA	0.0722198	0.041526
6	33	CRYAA	0.113019	0.0818314
6	34	CRYAA	0.180417	0.148735
6	35	CRYAA	0.277714	0.245538
6	36	CRYAA	0.397411	0.364741
6	37	CRYAA	0.541609	0.508445
6	38	CRYAA	0.680728	0.647069
6	39	CRYAA	0.78748	0.753327
6	40	CRYAA	0.851244	0.816597
7	1	CRYAA	-0.00800589	-0.00348044
7	2	CRYAA	-0.00700857	-0.00285501
7	3	CRYAA	-0.00515568	-0.00137401
7	4	CRYAA	-0.00412968	-0.000719903
7	5	CRYAA	-0.00291727	0.000120612
7	6	CRYAA	-0.00235528	0.000310711
7	7	CRYAA	-0.00178977	0.000504327
7	8	CRYAA	-0.00132608	0.00059613
7	9	CRYAA	-0.000895721	0.000654598
7	10	CRYAA	-0.000696279	0.00048215
7	11	CRYAA	-0.000253547	0.00055299
7	12	CRYAA	8.40887e-05	0.000518735
7	13	CRYAA	0.000204841	0.000267596
7	14	CRYAA	0.000692706	0.00038357
7	15	CRYAA	0.00101301	0.000331981
7	16	CRYAA	0.00110958	5.66596e-05
7	17	CRYAA	0.00107904	-0.000345769
7	18	CRYAA	0.00160294	-0.000193765
7	19	CRYAA	0.00206265	-0.000105944
7	20	CRYAA	0.00208813	-0.000452354
7	21	CRYAA	0.00235838	-0.000553998
7	22	CRYAA	0.00297574	-0.000308526
7	23	CRYAA	0.00314499	-0.000511166
7	24	CRYAA	0.00342277	-0.000605276
7	25	CRYAA	0.00353805	-0.000861893
7	26	CRYAA	0.00361222	-0.00115961
7	27	CRYAA	0.00422809	-0.000915629
7	28	CRYAA	0.00505571	-0.000459904
7	29	CRYAA	0.00661143	0.000723922
7	30	CRYAA	0.00932316	0.00306377
7	31	CRYAA	0.0143149	0.00768365
7	32	CRYAA	0.0239969	0.0169937
7	33	CRYAA	0.0426149	0.0352398
7	34	CRYAA	0.0778964	0.0701494
7	35	CRYAA	0.141779	0.13366
7	36	CRYAA	0.248575	0.240085
7	37	CRYAA	0.40531	0.396447
7	38	CRYAA	0.590303	0.581068
7	39	CRYAA	0.735989	0.726383
7	40	CRYAA	0.797604	0.787626
8	1	CRYAA	-0.0234373	-0.00199449
8	2	CRYAA	-0.0228062	-0.00160427
8	3	CRYAA	-0.0220746	-0.00111368
8	4	CRYAA	-0.0214353	-0.000715273
8	5	CRYAA	-0.0208358	-0.000356659
8	6	CRYAA	-0.0200635	0.000174642
8	7	CRYAA	-0.0193974	0.000599834
8	8	CRYAA	-0.0189618	0.000794496
8	9	CRYAA	-0.0185854	0.000929993
8	10	CRYAA	-0.0185232	0.000751245
8	11	CRYAA	-0.0184646	0.000568887
8	12	CRYAA	-0.0184102	0.000382325
8	13	CRYAA	-0.0183712	0.000180405
8	14	CRYAA	-0.0182279	8.28351e-05
8	15	CRYAA	-0.0180392	3.0581e-05
8	16	CRYAA	-0.0179315	-0.000102668
8	17	CRYAA	-0.0178448	-0.000256941
8	18	CRYAA	-0.017623	-0.000275986
8	19	CRYAA	-0.0174941	-0.000388095
8	20	CRYAA	-0.0172228	-0.000357673
8	21	CRYAA	-0.0170815	-0.000457322
8	22	CRYAA	-0.017082	-0.000698758
8	23	CRYAA	-0.0169821	-0.000839778
8	24	CRYAA	-0.0169065	-0.00100509
8	25	CRYAA	-0.0162001	-0.000539695
8	26	CRYAA	-0.0157048	-0.000285332
8	27	CRYAA	-0.0145641	0.000614501
8	28	CRYAA	-0.0126544	0.0022832
8	29	CRYAA	-0.00888069	0.00581602
8	30	CRYAA	-0.00178833	0.0126675
8	31	CRYAA	0.0125133	0.0267281
8	32	CRYAA	0.0396226	0.0535965
8	33	CRYAA	0.0898035	0.103536
8	34	CRYAA	0.174544	0.188036
8	35	CRYAA	0.292521	0.305772
8	36	CRYAA	0.44112	0.45413
8	37	CRYAA	0.590266	0.603035
8	38	CRYAA	0.708113	0.720642
8	39	CRYAA	0.788515	0.800802
8	40	CRYAA	0.837725	0.849771
9	1	CRYAA	-0.0142241	-0.00197181
9	2	CRYAA	-0.0137538	-0.00166335
9	3	CRYAA	-0.0123792	-0.000450631
9	4	CRYAA	-0.0117045	6.22496e-05
9	5	CRYAA	-0.0110817	0.00052323
9	6	CRYAA	-0.0108217	0.000621308
9	7	CRYAA	-0.0105915	0.000689656
9	8	CRYAA	-0.0103473	0.000772058
9	9	CRYAA	-0.0104391	0.0005184
9	10	CRYAA	-0.0105818	0.000213863
9	11	CRYAA	-0.0105472	8.65652e-05
9	12	CRYAA	-0.01023	0.000241917
9	13	CRYAA	-0.0104306	-0.000120542
9	14	CRYAA	-0.0104943	-0.000346068
9	15	CRYAA	-0.0100998	-0.000113438
9	16	CRYAA	-0.0101157	-0.000291143
9	17	CRYAA	-0.0101354	-0.000472701
9	18	CRYAA	-0.00989701	-0.000396169
9	19	CRYAA	-0.00983716	-0.000498173
9	20	CRYAA	-0.00953512	-0.000357978
9	21	CRYAA	-0.00940942	-0.00039413
9	22	CRYAA	-0.00940003	-0.000546594
9	23	CRYAA	-0.00924834	-0.000556752
9	24	CRYAA	-0.00913119	-0.000601455
9	25	CRYAA	-0.00911856	-0.000750674
9	26	CRYAA	-0.00897555	-0.000769508
9	27	CRYAA	-0.00900274	-0.000958545
9	28	CRYAA	-0.00892057	-0.00103823
9	29	CRYAA	-0.0085349	-0.000814405
9	30	CRYAA	-0.00755414	4.49999e-06
9	31	CRYAA	-0.00601735	0.00137944
9	32	CRYAA	-0.00287099	0.00436396
9	33	CRYAA	0.00312437	0.0101975
9	34	CRYAA	0.0141958	0.021107
9	35	CRYAA	0.03464	0.0413894
9	36	CRYAA	0.0741594	0.0807469
9	37	CRYAA	0.146625	0.153051
9	38	CRYAA	0.261114	0.267377
9	39	CRYAA	0.405907	0.412009
9	40	CRYAA	0.530461	0.536401
10	1	CRYAA	-0.00850841	-0.00190628
10	2	CRYAA	-0.00791679	-0.00155822
10	3	CRYAA	-0.00695062	-0.000835605
10	4	CRYAA	-0.00634903	-0.000477562
10	5	CRYAA	-0.00560397	2.39474e-05
10	6	CRYAA	-0.00519014	0.000194228
10	7	CRYAA	-0.0045761	0.000564718
10	8	CRYAA	-0.00434252	0.000554744
10	9	CRYAA	-0.00422729	0.000426416
10	10	CRYAA	-0.00409323	0.00031693
10	11	CRYAA	-0.00364449	0.000522121
10	12	CRYAA	-0.00340786	0.000515197
10	13	CRYAA	-0.00330985	0.000369657
10	14	CRYAA	-0.00329384	0.000142109
10	15	CRYAA	-0.00287848	0.000313924
10	16	CRYAA	-0.00279345	0.000155399
10	17	CRYAA	-0.00243613	0.000269169
10	18	CRYAA	-0.00230967	0.000152081
10	19	CRYAA	-0.00212333	9.48661e-05
10	20	CRYAA	-0.00205801	-8.33704e-05
10	21	CRYAA	-0.0022077	-0.000476606
10	22	CRYAA	-0.00227541	-0.000787869
10	23	CRYAA	-0.00193385	-0.000689862
10	24	CRYAA	-0.0019014	-0.000900966
10	25	CRYAA	-0.00166255	-0.000905665
10	26	CRYAA	-0.00161311	-0.00109977
10	27	CRYAA	-0.00137933	-0.00110955
10	28	CRYAA	-0.00113426	-0.00110803
10	29	CRYAA	-0.000789004	-0.00100632
10	30	CRYAA	-3.94532e-05	-0.000500326
10	31	CRYAA	0.000777216	7.27921e-05
10	32	CRYAA	0.0022675	0.00131952
10	33	CRYAA	0.00516522	0.00397369
10	34	CRYAA	0.010516	0.00908089
10	35	CRYAA	0.0208332	0.0191546
10	36	CRYAA	0.0391312	0.037209
10	37	CRYAA	0.0746583	0.0724926
10	38	CRYAA	0.139302	0.136893
10	39	CRYAA	0.244867	0.242214
10	40	CRYAA	0.362631	0.359735
11	1	CRYAA	-0.027596	3.96577e-05
11	2	CRYAA	-0.0274525	7.54042e-05
11	3	CRYAA	-0.0276268	-0.000206719
11	4	CRYAA	-0.0275773	-0.000264952
11	5	CRYAA	-0.0270169	0.000187669
11	6	CRYAA	-0.0268703	0.000226474
11	7	CRYAA	-0.0268888	0.00010015
11	8	CRYAA	-0.0267669	0.000114264
11	9	CRYAA	-0.0266164	0.000156989
11	10	CRYAA	-0.0262011	0.000464431
11	11	CRYAA	-0.0260957	0.000462052
11	12	CRYAA	-0.0258487	0.000601293
11	13	CRYAA	-0.025852	0.000490226
11	14	CRYAA	-0.0258587	0.000375657
11	15	CRYAA	-0.0259527	0.000173894
11	16	CRYAA	-0.0259778	4.10056e-05
11	17	CRYAA	-0.0257093	0.000201751
11	18	CRYAA	-0.0255922	0.000211001
11	19	CRYAA	-0.025748	-5.26002e-05
11	20	CRYAA	-0.0258958	-0.000308198
11	21	CRYAA	-0.026001	-0.000521118
11	22	CRYAA	-0.0260812	-0.000709189
11	23	CRYAA	-0.0261908	-0.000926583
11	24	CRYAA	-0.0262705	-0.00111408
11	25	CRYAA	-0.0260999	-0.00105123
11	26	CRYAA	-0.0256825	-0.000741657
11	27	CRYAA	-0.0258845	-0.00105142
11	28	CRYAA	-0.025937	-0.00121171
11	29	CRYAA	-0.0255005	-0.000883024
11	30	CRYAA	-0.0250583	-0.000548627
11	31	CRYAA	-0.024256	0.000145935
11	32	CRYAA	-0.0226985	0.00159565
11	33	CRYAA	-0.0201437	0.00404267
11	34	CRYAA	-0.0151717	0.00890683
11	35	CRYAA	-0.00595454	0.0180162
11	36	CRYAA	0.0117691	0.0356321
11	37	CRYAA	0.0454153	0.0691705
11	38	CRYAA	0.107209	0.130856
11	39	CRYAA	0.209953	0.233492
11	40	CRYAA	0.327812	0.351243
12	1	CRYAA	-0.0279841	0.000190763
12	2	CRYAA	-0.0276953	0.000303032
12	3	CRYAA	-0.027022	0.000799793
12	4	CRYAA	-0.0268914	0.000753862
12	5	CRYAA	-0.0271042	0.00036462
12	6	CRYAA	-0.0271782	0.000114082
12	7	CRYAA	-0.0270386	7.71718e-05
12	8	CRYAA	-0.0269657	-2.64207e-05
12	9	CRYAA	-0.0264732	0.000289605
12	10	CRYAA	-0.0261392	0.000447059
12	11	CRYAA	-0.0260698	0.000340008
12	12	CRYAA	-0.0257877	0.000445542
12	13	CRYAA	-0.0257544	0.000302327
12	14	CRYAA	-0.0258298	5.04214e-05
12	15	CRYAA	-0.0257878	-8.40351e-05
12	16	CRYAA	-0.0260183	-0.000491077
12	17	CRYAA	-0.0267052	-0.00135453
12	18	CRYAA	-0.0266725	-0.0014983
12	19	CRYAA	-0.0255967	-0.000599051
12	20	CRYAA	-0.0253142	-0.000493014
12	21	CRYAA	-0.0252519	-0.000607209
12	22	CRYAA	-0.0251592	-0.000691016
12	23	CRYAA	-0.0252215	-0.000929853
12	24	CRYAA	-0.025222	-0.00110687
12	25	CRYAA	-0.0251804	-0.00124176
12	26	CRYAA	-0.0246713	-0.000909142
12	27	CRYAA	-0.0244148	-0.000829161
12	28	CRYAA	-0.0232734	0.000135749
12	29	CRYAA	-0.0214754	0.00175721
12	30	CRYAA	-0.0180721	0.00498398
12	31	CRYAA	-0.0122431	0.0106365
12	32	CRYAA	-0.000916261	0.0217868
12	33	CRYAA	0.0211782	0.0437048
12	34	CRYAA	0.0610976	0.0834477
12	35	CRYAA	0.129601	0.151775
12	36	CRYAA	0.218371	0.240368
12	37	CRYAA	0.317857	0.339678
12	38	CRYAA	0.435919	0.457563
12	39	CRYAA	0.547306	0.568774
12	40	CRYAA	0.624008	0.645299
13	1	CRYAA	0.0296316	-0.00651304
13	2	CRYAA	0.0319807	-0.00503453
13	3	CRYAA	0.0352205	-0.00266534
13	4	CRYAA	0.0374971	-0.00125936
13	5	CRYAA	0.0390991	-0.000527911
13	6	CRYAA	0.0405411	4.34678e-05
13	7	CRYAA	0.0415469	0.000178589
13	8	CRYAA	0.0429565	0.000717587
13	9	CRYAA	0.0442437	0.00113422
13	10	CRYAA	0.0452326	0.00125253
13	11	CRYAA	0.0458272	0.000976532
13	12	CRYAA	0.0465117	0.000790391
13	13	CRYAA	0.0473821	0.000790225
13	14	CRYAA	0.048163	0.000700446
13	15	CRYAA	0.0491995	0.00086642
13	16	CRYAA	0.0494731	0.00026941
13	17	CRYAA	0.0501445	7.01415e-05
13	18	CRYAA	0.0513044	0.000359415
13	19	CRYAA	0.0520123	0.000196763
13	20	CRYAA	0.0527224	3.6211e-05
13	21	CRYAA	0.0529124	-0.000644354
13	22	CRYAA	0.0538672	-0.000560131
13	23	CRYAA	0.0546939	-0.000604111
13	24	CRYAA	0.05491	-0.00125863
13	25	CRYAA	0.056188	-0.000851196
13	26	CRYAA	0.0571451	-0.000764716
13	27	CRYAA	0.0577985	-0.00098187
13	28	CRYAA	0.0587986	-0.000852441
13	29	CRYAA	0.0607046	0.000182945
13	30	CRYAA	0.063797	0.00240476
13	31	CRYAA	0.0693533	0.00709046
13	32	CRYAA	0.0794631	0.0163297
13	33	CRYAA	0.097788	0.033784
13	34	CRYAA	0.132304	0.0674295
13	35	CRYAA	0.194446	0.128701
13	36	CRYAA	0.296404	0.229789
13	37	CRYAA	0.442049	0.374562
13	38	CRYAA	0.586676	0.518319
13	39	CRYAA	0.67353	0.604302
13	40	CRYAA	0.745527	0.675429
14	1	CRYAA	-0.0179537	-0.000198049
14	2	CRYAA	-0.0178947	-0.000348248
14	3	CRYAA	-0.0173404	-3.23348e-06
14	4	CRYAA	-0.0167638	0.000364113
14	5	CRYAA	-0.0161395	0.000779222
14	6	CRYAA	-0.0158772	0.000832268
14	7	CRYAA	-0.0158788	0.000621447
14	8	CRYAA	-0.0159159	0.000375141
14	9	CRYAA	-0.0159231	0.000158745
14	10	CRYAA	-0.0156658	0.000206835
14	11	CRYAA	-0.0156495	1.38958e-05
14	12	CRYAA	-0.0156022	-0.000148077
14	13	CRYAA	-0.0156331	-0.000388181
14	14	CRYAA	-0.015452	-0.000416363
14	15	CRYAA	-0.0151399	-0.000313501
14	16	CRYAA	-0.0150705	-0.000453236
14	17	CRYAA	-0.0147438	-0.000335794
14	18	CRYAA	-0.0143257	-0.000126962
14	19	CRYAA	-0.0140947	-0.000105162
14	20	CRYAA	-0.0140811	-0.000300755
14	21	CRYAA	-0.0141817	-0.000610647
14	22	CRYAA	-0.0142686	-0.000906797
14	23	CRYAA	-0.0141727	-0.00102013
14	24	CRYAA	-0.0141066	-0.00116318
14	25	CRYAA	-0.0136122	-0.000878039
14	26	CRYAA	-0.0134891	-0.000964139
14	27	CRYAA	-0.0130499	-0.000734239
14	28	CRYAA	-0.012487	-0.000380548
14	29	CRYAA	-0.0116509	0.000246335
14	30	CRYAA	-0.0102907	0.00139734
14	31	CRYAA	-0.00722515	0.00425364
14	32	CRYAA	-0.00193765	0.00933192
14	33	CRYAA	0.00865649	0.0197168
14	34	CRYAA	0.0292664	0.0401175
14	35	CRYAA	0.0680479	0.0786898
14	36	CRYAA	0.139631	0.150064
14	37	CRYAA	0.25874	0.268963
14	38	CRYAA	0.420267	0.430281
14	39	CRYAA	0.589122	0.598927
14	40	CRYAA	0.714839	0.724435
15	1	CRYAA	-0.0245035	-0.000292518
15	2	CRYAA	-0.0243745	-0.000339205
15	3	CRYAA	-0.0238029	5.66198e-05
15	4	CRYAA	-0.0232752	0.000408684
15	5	CRYAA	-0.0232762	0.000231995
15	6	CRYAA	-0.023271	6.14898e-05
15	7	CRYAA	-0.0229527	0.000204146
15	8	CRYAA	-0.0228195	0.000161644
15	9	CRYAA	-0.0223924	0.000412974
15	10	CRYAA	-0.0223473	0.000282426
15	11	CRYAA	-0.0223618	9.22034e-05
15	12	CRYAA	-0.0222422	3.61785e-05
15	13	CRYAA	-0.0219802	0.000122489
15	14	CRYAA	-0.0219815	-5.45869e-05
15	15	CRYAA	-0.0219495	-0.000198221
15	16	CRYAA	-0.0215956	-2.00801e-05
15	17	CRYAA	-0.0216026	-0.000202681
15	18	CRYAA	-0.0216432	-0.000419065
15	19	CRYAA	-0.0215476	-0.000499142
15	20	CRYAA	-0.0214953	-0.000622513
15	21	CRYAA	-0.0210434	-0.000346314
15	22	CRYAA	-0.0208853	-0.000363935
15	23	CRYAA	-0.020924	-0.000578311
15	24	CRYAA	-0.0210358	-0.000865742
15	25	CRYAA	-0.0209934	-0.000999087
15	26	CRYAA	-0.0205083	-0.000689674
15	27	CRYAA	-0.0201147	-0.000471773
15	28	CRYAA	-0.0191914	0.00027582
15	29	CRYAA	-0.0183837	0.000907894
15	30	CRYAA	-0.0160393	0.00307656
15	31	CRYAA	-0.0115131	0.00742703
15	32	CRYAA	-0.0026759	0.0160886
15	33	CRYAA	0.0139478	0.0325366
15	34	CRYAA	0.0456208	0.0640339
15	35	CRYAA	0.104775	0.123012
15	36	CRYAA	0.206434	0.224496
15	37	CRYAA	0.359907	0.377793
15	38	CRYAA	0.545305	0.563015
15	39	CRYAA	0.691167	0.708701
15	40	CRYAA	0.755173	0.772532
16	1	CRYAA	-0.00796199	-0.00307532
16	2	CRYAA	-0.00708076	-0.00246601
16	3	CRYAA	-0.00585588	-0.00151306
16	4	CRYAA	-0.00495543	-0.000884528
16	5	CRYAA	-0.00415622	-0.000357241
16	6	CRYAA	-0.00353953	-1.24825e-05
16	7	CRYAA	-0.00276345	0.000491673
16	8	CRYAA	-0.00208336	0.000899839
16	9	CRYAA	-0.00206515	0.000646125
16	10	CRYAA	-0.00196264	0.000476705
16	11	CRYAA	-0.00157325	0.000594175
16	12	CRYAA	-0.00123173	0.00066377
16	13	CRYAA	-0.000989581	0.000633991
16	14	CRYAA	-0.000621644	0.000730003
16	15	CRYAA	-0.000380913	0.000698808
16	16	CRYAA	-0.000219531	0.000588266
16	17	CRYAA	4.38284e-05	0.000579699
16	18	CRYAA	-0.000288624	-2.46787e-05
16	19	CRYAA	-0.000401497	-0.000409477
16	20	CRYAA	0.000109427	-0.000170478
16	21	CRYAA	0.000210221	-0.00034161
16	22	CRYAA	0.000113939	-0.000709817
16	23	CRYAA	0.000321507	-0.000774175
16	24	CRYAA	0.000414065	-0.000953541
16	25	CRYAA	0.000624401	-0.00101513
16	26	CRYAA	0.000889062	-0.0010224
16	27	CRYAA	0.00137687	-0.000806517
16	28	CRYAA	0.00173563	-0.000719676
16	29	CRYAA	0.00168309	-0.00104414
16	30	CRYAA	0.0021199	-0.000879263
16	31	CRYAA	0.00344811	0.000177025
16	32	CRYAA	0.0044856	0.000942588
16	33	CRYAA	0.00733047	0.00351554
16	34	CRYAA	0.0125193	0.00843241
16	35	CRYAA	0.0216573	0.0172985
16	36	CRYAA	0.0396452	0.0350144
16	37	CRYAA	0.0735464	0.0686437
16	38	CRYAA	0.136223	0.131049
16	39	CRYAA	0.240963	0.235516
16	40	CRYAA	0.360445	0.354727
17	1	CRYAA	-0.0127011	-0.000562477
17	2	CRYAA	-0.0121075	-0.00023459
17	3	CRYAA	-0.0116439	-3.67444e-05
17	4	CRYAA	-0.0115983	-0.000256941
17	5	CRYAA	-0.0111874	-0.000111734
17	6	CRYAA	-0.0104598	0.000350135
17	7	CRYAA	-0.0100044	0.000539823
17	8	CRYAA	-0.00969306	0.000585384
17	9	CRYAA	-0.00973269	0.000280018
17	10	CRYAA	-0.00966244	8.45284e-05
17	11	CRYAA	-0.00925534	0.000225891
17	12	CRYAA	-0.00942827	-0.000212778
17	13	CRYAA	-0.00952202	-0.000572262
17	14	CRYAA	-0.00917686	-0.00049284
17	15	CRYAA	-0.00885792	-0.000439639
17	16	CRYAA	-0.00879734	-0.000644792
17	17	CRYAA	-0.00860144	-0.000714628
17	18	CRYAA	-0.00750177	0.000119302
17	19	CRYAA	-0.0052539	0.00210143
17	20	CRYAA	-0.00557511	0.00151448
17	21	CRYAA	-0.00650622	0.000317633
17	22	CRYAA	-0.00746545	-0.000907333
17	23	CRYAA	-0.00764026	-0.00134787
17	24	CRYAA	-0.00706051	-0.00103386
17	25	CRYAA	-0.00692357	-0.00116267
17	26	CRYAA	-0.00674531	-0.00125014
17	27	CRYAA	-0.00578292	-0.000553489
17	28	CRYAA	-0.00450121	0.000462484
17	29	CRYAA	-0.00154135	0.00315661
17	30	CRYAA	0.00276757	0.00719979
17	31	CRYAA	0.0117567	0.0159232
17	32	CRYAA	0.0295843	0.0334851
17	33	CRYAA	0.0626865	0.0663215
17	34	CRYAA	0.124566	0.127935
17	35	CRYAA	0.231373	0.234476
17	36	CRYAA	0.38296	0.385798
17	37	CRYAA	0.547591	0.550163
17	38	CRYAA	0.686426	0.688732
17	39	CRYAA	0.781583	0.783624
17	40	CRYAA	0.836706	0.838481
18	1	CRYAA	0.0516589	-0.00356853
18	2	CRYAA	0.0518383	-0.00390483
18	3	CRYAA	0.0540913	-0.00216767
18	4	CRYAA	0.0560701	-0.000704588
18	5	CRYAA	0.0573445	5.40501e-05
18	6	CRYAA	0.0583737	0.000567538
18	7	CRYAA	0.0593037	0.000981731
18	8	CRYAA	0.0594734	0.000635679
18	9	CRYAA	0.0599964	0.000643
18	10	CRYAA	0.060634	0.000764803
18	11	CRYAA	0.0614464	0.00106152
18	12	CRYAA	0.0615847	0.000683974
18	13	CRYAA	0.0620795	0.000663027
18	14	CRYAA	0.0625542	0.000622065
18	15	CRYAA	0.0629241	0.000476206
18	16	CRYAA	0.0631455	0.000181797
18	17	CRYAA	0.0634371	-4.23226e-05
18	18	CRYAA	0.063522	-0.000473159
18	19	CRYAA	0.063553	-0.000957945
18	20	CRYAA	0.0644823	-0.000544385
18	21	CRYAA	0.0654431	-9.93827e-05
18	22	CRYAA	0.0658088	-0.000249392
18	23	CRYAA	0.0658125	-0.000761469
18	24	CRYAA	0.0660734	-0.00101632
18	25	CRYAA	0.0663297	-0.00127579
18	26	CRYAA	0.0666623	-0.0014589
18	27	CRYAA	0.0674356	-0.00120132
18	28	CRYAA	0.0678659	-0.0012868
18	29	CRYAA	0.0686293	-0.00103917
18	30	CRYAA	0.0699438	-0.000240369
18	31	CRYAA	0.0721429	0.00144294
18	32	CRYAA	0.0759563	0.00474064
18	33	CRYAA	0.0827366	0.0110052
18	34	CRYAA	0.0969591	0.0247119
18	35	CRYAA	0.123399	0.0506364
18	36	CRYAA	0.171738	0.0984593
18	37	CRYAA	0.257495	0.183701
18	38	CRYAA	0.385432	0.311122
18	39	CRYAA	0.524255	0.449429
18	40	CRYAA	0.628644	0.553302
19	1	CRYAA	0.0272054	0.00933348
19	2	CRYAA	0.0267028	0.0104696
19	3	CRYAA	0.0242411	0.00964648
19	4	CRYAA	0.0221709	0.00921502
19	5	CRYAA	0.0194318	0.00811461
19	6	CRYAA	0.0161353	0.00645682
19	7	CRYAA	0.0111891	0.00314928
19	8	CRYAA	0.00579785	-0.000603217
19	9	CRYAA	0.00257724	-0.00218514
19	10	CRYAA	-1.46143e-05	-0.00313829
19	11	CRYAA	-0.00272154	-0.00420652
19	12	CRYAA	-0.0047674	-0.00461367
19	13	CRYAA	-0.00626305	-0.00447062
19	14	CRYAA	-0.00891486	-0.00548374
19	15	CRYAA	-0.0114401	-0.00637027
19	16	CRYAA	-0.0137276	-0.00701903
19	17	CRYAA	-0.0150716	-0.0067244
19	18	CRYAA	-0.016421	-0.00643506
19	19	CRYAA	-0.018231	-0.00660636
19	20	CRYAA	-0.0189366	-0.00567323
19	21	CRYAA	-0.0195806	-0.00467854
19	22	CRYAA	-0.0190868	-0.00254604
19	23	CRYAA	-0.0161623	0.00201711
19	24	CRYAA	-0.0167349	0.00308324
19	25	CRYAA	-0.0176489	0.00380787
19	26	CRYAA	-0.0186867	0.00440885
19	27	CRYAA	-0.0199997	0.00473453
19	28	CRYAA	-0.0220205	0.00435242
19	29	CRYAA	-0.0274998	0.000511802
19	30	CRYAA	-0.0288962	0.000754089
19	31	CRYAA	-0.0291116	0.00217744
19	32	CRYAA	-0.0298285	0.00309921
19	33	CRYAA	-0.0293411	0.00522533
19	34	CRYAA	-0.025412	0.0107931
19	35	CRYAA	-0.0177086	0.0201352
19	36	CRYAA	-0.00180858	0.0376739
19	37	CRYAA	0.03117	0.0722912
19	38	CRYAA	0.0958238	0.138584
19	39	CRYAA	0.205707	0.250105
19	40	CRYAA	0.333582	0.37962
20	1	CRYAA	-0.061413	0.0162852
20	2	CRYAA	-0.0631317	0.0153775
20	3	CRYAA	-0.0682738	0.0110465
20	4	CRYAA	-0.0732031	0.00692838
20	5	CRYAA	-0.0764305	0.00451216
20	6	CRYAA	-0.0786668	0.00308701
20	7	CRYAA	-0.0796063	0.00295865
20	8	CRYAA	-0.0815525	0.00182353
20	9	CRYAA	-0.0847142	-0.000527058
20	10	CRYAA	-0.0860331	-0.0010348
20	11	CRYAA	-0.0878254	-0.00201593
20	12	CRYAA	-0.0892722	-0.00265163
20	13	CRYAA	-0.0903824	-0.00295073
20	14	CRYAA	-0.0917899	-0.00354705
20	15	CRYAA	-0.0931514	-0.00409738
20	16	CRYAA	-0.0939135	-0.00404842
20	17	CRYAA	-0.0944329	-0.00375661
20	18	CRYAA	-0.0948119	-0.00332452
20	19	CRYAA	-0.0955251	-0.00322654
20	20	CRYAA	-0.0963699	-0.00326023
20	21	CRYAA	-0.0965841	-0.00266334
20	22	CRYAA	-0.0966141	-0.0018822
20	23	CRYAA	-0.0981211	-0.00257809
20	24	CRYAA	-0.0987641	-0.00240993
20	25	CRYAA	-0.09952	-0.00235472
20	26	CRYAA	-0.100758	-0.00278121
20	27	CRYAA	-0.101109	-0.00232144
20	28	CRYAA	-0.101136	-0.0015368
20	29	CRYAA	-0.101234	-0.00082369
20	30	CRYAA	-0.101381	-0.000159556
20	31	CRYAA	-0.101876	0.000156486
20	32	CRYAA	-0.102872	-2.88733e-05
20	33	CRYAA	-0.103062	0.000592717
20	34	CRYAA	-0.102868	0.00159741
20	35	CRYAA	-0.102881	0.00239577
20	36	CRYAA	-0.103095	0.00299266
20	37	CRYAA	-0.103088	0.00381134
20	38	CRYAA	-0.102611	0.00509861
20	39	CRYAA	-0.101542	0.0069795
20	40	CRYAA	-0.100162	0.00916987
21	1	CRYAA	0.0605425	-0.00590108
21	2	CRYAA	0.0617069	-0.00544663
21	3	CRYAA	0.0637675	-0.00409609
21	4	CRYAA	0.065663	-0.00291059
21	5	CRYAA	0.0673641	-0.00191938
21	6	CRYAA	0.069417	-0.000576535
21	7	CRYAA	0.0710751	0.000371559
21	8	CRYAA	0.0719518	0.000538318
21	9	CRYAA	0.0734009	0.00127745
21	10	CRYAA	0.0742154	0.00138193
21	11	CRYAA	0.074874	0.00133058
21	12	CRYAA	0.0759443	0.00169088
21	13	CRYAA	0.076663	0.00169957
21	14	CRYAA	0.0777526	0.00207914
21	15	CRYAA	0.0781589	0.00177552
21	16	CRYAA	0.0784345	0.00134106
21	17	CRYAA	0.0789106	0.0011072
21	18	CRYAA	0.0792812	0.000767815
21	19	CRYAA	0.0799758	0.000752407
21	20	CRYAA	0.0803878	0.000454444
21	21	CRYAA	0.0809891	0.000345748
21	22	CRYAA	0.0811955	-0.000157844
21	23	CRYAA	0.0813202	-0.000743132
21	24	CRYAA	0.0819378	-0.000835526
21	25	CRYAA	0.0825069	-0.000976364
21	26	CRYAA	0.0829307	-0.00126256
21	27	CRYAA	0.0836152	-0.0012881
21	28	CRYAA	0.0841334	-0.00147984
21	29	CRYAA	0.0849708	-0.00135247
21	30	CRYAA	0.087718	0.000684797
21	31	CRYAA	0.0918577	0.00411449
21	32	CRYAA	0.0994038	0.0109506
21	33	CRYAA	0.113917	0.0247539
21	34	CRYAA	0.141219	0.0513459
21	35	CRYAA	0.190467	0.099884
21	36	CRYAA	0.273067	0.181774
21	37	CRYAA	0.393931	0.301928
21	38	CRYAA	0.539166	0.446452
21	39	CRYAA	0.663918	0.570495
21	40	CRYAA	0.722217	0.628084
22	1	CRYAA	0.0284367	-0.00639886
22	2	CRYAA	0.0301537	-0.00533402
22	3	CRYAA	0.0323535	-0.00378646
22	4	CRYAA	0.0344307	-0.00236153
22	5	CRYAA	0.0358025	-0.00164196
22	6	CRYAA	0.0370702	-0.00102651
22	7	CRYAA	0.0381007	-0.000648179
22	8	CRYAA	0.0391004	-0.000300779
22	9	CRYAA	0.0402099	0.000156472
22	10	CRYAA	0.0408642	0.000158613
22	11	CRYAA	0.0420053	0.000647447
22	12	CRYAA	0.0428551	0.000844987
22	13	CRYAA	0.0433566	0.000694278
22	14	CRYAA	0.0444008	0.00108623
22	15	CRYAA	0.0453107	0.00134391
22	16	CRYAA	0.0461696	0.00155058
22	17	CRYAA	0.0468364	0.00156511
22	18	CRYAA	0.0475016	0.00157814
22	19	CRYAA	0.0480184	0.0014427
22	20	CRYAA	0.0486487	0.00142074
22	21	CRYAA	0.04915	0.00126987
22	22	CRYAA	0.0498843	0.00135193
22	23	CRYAA	0.0499436	0.000758969
22	24	CRYAA	0.0505757	0.000738843
22	25	CRYAA	0.0515098	0.00102065
22	26	CRYAA	0.051716	0.000574644
22	27	CRYAA	0.0520956	0.000302055
22	28	CRYAA	0.0524502	4.38806e-06
22	29	CRYAA	0.0527606	-0.000337472
22	30	CRYAA	0.053238	-0.000512268
22	31	CRYAA	0.0539844	-0.000418147
22	32	CRYAA	0.0546119	-0.000442825
22	33	CRYAA	0.0547118	-0.000995202
22	34	CRYAA	0.0548427	-0.0015165
22	35	CRYAA	0.0554663	-0.0015451
22	36	CRYAA	0.0561177	-0.00154602
22	37	CRYAA	0.0567194	-0.00159649
22	38	CRYAA	0.058415	-0.000553141
22	39	CRYAA	0.0603384	0.000718019
22	40	CRYAA	0.0632017	0.00292906
23	1	CRYAA	-0.0094799	-0.000942528
23	2	CRYAA	-0.00902821	-0.000606267
23	3	CRYAA	-0.00870726	-0.00040076
23	4	CRYAA	-0.00845277	-0.000261708
23	5	CRYAA	-0.00840347	-0.000327846
23	6	CRYAA	-0.00813294	-0.000172746
23	7	CRYAA	-0.0079092	-6.44492e-05
23	8	CRYAA	-0.0075881	0.00014122
23	9	CRYAA	-0.00717209	0.00044179
23	10	CRYAA	-0.00714538	0.000353063
23	11	CRYAA	-0.00701991	0.000363104
23	12	CRYAA	-0.00677757	0.000490004
23	13	CRYAA	-0.00679888	0.000353256
23	14	CRYAA	-0.00685321	0.000183485
23	15	CRYAA	-0.00692559	-4.32732e-06
23	16	CRYAA	-0.00680033	5.49853e-06
23	17	CRYAA	-0.00675418	-6.37915e-05
23	18	CRYAA	-0.00678273	-0.000207778
23	19	CRYAA	-0.00649239	-3.2874e-05
23	20	CRYAA	-0.00627725	6.683e-05
23	21	CRYAA	-0.00630104	-7.2393e-05
23	22	CRYAA	-0.00617393	-6.07273e-05
23	23	CRYAA	-0.00624395	-0.000246177
23	24	CRYAA	-0.00620067	-0.000318336
23	25	CRYAA	-0.00589447	-0.000127576
23	26	CRYAA	-0.00585494	-0.000203482
23	27	CRYAA	-0.00556484	-2.88149e-05
23	28	CRYAA	-0.00540269	1.7902e-05
23	29	CRYAA	-0.00527174	3.34071e-05
23	30	CRYAA	-0.00533624	-0.000146529
23	31	CRYAA	-0.00526414	-0.000189858
23	32	CRYAA	-0.00522543	-0.00026659
23	33	CRYAA	-0.0051751	-0.000331693
23	34	CRYAA	-0.00446463	0.000263343
23	35	CRYAA	-0.00379698	0.000815554
23	36	CRYAA	-0.0027129	0.00178419
23	37	CRYAA	-0.000804463	0.0035772
23	38	CRYAA	0.0030378	0.00730402
23	39	CRYAA	0.00905619	0.013207
23	40	CRYAA	0.0172975	0.0213329
24	1	CRYAA	0.00452856	-0.00242106
24	2	CRYAA	0.00522012	-0.00180476
24	3	CRYAA	0.00673248	-0.00036766
24	4	CRYAA	0.00682263	-0.000352779
24	5	CRYAA	0.00687541	-0.000375262
24	6	CRYAA	0.00773501	0.000409081
24	7	CRYAA	0.00834833	0.000947135
24	8	CRYAA	0.00845682	0.000980367
24	9	CRYAA	0.00830293	0.000751212
24	10	CRYAA	0.00805622	0.000429241
24	11	CRYAA	0.0079394	0.000237163
24	12	CRYAA	0.00804536	0.000267859
24	13	CRYAA	0.00790099	4.82305e-05
24	14	CRYAA	0.00755199	-0.000376036
24	15	CRYAA	0.00744394	-0.000559343
24	16	CRYAA	0.00766871	-0.000409837
24	17	CRYAA	0.00768595	-0.000467862
24	18	CRYAA	0.007857	-0.00037207
24	19	CRYAA	0.00792662	-0.00037771
24	20	CRYAA	0.0082958	-8.37997e-05
24	21	CRYAA	0.00799719	-0.00045767
24	22	CRYAA	0.00778934	-0.000740778
24	23	CRYAA	0.00780877	-0.000796608
24	24	CRYAA	0.00796786	-0.000712783
24	25	CRYAA	0.00805527	-0.000700641
24	26	CRYAA	0.00871006	-0.00012111
24	27	CRYAA	0.00918491	0.00027848
24	28	CRYAA	0.00940576	0.000424068
24	29	CRYAA	0.00938345	0.000326492
24	30	CRYAA	0.0096677	0.000535489
24	31	CRYAA	0.0108446	0.00163713
24	32	CRYAA	0.0153509	0.00606821
24	33	CRYAA	0.0218281	0.0124701
24	34	CRYAA	0.0329313	0.023498
24	35	CRYAA	0.0546211	0.0451125
24	36	CRYAA	0.0944431	0.0848593
24	37	CRYAA	0.156371	0.146712
24	38	CRYAA	0.248249	0.238514
24	39	CRYAA	0.367811	0.358001
24	40	CRYAA	0.480758	0.470873
25	1	CRYAA	0.0882603	-0.00118181
25	2	CRYAA	0.0896612	-0.000278749
25	3	CRYAA	0.0902654	-0.000172562
25	4	CRYAA	0.0907384	-0.000197497
25	5	CRYAA	0.0913135	-0.000120352
25	6	CRYAA	0.0916644	-0.00026738
25	7	CRYAA	0.0917445	-0.000685199
25	8	CRYAA	0.0923882	-0.000539412
25	9	CRYAA	0.0930255	-0.000400047
25	10	CRYAA	0.0937116	-0.000211889
25	11	CRYAA	0.0946897	0.000268318
25	12	CRYAA	0.0951228	0.000203425
25	13	CRYAA	0.0956525	0.000235233
25	14	CRYAA	0.0964722	0.000556958
25	15	CRYAA	0.0966218	0.000208668
25	16	CRYAA	0.0970443	0.000133195
25	17	CRYAA	0.0983984	0.000989343
25	18	CRYAA	0.0987095	0.000802529
25	19	CRYAA	0.0988312	0.000426321
25	20	CRYAA	0.0995914	0.000688531
25	21	CRYAA	0.0999136	0.000512796
25	22	CRYAA	0.0999738	7.50533e-05
25	23	CRYAA	0.100423	2.67454e-05
25	24	CRYAA	0.101044	0.000149056
25	25	CRYAA	0.101294	-9.85849e-05
25	26	CRYAA	0.101834	-5.64651e-05
25	27	CRYAA	0.102039	-0.000349331
25	28	CRYAA	0.102408	-0.000478224
25	29	CRYAA	0.102682	-0.000702232
25	30	CRYAA	0.102964	-0.000918126
25	31	CRYAA	0.103353	-0.00102675
25	32	CRYAA	0.104297	-0.000581393
25	33	CRYAA	0.105186	-0.000190042
25	34	CRYAA	0.107593	0.00171932
25	35	CRYAA	0.111343	0.00497128
25	36	CRYAA	0.119066	0.0121964
25	37	CRYAA	0.132875	0.0255069
25	38	CRYAA	0.158557	0.0506912
25	39	CRYAA	0.206672	0.0983086
25	40	CRYAA	0.269939	0.161078
26	1	CRYAA	-0.0211837	-0.000158871
26	2	CRYAA	-0.0211203	-0.000292546
26	3	CRYAA	-0.0207083	-7.76367e-05
26	4	CRYAA	-0.0198643	0.00056928
26	5	CRYAA	-0.0197947	0.000441828
26	6	CRYAA	-0.0198459	0.00019357
26	7	CRYAA	-0.0196744	0.000167968
26	8	CRYAA	-0.019402	0.000243255
26	9	CRYAA	-0.0192266	0.000221624
26	10	CRYAA	-0.0188662	0.000384925
26	11	CRYAA	-0.0188059	0.000248126
26	12	CRYAA	-0.0186582	0.000198729
26	13	CRYAA	-0.0185107	0.000149159
26	14	CRYAA	-0.0184608	1.97078e-06
26	15	CRYAA	-0.0183411	-7.54059e-05
26	16	CRYAA	-0.0180654	3.22331e-06
26	17	CRYAA	-0.0180236	-0.000152064
26	18	CRYAA	-0.0180143	-0.000339883
26	19	CRYAA	-0.0181539	-0.000676556
26	20	CRYAA	-0.0181857	-0.000905483
26	21	CRYAA	-0.0177535	-0.000670345
26	22	CRYAA	-0.0172953	-0.000409162
26	23	CRYAA	-0.0173146	-0.00062563
26	24	CRYAA	-0.0174531	-0.000961197
26	25	CRYAA	-0.0175217	-0.00122687
26	26	CRYAA	-0.0171946	-0.00109686
26	27	CRYAA	-0.0165034	-0.000602727
26	28	CRYAA	-0.0163241	-0.000620538
26	29	CRYAA	-0.0155486	-4.20401e-05
26	30	CRYAA	-0.013769	0.00154045
26	31	CRYAA	-0.0109941	0.00411829
26	32	CRYAA	-0.00555374	0.00936153
26	33	CRYAA	0.00458564	0.0193038
26	34	CRYAA	0.025212	0.0397331
26	35	CRYAA	0.0638531	0.0781771
26	36	CRYAA	0.13714	0.151267
26	37	CRYAA	0.257841	0.271771
26	38	CRYAA	0.418822	0.432555
26	39	CRYAA	0.582513	0.596049
26	40	CRYAA	0.699597	0.712935
27	1	CRYAA	0.0151468	0.00168549
27	2	CRYAA	0.0150744	0.00144096
27	3	CRYAA	0.0146259	0.00082042
27	4	CRYAA	0.0145642	0.000586633
27	5	CRYAA	0.0147584	0.000608701
27	6	CRYAA	0.0148377	0.00051597
27	7	CRYAA	0.0150608	0.000567009
27	8	CRYAA	0.0151087	0.000442841
27	9	CRYAA	0.015237	0.000399025
27	10	CRYAA	0.0152753	0.000265262
27	11	CRYAA	0.015202	1.9876e-05
27	12	CRYAA	0.0151795	-0.000174688
27	13	CRYAA	0.0153028	-0.000223439
27	14	CRYAA	0.0153483	-0.000350039
27	15	CRYAA	0.0155702	-0.000300253
27	16	CRYAA	0.0156697	-0.000372759
27	17	CRYAA	0.015652	-0.000562559
27	18	CRYAA	0.0156552	-0.000731435
27	19	CRYAA	0.0157476	-0.000811101
27	20	CRYAA	0.0157758	-0.000954975
27	21	CRYAA	0.0158187	-0.00108416
27	22	CRYAA	0.0163049	-0.000770027
27	23	CRYAA	0.0168176	-0.000429407
27	24	CRYAA	0.0167233	-0.000695737
27	25	CRYAA	0.0167099	-0.00088122
27	26	CRYAA	0.0171759	-0.000587302
27	27	CRYAA	0.017325	-0.000610337
27	28	CRYAA	0.0173008	-0.000806617
27	29	CRYAA	0.0176656	-0.000613878
27	30	CRYAA	0.0187198	0.00026824
27	31	CRYAA	0.0204445	0.00182085
27	32	CRYAA	0.0234408	0.00464511
27	33	CRYAA	0.0288243	0.00985658
27	34	CRYAA	0.0397728	0.020633
27	35	CRYAA	0.0611235	0.0418116
27	36	CRYAA	0.102777	0.0832927
27	37	CRYAA	0.178948	0.159292
27	38	CRYAA	0.301255	0.281426
27	39	CRYAA	0.458067	0.438067
27	40	CRYAA	0.595645	0.575472
28	1	CRYAA	-0.0106068	-0.00162097
28	2	CRYAA	-0.010477	-0.00172206
28	3	CRYAA	-0.00903812	-0.000513978
28	4	CRYAA	-0.00839595	-0.000102653
28	5	CRYAA	-0.00812082	-5.83704e-05
28	6	CRYAA	-0.00778384	4.77698e-05
28	7	CRYAA	-0.00731051	0.000290256
28	8	CRYAA	-0.0068568	0.000513117
28	9	CRYAA	-0.00667038	0.000468693
28	10	CRYAA	-0.00662199	0.000286244
28	11	CRYAA	-0.00617511	0.000502274
28	12	CRYAA	-0.00604659	0.000399958
28	13	CRYAA	-0.00580869	0.000407009
28	14	CRYAA	-0.0059771	7.75815e-06
28	15	CRYAA	-0.00602299	-0.000268974
28	16	CRYAA	-0.00555762	-3.4449e-05
28	17	CRYAA	-0.00538083	-8.85065e-05
28	18	CRYAA	-0.00528369	-0.000222213
28	19	CRYAA	-0.00506321	-0.000232571
28	20	CRYAA	-0.00490676	-0.000306968
28	21	CRYAA	-0.00453321	-0.000164266
28	22	CRYAA	-0.00417766	-3.95579e-05
28	23	CRYAA	-0.00420702	-0.000299763
28	24	CRYAA	-0.0042071	-0.000530684
28	25	CRYAA	-0.00419177	-0.000746201
28	26	CRYAA	-0.00379255	-0.000577822
28	27	CRYAA	-0.00362459	-0.000640709
28	28	CRYAA	-0.00379222	-0.00103918
28	29	CRYAA	-0.00374878	-0.00122658
28	30	CRYAA	-0.00267103	-0.000379682
28	31	CRYAA	-0.0011102	0.000950308
28	32	CRYAA	0.00177008	0.00359974
28	33	CRYAA	0.00724242	0.00884124
28	34	CRYAA	0.0173377	0.0187057
28	35	CRYAA	0.036455	0.0375921
28	36	CRYAA	0.0726397	0.073546
28	37	CRYAA	0.138417	0.139092
28	38	CRYAA	0.248429	0.248874
28	39	CRYAA	0.398964	0.399178
28	40	CRYAA	0.537721	0.537704
29	1	CRYAA	-0.0249443	-0.000491351
29	2	CRYAA	-0.0244331	-0.00017883
29	3	CRYAA	-0.0240476	7.96456e-06
29	4	CRYAA	-0.0232744	0.000582472
29	5	CRYAA	-0.023148	0.000510215
29	6	CRYAA	-0.0233379	0.000121616
29	7	CRYAA	-0.0232747	-1.38549e-05
29	8	CRYAA	-0.0225364	0.000525726
29	9	CRYAA	-0.0222742	0.00058921
29	10	CRYAA	-0.0224589	0.000205852
29	11	CRYAA	-0.0224908	-2.47275e-05
29	12	CRYAA	-0.0221262	0.000141123
29	13	CRYAA	-0.0219662	0.000102504
29	14	CRYAA	-0.0219574	-8.73938e-05
29	15	CRYAA	-0.022044	-0.000372694
29	16	CRYAA	-0.0219035	-0.000430901
29	17	CRYAA	-0.021429	-0.000155082
29	18	CRYAA	-0.0213609	-0.000285632
29	19	CRYAA	-0.0211698	-0.000293268
29	20	CRYAA	-0.0211939	-0.000516024
29	21	CRYAA	-0.0212077	-0.000728523
29	22	CRYAA	-0.0207715	-0.00049097
29	23	CRYAA	-0.0204941	-0.000412287
29	24	CRYAA	-0.0203542	-0.000471048
29	25	CRYAA	-0.020365	-0.000680555
29	26	CRYAA	-0.0200067	-0.000520942
29	27	CRYAA	-0.0195787	-0.000291596
29	28	CRYAA	-0.0194877	-0.000399301
29	29	CRYAA	-0.0194044	-0.000514687
29	30	CRYAA	-0.0191858	-0.000494819
29	31	CRYAA	-0.0183684	0.000123904
29	32	CRYAA	-0.0172102	0.00108339
29	33	CRYAA	-0.0149046	0.00319033
29	34	CRYAA	-0.0111566	0.00673965
29	35	CRYAA	-0.00355476	0.0141428
29	36	CRYAA	0.00978889	0.0272878
29	37	CRYAA	0.0358228	0.053123
29	38	CRYAA	0.0852432	0.102345
29	39	CRYAA	0.171802	0.188704
29	40	CRYAA	0.27943	0.296134
30	1	CRYAA	0.0105259	-0.00398937
30	2	CRYAA	0.0116683	-0.00332196
30	3	CRYAA	0.0135759	-0.00188939
30	4	CRYAA	0.0149686	-0.000971587
30	5	CRYAA	0.0160687	-0.00034654
30	6	CRYAA	0.0172453	0.000355148
30	7	CRYAA	0.0177583	0.000393123
30	8	CRYAA	0.0183392	0.000499072
30	9	CRYAA	0.018768	0.000452881
30	10	CRYAA	0.0196574	0.000867329
30	11	CRYAA	0.0205208	0.00125575
30	12	CRYAA	0.0205682	0.000828168
30	13	CRYAA	0.0208393	0.000624243
30	14	CRYAA	0.0214219	0.000731934
30	15	CRYAA	0.0217073	0.00054236
30	16	CRYAA	0.0217745	0.000134551
30	17	CRYAA	0.0225581	0.000443231
30	18	CRYAA	0.0226293	3.93673e-05
30	19	CRYAA	0.0229407	-0.000124212
30	20	CRYAA	0.0236189	7.90948e-05
30	21	CRYAA	0.0238813	-0.000133526
30	22	CRYAA	0.0242539	-0.000235926
30	23	CRYAA	0.0245825	-0.000382316
30	24	CRYAA	0.0244897	-0.000950043
30	25	CRYAA	0.0246473	-0.00126739
30	26	CRYAA	0.024949	-0.00144074
30	27	CRYAA	0.0258129	-0.00105174
30	28	CRYAA	0.0261842	-0.0011555
30	29	CRYAA	0.0262503	-0.00156431
30	30	CRYAA	0.0268679	-0.0014217
30	31	CRYAA	0.028267	-0.000497576
30	32	CRYAA	0.0306655	0.00142592
30	33	CRYAA	0.0344748	0.00476032
30	34	CRYAA	0.0413441	0.0111546
30	35	CRYAA	0.0550837	0.0244192
30	36	CRYAA	0.0809332	0.0497937
30	37	CRYAA	0.129378	0.0977638
30	38	CRYAA	0.215095	0.183006
30	39	CRYAA	0.348107	0.315543
30	40	CRYAA	0.485917	0.452878
31	1	CRYAA	-0.0136234	-0.00137841
31	2	CRYAA	-0.0130039	-0.00105141
31	3	CRYAA	-0.0119838	-0.000323741
31	4	CRYAA	-0.0110639	0.000303662
31	5	CRYAA	-0.010756	0.000319132
31	6	CRYAA	-0.0104926	0.000290013
31	7	CRYAA	-0.0102485	0.000241662
31	8	CRYAA	-0.0100677	0.000130011
31	9	CRYAA	-0.00997754	-7.23162e-05
31	10	CRYAA	-0.0092908	0.000321957
31	11	CRYAA	-0.00884893	0.000471365
31	12	CRYAA	-0.00860818	0.000419647
31	13	CRYAA	-0.00843328	0.000302076
31	14	CRYAA	-0.00848743	-4.45444e-05
31	15	CRYAA	-0.00840973	-0.000259309
31	16	CRYAA	-0.00832026	-0.000462304
31	17	CRYAA	-0.00791735	-0.000351856
31	18	CRYAA	-0.00773746	-0.000464435
31	19	CRYAA	-0.00701987	-3.93135e-05
31	20	CRYAA	-0.00680021	-0.000112126
31	21	CRYAA	-0.00709726	-0.000701636
31	22	CRYAA	-0.00721309	-0.00110993
31	23	CRYAA	-0.00669493	-0.000884237
31	24	CRYAA	-0.00599889	-0.000480664
31	25	CRYAA	-0.00598393	-0.000758173
31	26	CRYAA	-0.0058258	-0.000892508
31	27	CRYAA	-0.00446352	0.000177298
31	28	CRYAA	-0.00353278	0.000815569
31	29	CRYAA	-0.000891181	0.00316471
31	30	CRYAA	0.00408379	0.00784721
31	31	CRYAA	0.0132873	0.0167583
31	32	CRYAA	0.0309291	0.0341076
31	33	CRYAA	0.0632955	0.0661815
31	34	CRYAA	0.122955	0.125549
31	35	CRYAA	0.219791	0.222092
31	36	CRYAA	0.34434	0.346349
31	37	CRYAA	0.487307	0.489023
31	38	CRYAA	0.629917	0.631341
31	39	CRYAA	0.751635	0.752766
31	40	CRYAA	0.833596	0.834435
32	1	CRYAA	-0.00755412	-0.00409707
32	2	CRYAA	-0.00710038	-0.00385289
32	3	CRYAA	-0.00478363	-0.0017457
32	4	CRYAA	-0.00304711	-0.000218741
32	5	CRYAA	-0.00254692	7.18979e-05
32	6	CRYAA	-0.00220582	0.000203432
32	7	CRYAA	-0.00152489	0.000674804
32	8	CRYAA	-0.00147806	0.00051208
32	9	CRYAA	-0.00135963	0.00042095
32	10	CRYAA	-0.00101588	0.000555141
32	11	CRYAA	-0.00100963	0.000351841
32	12	CRYAA	-0.000769373	0.000382537
32	13	CRYAA	-0.000539607	0.000402746
32	14	CRYAA	-0.000541357	0.000191438
32	15	CRYAA	-0.000501869	2.13679e-05
32	16	CRYAA	0.000149428	0.000463108
32	17	CRYAA	1.92258e-05	0.000123348
32	18	CRYAA	-8.42999e-05	-0.000189736
32	19	CRYAA	0.000333436	1.84427e-05
32	20	CRYAA	0.000379556	-0.000144995
32	21	CRYAA	0.000385394	-0.000348715
32	22	CRYAA	0.000660805	-0.000282862
32	23	CRYAA	0.000714924	-0.0004383
32	24	CRYAA	0.00120697	-0.000155808
32	25	CRYAA	0.00132756	-0.000244783
32	26	CRYAA	0.00113785	-0.000644052
32	27	CRYAA	0.00100936	-0.000982093
32	28	CRYAA	0.00125047	-0.000950542
32	29	CRYAA	0.00158807	-0.000822501
32	30	CRYAA	0.00187596	-0.000744166
32	31	CRYAA	0.00259826	-0.000231427
32	32	CRYAA	0.00398436	0.000945121
32	33	CRYAA	0.00605497	0.00280617
32	34	CRYAA	0.00971818	0.00625982
32	35	CRYAA	0.0175335	0.0138656
32	36	CRYAA	0.0321858	0.0283083
32	37	CRYAA	0.0599819	0.0558949
32	38	CRYAA	0.111479	0.107182
32	39	CRYAA	0.203234	0.198728
32	40	CRYAA	0.315422	0.310706
33	1	CRYAA	-0.0215699	-0.000334411
33	2	CRYAA	-0.0214575	-0.000410519
33	3	CRYAA	-0.020338	0.000520421
33	4	CRYAA	-0.0201003	0.000569675
33	5	CRYAA	-0.0199207	0.000560726
33	6	CRYAA	-0.0197341	0.000558848
33	7	CRYAA	-0.0200506	5.37488e-05
33	8	CRYAA	-0.020092	-0.000176093
33	9	CRYAA	-0.0195737	0.000153685
33	10	CRYAA	-0.0193104	0.0002284
33	11	CRYAA	-0.0191716	0.000178731
33	12	CRYAA	-0.018518	0.000643829
33	13	CRYAA	-0.0186049	0.000368381
33	14	CRYAA	-0.0187103	7.45053e-05
33	15	CRYAA	-0.0185387	5.75418e-05
33	16	CRYAA	-0.0184812	-7.34361e-05
33	17	CRYAA	-0.0184508	-0.00023161
33	18	CRYAA	-0.0184639	-0.000433169
33	19	CRYAA	-0.0181925	-0.000350314
33	20	CRYAA	-0.0180321	-0.000378371
33	21	CRYAA	-0.0184641	-0.000998975
33	22	CRYAA	-0.0184356	-0.00115894
33	23	CRYAA	-0.0175186	-0.000430409
33	24	CRYAA	-0.0173942	-0.000494587
33	25	CRYAA	-0.017373	-0.000661907
33	26	CRYAA	-0.0171526	-0.000629974
33	27	CRYAA	-0.0171741	-0.00083999
33	28	CRYAA	-0.0171088	-0.000963187
33	29	CRYAA	-0.0171964	-0.00123931
33	30	CRYAA	-0.0170123	-0.00124377
33	31	CRYAA	-0.0160998	-0.000519819
33	32	CRYAA	-0.0155577	-0.00016623
33	33	CRYAA	-0.0150463	0.000156741
33	34	CRYAA	-0.0131938	0.00182073
33	35	CRYAA	-0.00978184	0.00504413
33	36	CRYAA	-0.00402312	0.0106143
33	37	CRYAA	0.00766508	0.022114
33	38	CRYAA	0.0310892	0.0453496
33	39	CRYAA	0.0758091	0.089881
33	40	CRYAA	0.1368	0.150683
34	1	CRYAA	-0.0144403	-0.00385818
34	2	CRYAA	-0.0135775	-0.00328957
34	3	CRYAA	-0.0117793	-0.00178564
34	4	CRYAA	-0.0104846	-0.000785146
34	5	CRYAA	-0.00966106	-0.000255836
34	6	CRYAA	-0.00918979	-7.87916e-05
34	7	CRYAA	-0.00863197	0.000184816
34	8	CRYAA	-0.00799073	0.000531838
34	9	CRYAA	-0.00725726	0.000971089
34	10	CRYAA	-0.00712862	0.000805501
34	11	CRYAA	-0.00700079	0.000639119
34	12	CRYAA	-0.00664551	0.000700178
34	13	CRYAA	-0.00628792	0.000763544
34	14	CRYAA	-0.00619489	0.000562357
34	15	CRYAA	-0.0062023	0.000260725
34	16	CRYAA	-0.00566757	0.000501237
34	17	CRYAA	-0.00542474	0.00044985
34	18	CRYAA	-0.00532433	0.000256044
34	19	CRYAA	-0.00537175	-8.55968e-05
34	20	CRYAA	-0.00509612	-0.000104183
34	21	CRYAA	-0.00505578	-0.000358065
34	22	CRYAA	-0.00464233	-0.000238833
34	23	CRYAA	-0.00461101	-0.000501736
34	24	CRYAA	-0.00436194	-0.000546888
34	25	CRYAA	-0.00440871	-0.000887868
34	26	CRYAA	-0.00421751	-0.000990888
34	27	CRYAA	-0.00400492	-0.00107253
34	28	CRYAA	-0.00399832	-0.00136014
34	29	CRYAA	-0.00352702	-0.00118306
34	30	CRYAA	-0.00280073	-0.000750991
34	31	CRYAA	-0.00200705	-0.000251524
34	32	CRYAA	-0.000558837	0.000902465
34	33	CRYAA	0.00254187	0.00370896
34	34	CRYAA	0.00768729	0.00856016
34	35	CRYAA	0.018553	0.0191316
34	36	CRYAA	0.0404955	0.0407799
34	37	CRYAA	0.0816565	0.0816467
34	38	CRYAA	0.157366	0.157062
34	39	CRYAA	0.279557	0.278958
34	40	CRYAA	0.412362	0.41147
35	1	CRYAA	-0.0143829	-0.000738805
35	2	CRYAA	-0.0137981	-0.000302412
35	3	CRYAA	-0.0132469	0.000100277
35	4	CRYAA	-0.0132404	-4.16121e-05
35	5	CRYAA	-0.0130041	4.62871e-05
35	6	CRYAA	-0.0121678	0.000734111
35	7	CRYAA	-0.0122357	0.000517818
35	8	CRYAA	-0.0123888	0.000216297
35	9	CRYAA	-0.012433	2.36834e-05
35	10	CRYAA	-0.0123829	-7.46624e-05
35	11	CRYAA	-0.0119265	0.000233233
35	12	CRYAA	-0.0121635	-0.000152189
35	13	CRYAA	-0.012272	-0.000409089
35	14	CRYAA	-0.0119361	-0.000221611
35	15	CRYAA	-0.0115303	3.57948e-05
35	16	CRYAA	-0.011321	9.65861e-05
35	17	CRYAA	-0.0112439	2.53316e-05
35	18	CRYAA	-0.01131	-0.000189228
35	19	CRYAA	-0.0115636	-0.000591237
35	20	CRYAA	-0.0115719	-0.000747988
35	21	CRYAA	-0.0110261	-0.000350656
35	22	CRYAA	-0.0110072	-0.000480174
35	23	CRYAA	-0.0110139	-0.000635314
35	24	CRYAA	-0.0105387	-0.000308553
35	25	CRYAA	-0.0105021	-0.000420393
35	26	CRYAA	-0.0104066	-0.000473264
35	27	CRYAA	-0.00954556	0.000239335
35	28	CRYAA	-0.00912063	0.000515832
35	29	CRYAA	-0.00717665	0.00231139
35	30	CRYAA	-0.00310457	0.00623503
35	31	CRYAA	0.00400629	0.0131975
35	32	CRYAA	0.0168057	0.0258485
35	33	CRYAA	0.0423191	0.0512134
35	34	CRYAA	0.0900819	0.0988278
35	35	CRYAA	0.17234	0.180937
35	36	CRYAA	0.29147	0.299919
35	37	CRYAA	0.425457	0.433758
35	38	CRYAA	0.544242	0.552395
35	39	CRYAA	0.63633	0.644333
35	40	CRYAA	0.695617	0.703473
36	1	CRYAA	-0.0216799	0.000586083
36	2	CRYAA	-0.0218224	0.000368069
36	3	CRYAA	-0.0219293	0.000185737
36	4	CRYAA	-0.0219811	5.84634e-05
36	5	CRYAA	-0.0220475	-8.33055e-05
36	6	CRYAA	-0.02198	-9.12415e-05
36	7	CRYAA	-0.021621	0.000192241
36	8	CRYAA	-0.02149	0.000247758
36	9	CRYAA	-0.0212328	0.000429582
36	10	CRYAA	-0.0209183	0.000668574
36	11	CRYAA	-0.0209157	0.000595767
36	12	CRYAA	-0.0212026	0.00023337
36	13	CRYAA	-0.021406	-4.54449e-05
36	14	CRYAA	-0.0217496	-0.000464523
36	15	CRYAA	-0.0217241	-0.000514437
36	16	CRYAA	-0.021195	-6.07964e-05
36	17	CRYAA	-0.0210835	-2.47236e-05
36	18	CRYAA	-0.0209795	3.83335e-06
36	19	CRYAA	-0.02094	-3.21969e-05
36	20	CRYAA	-0.0209901	-0.000157735
36	21	CRYAA	-0.0209975	-0.000240534
36	22	CRYAA	-0.0210312	-0.000349673
36	23	CRYAA	-0.0209927	-0.000386676
36	24	CRYAA	-0.0209468	-0.000416209
36	25	CRYAA	-0.0206129	-0.000157809
36	26	CRYAA	-0.0206437	-0.000264026
36	27	CRYAA	-0.0208768	-0.000572589
36	28	CRYAA	-0.0209354	-0.000706574
36	29	CRYAA	-0.0207412	-0.000587839
36	30	CRYAA	-0.0205546	-0.000476705
36	31	CRYAA	-0.0203337	-0.000331237
36	32	CRYAA	-0.0200214	-9.44347e-05
36	33	CRYAA	-0.0196662	0.000185341
36	34	CRYAA	-0.018788	0.000988078
36	35	CRYAA	-0.0174307	0.00226996
36	36	CRYAA	-0.0146737	0.00495146
36	37	CRYAA	-0.00936585	0.0101839
36	38	CRYAA	0.000913298	0.0203876
36	39	CRYAA	0.0212786	0.0406774
36	40	CRYAA	0.0495936	0.068917
37	1	beta-actin	0.0523293	-0.000509979
37	2	beta-actin	0.054596	-0.000656691
37	3	beta-actin	0.0579695	0.000303302
37	4	beta-actin	0.0604373	0.000357669
37	5	beta-actin	0.0625357	4.26632e-05
37	6	beta-actin	0.064782	-0.000124546
37	7	beta-actin	0.0667618	-0.000558195
37	8	beta-actin	0.0688759	-0.000857488
37	9	beta-actin	0.0715522	-0.000594701
37	10	beta-actin	0.0759916	0.0014313
37	11	beta-actin	0.0840136	0.00703983
37	12	beta-actin	0.0967373	0.0173501
37	13	beta-actin	0.120133	0.0383327
37	14	beta-actin	0.162115	0.0779011
37	15	beta-actin	0.237309	0.150682
37	16	beta-actin	0.361949	0.272908
37	17	beta-actin	0.549732	0.458278
37	18	beta-actin	0.79331	0.699442
37	19	beta-actin	1.05206	0.955776
37	20	beta-actin	1.27241	1.17371
37	21	beta-actin	1.42901	1.3279
37	22	beta-actin	1.52657	1.42305
37	23	beta-actin	1.58138	1.47544
37	24	beta-actin	1.61311	1.50476
37	25	beta-actin	1.63212	1.52136
37	26	beta-actin	1.64508	1.53191
37	27	beta-actin	1.65559	1.54
37	28	beta-actin	1.66322	1.54522
37	29	beta-actin	1.6679	1.54748
37	30	beta-actin	1.67275	1.54992
37	31	beta-actin	1.67686	1.55162
37	32	beta-actin	1.68001	1.55235
37	33	beta-actin	1.681	1.55093
37	34	beta-actin	1.67994	1.54745
37	35	beta-actin	1.67835	1.54345
37	36	beta-actin	1.67684	1.53953
37	37	beta-actin	1.67553	1.5358
37	38	beta-actin	1.67464	1.5325
37	39	beta-actin	1.67292	1.52837
37	40	beta-actin	1.67101	1.52405
38	1	beta-actin	0.00644583	0.00182715
38	2	beta-actin	0.00704773	0.00176323
38	3	beta-actin	0.00764927	0.00169895
38	4	beta-actin	0.0073423	0.000726164
38	5	beta-actin	0.00714189	-0.000140062
38	6	beta-actin	0.0071616	-0.00078617
38	7	beta-actin	0.00763238	-0.000981208
38	8	beta-actin	0.00807419	-0.00120521
38	9	beta-actin	0.00862169	-0.00132352
38	10	beta-actin	0.00968828	-0.000922752
38	11	beta-actin	0.0114174	0.000140546
38	12	beta-actin	0.0147359	0.00279327
38	13	beta-actin	0.0203614	0.0077529
38	14	beta-actin	0.0311854	0.0179111
38	15	beta-actin	0.0523362	0.0383961
38	16	beta-actin	0.0908914	0.0762855
38	17	beta-actin	0.160321	0.145049
38	18	beta-actin	0.279707	0.263769
38	19	beta-actin	0.465276	0.448673
38	20	beta-actin	0.714783	0.697514
38	21	beta-actin	0.991041	0.973106
38	22	beta-actin	1.23347	1.21487
38	23	beta-actin	1.40699	1.38773
38	24	beta-actin	1.51481	1.49488
38	25	beta-actin	1.57434	1.55374
38	26	beta-actin	1.60744	1.58617
38	27	beta-actin	1.62663	1.6047
38	28	beta-actin	1.63809	1.6155
38	29	beta-actin	1.6468	1.62354
38	30	beta-actin	1.65175	1.62783
38	31	beta-actin	1.65557	1.63098
38	32	beta-actin	1.65905	1.63379
38	33	beta-actin	1.6621	1.63618
38	34	beta-actin	1.66397	1.63738
38	35	beta-actin	1.66423	1.63697
38	36	beta-actin	1.66262	1.63469
38	37	beta-actin	1.65906	1.63047
38	38	beta-actin	1.65751	1.62826
38	39	beta-actin	1.65662	1.6267
38	40	beta-actin	1.65471	1.62413
39	1	beta-actin	0.0154404	0.00264188
39	2	beta-actin	0.0157614	0.00235222
39	3	beta-actin	0.0158349	0.00181503
39	4	beta-actin	0.015379	0.000748426
39	5	beta-actin	0.0149159	-0.000325335
39	6	beta-actin	0.0150115	-0.000840454
39	7	beta-actin	0.0157577	-0.000704933
39	8	beta-actin	0.0158732	-0.0012001
39	9	beta-actin	0.0160047	-0.00167926
39	10	beta-actin	0.0172227	-0.00107188
39	11	beta-actin	0.0194092	0.000503947
39	12	beta-actin	0.0222705	0.00275455
39	13	beta-actin	0.0278076	0.00768098
39	14	beta-actin	0.0379729	0.0172356
39	15	beta-actin	0.057908	0.0365601
39	16	beta-actin	0.0939333	0.0719747
39	17	beta-actin	0.159276	0.136707
39	18	beta-actin	0.271374	0.248194
39	19	beta-actin	0.446601	0.42281
39	20	beta-actin	0.688472	0.664071
39	21	beta-actin	0.96173	0.936718
39	22	beta-actin	1.20746	1.18184
39	23	beta-actin	1.38832	1.36208
39	24	beta-actin	1.50174	1.4749
39	25	beta-actin	1.56554	1.53809
39	26	beta-actin	1.60254	1.57447
39	27	beta-actin	1.62349	1.59481
39	28	beta-actin	1.63504	1.60575
39	29	beta-actin	1.64281	1.61291
39	30	beta-actin	1.64908	1.61857
39	31	beta-actin	1.65519	1.62407
39	32	beta-actin	1.65858	1.62685
39	33	beta-actin	1.66116	1.62882
39	34	beta-actin	1.66478	1.63182
39	35	beta-actin	1.6643	1.63074
39	36	beta-actin	1.6639	1.62972
39	37	beta-actin	1.66235	1.62757
39	38	beta-actin	1.66044	1.62505
39	39	beta-actin	1.65754	1.62153
39	40	beta-actin	1.65589	1.61927
40	1	beta-actin	0.0158834	0.000406253
40	2	beta-actin	0.0159495	-1.79098e-05
40	3	beta-actin	0.0166539	0.00019626
40	4	beta-actin	0.0169379	-9.98207e-06
40	5	beta-actin	0.0174266	-1.15363e-05
40	6	beta-actin	0.0180401	0.00011164
40	7	beta-actin	0.0183214	-9.73257e-05
40	8	beta-actin	0.0185259	-0.000383032
40	9	beta-actin	0.0187544	-0.000644764
40	10	beta-actin	0.0207282	0.000838741
40	11	beta-actin	0.0257018	0.00532206
40	12	beta-actin	0.0344555	0.0135855
40	13	beta-actin	0.0486816	0.0273214
40	14	beta-actin	0.076806	0.0549556
40	15	beta-actin	0.127374	0.105033
40	16	beta-actin	0.217307	0.194476
40	17	beta-actin	0.366719	0.343398
40	18	beta-actin	0.585263	0.561451
40	19	beta-actin	0.857431	0.833129
40	20	beta-actin	1.13269	1.1079
40	21	beta-actin	1.35505	1.32976
40	22	beta-actin	1.50748	1.48171
40	23	beta-actin	1.59878	1.57252
40	24	beta-actin	1.64669	1.61993
40	25	beta-actin	1.67284	1.6456
40	26	beta-actin	1.68931	1.66158
40	27	beta-actin	1.70106	1.67283
40	28	beta-actin	1.70887	1.68016
40	29	beta-actin	1.71522	1.68601
40	30	beta-actin	1.71982	1.69013
40	31	beta-actin	1.72299	1.69281
40	32	beta-actin	1.72508	1.6944
40	33	beta-actin	1.72463	1.69347
40	34	beta-actin	1.72397	1.69232
40	35	beta-actin	1.72406	1.69191
40	36	beta-actin	1.72426	1.69162
40	37	beta-actin	1.72295	1.68982
40	38	beta-actin	1.7212	1.68758
40	39	beta-actin	1.72126	1.68715
40	40	beta-actin	1.71948	1.68489
41	1	beta-actin	0.137848	0.00448678
41	2	beta-actin	0.137599	0.00380686
41	3	beta-actin	0.136502	0.00227878
41	4	beta-actin	0.135965	0.00131041
41	5	beta-actin	0.135389	0.000303471
41	6	beta-actin	0.134555	-0.000961869
41	7	beta-actin	0.133738	-0.00220933
41	8	beta-actin	0.133781	-0.00259787
41	9	beta-actin	0.135127	-0.00168244
41	10	beta-actin	0.136553	-0.000687748
41	11	beta-actin	0.138187	0.000515498
41	12	beta-actin	0.141834	0.00373109
41	13	beta-actin	0.149341	0.0108069
41	14	beta-actin	0.162947	0.0239821
41	15	beta-actin	0.188141	0.0487452
41	16	beta-actin	0.233841	0.0940138
41	17	beta-actin	0.312727	0.17247
41	18	beta-actin	0.44146	0.300771
41	19	beta-actin	0.630183	0.489063
41	20	beta-actin	0.864255	0.722704
41	21	beta-actin	1.09711	0.955131
41	22	beta-actin	1.28454	1.14212
41	23	beta-actin	1.41305	1.2702
41	24	beta-actin	1.48952	1.34625
41	25	beta-actin	1.53478	1.39107
41	26	beta-actin	1.56124	1.41711
41	27	beta-actin	1.57801	1.43344
41	28	beta-actin	1.58963	1.44463
41	29	beta-actin	1.5996	1.45417
41	30	beta-actin	1.60513	1.45927
41	31	beta-actin	1.61011	1.46381
41	32	beta-actin	1.6137	1.46698
41	33	beta-actin	1.61748	1.47033
41	34	beta-actin	1.61908	1.47149
41	35	beta-actin	1.61928	1.47126
41	36	beta-actin	1.61608	1.46763
41	37	beta-actin	1.61396	1.46508
41	38	beta-actin	1.61334	1.46403
41	39	beta-actin	1.61314	1.4634
41	40	beta-actin	1.61063	1.46046
42	1	beta-actin	0.0433779	0.000182535
42	2	beta-actin	0.0442945	-0.00016213
42	3	beta-actin	0.0465043	0.000786511
42	4	beta-actin	0.0477167	0.000737642
42	5	beta-actin	0.0489408	0.000700507
42	6	beta-actin	0.0490935	-0.000407998
42	7	beta-actin	0.0495077	-0.00125499
42	8	beta-actin	0.0502766	-0.00174735
42	9	beta-actin	0.0516255	-0.00165961
42	10	beta-actin	0.0545089	-3.7417e-05
42	11	beta-actin	0.0586903	0.0028827
42	12	beta-actin	0.065483	0.00841423
42	13	beta-actin	0.0776205	0.0192905
42	14	beta-actin	0.0983533	0.0387621
42	15	beta-actin	0.138323	0.0774701
42	16	beta-actin	0.207239	0.145125
42	17	beta-actin	0.324673	0.261298
42	18	beta-actin	0.507614	0.442978
42	19	beta-actin	0.749459	0.683562
42	20	beta-actin	1.01377	0.946609
42	21	beta-actin	1.24631	1.17789
42	22	beta-actin	1.41156	1.34188
42	23	beta-actin	1.51048	1.43954
42	24	beta-actin	1.56726	1.49506
42	25	beta-actin	1.59999	1.52653
42	26	beta-actin	1.61875	1.54403
42	27	beta-actin	1.63102	1.55503
42	28	beta-actin	1.63952	1.56227
42	29	beta-actin	1.64769	1.56918
42	30	beta-actin	1.65413	1.57436
42	31	beta-actin	1.65951	1.57848
42	32	beta-actin	1.66331	1.58101
42	33	beta-actin	1.66436	1.5808
42	34	beta-actin	1.66464	1.57982
42	35	beta-actin	1.66417	1.57809
42	36	beta-actin	1.66125	1.57391
42	37	beta-actin	1.65868	1.57008
42	38	beta-actin	1.65817	1.56831
42	39	beta-actin	1.65651	1.56538
42	40	beta-actin	1.65326	1.56088
43	1	beta-actin	0.0153466	-0.000227792
43	2	beta-actin	0.0163934	-0.000373564
43	3	beta-actin	0.0182024	0.000242789
43	4	beta-actin	0.0195374	0.000385227
43	5	beta-actin	0.0209208	0.000575986
43	6	beta-actin	0.021329	-0.00020841
43	7	beta-actin	0.0218049	-0.000925137
43	8	beta-actin	0.0230329	-0.000889797
43	9	beta-actin	0.0247708	-0.000344527
43	10	beta-actin	0.0263141	6.23144e-06
43	11	beta-actin	0.0286582	0.00115764
43	12	beta-actin	0.0343243	0.00563111
43	13	beta-actin	0.0423819	0.0124961
43	14	beta-actin	0.0572268	0.0261484
43	15	beta-actin	0.0856606	0.0533896
43	16	beta-actin	0.137193	0.103729
43	17	beta-actin	0.226902	0.192246
43	18	beta-actin	0.376263	0.340414
43	19	beta-actin	0.595077	0.558036
43	20	beta-actin	0.86799	0.829756
43	21	beta-actin	1.14448	1.10505
43	22	beta-actin	1.367	1.32639
43	23	beta-actin	1.51339	1.47158
43	24	beta-actin	1.60197	1.55896
43	25	beta-actin	1.65188	1.60768
43	26	beta-actin	1.67841	1.63302
43	27	beta-actin	1.69444	1.64786
43	28	beta-actin	1.70458	1.6568
43	29	beta-actin	1.71109	1.66212
43	30	beta-actin	1.71648	1.66632
43	31	beta-actin	1.72068	1.66933
43	32	beta-actin	1.7228	1.67026
43	33	beta-actin	1.72289	1.66915
43	34	beta-actin	1.72442	1.66949
43	35	beta-actin	1.72495	1.66882
43	36	beta-actin	1.72245	1.66514
43	37	beta-actin	1.7172	1.65869
43	38	beta-actin	1.71381	1.65411
43	39	beta-actin	1.71324	1.65235
43	40	beta-actin	1.71043	1.64834
44	1	beta-actin	0.000690999	0.00285362
44	2	beta-actin	0.000780509	0.00251224
44	3	beta-actin	-7.42777e-05	0.00122656
44	4	beta-actin	-0.000272735	0.000597209
44	5	beta-actin	-5.86302e-05	0.000380422
44	6	beta-actin	0.000218873	0.000227034
44	7	beta-actin	0.000108475	-0.000314257
44	8	beta-actin	3.72021e-05	-0.000816421
44	9	beta-actin	9.13259e-05	-0.00119319
44	10	beta-actin	0.000469823	-0.00124558
44	11	beta-actin	0.00149345	-0.000652849
44	12	beta-actin	0.00192036	-0.000656832
44	13	beta-actin	0.00254592	-0.000462159
44	14	beta-actin	0.00342572	-1.32517e-05
44	15	beta-actin	0.00679319	0.00292332
44	16	beta-actin	0.013366	0.00906529
44	17	beta-actin	0.025533	0.0208013
44	18	beta-actin	0.0463268	0.0411642
44	19	beta-actin	0.086383	0.0807895
44	20	beta-actin	0.159056	0.153032
44	21	beta-actin	0.284113	0.277658
44	22	beta-actin	0.477459	0.470573
44	23	beta-actin	0.733271	0.725954
44	24	beta-actin	1.01018	1.00243
44	25	beta-actin	1.24955	1.24137
44	26	beta-actin	1.41972	1.41111
44	27	beta-actin	1.52449	1.51545
44	28	beta-actin	1.58482	1.57535
44	29	beta-actin	1.61982	1.60992
44	30	beta-actin	1.6397	1.62937
44	31	beta-actin	1.65143	1.64066
44	32	beta-actin	1.65991	1.64872
44	33	beta-actin	1.66607	1.65444
44	34	beta-actin	1.6709	1.65885
44	35	beta-actin	1.67448	1.66199
44	36	beta-actin	1.6773	1.66438
44	37	beta-actin	1.67638	1.66303
44	38	beta-actin	1.67307	1.65929
44	39	beta-actin	1.67335	1.65914
44	40	beta-actin	1.67184	1.6572
45	1	beta-actin	0.0280115	-0.003277
45	2	beta-actin	0.0297861	-0.00310549
45	3	beta-actin	0.0336171	-0.000877536
45	4	beta-actin	0.0366476	0.000549949
45	5	beta-actin	0.0381378	0.000437157
45	6	beta-actin	0.0400789	0.000775144
45	7	beta-actin	0.0412434	0.000336613
45	8	beta-actin	0.0428639	0.000354101
45	9	beta-actin	0.0438588	-0.000254084
45	10	beta-actin	0.0443637	-0.00135216
45	11	beta-actin	0.0456779	-0.00164105
45	12	beta-actin	0.0483892	-0.000532728
45	13	beta-actin	0.0527296	0.00220459
45	14	beta-actin	0.0599891	0.00786105
45	15	beta-actin	0.0730157	0.0192847
45	16	beta-actin	0.09599	0.0406559
45	17	beta-actin	0.138742	0.0818051
45	18	beta-actin	0.215903	0.157363
45	19	beta-actin	0.345143	0.285
45	20	beta-actin	0.539628	0.477882
45	21	beta-actin	0.785275	0.721926
45	22	beta-actin	1.03735	0.972402
45	23	beta-actin	1.24532	1.17877
45	24	beta-actin	1.38713	1.31897
45	25	beta-actin	1.47337	1.40361
45	26	beta-actin	1.52473	1.45336
45	27	beta-actin	1.55284	1.47987
45	28	beta-actin	1.57017	1.4956
45	29	beta-actin	1.58043	1.50426
45	30	beta-actin	1.58897	1.51119
45	31	beta-actin	1.59709	1.51771
45	32	beta-actin	1.6017	1.52072
45	33	beta-actin	1.60696	1.52438
45	34	beta-actin	1.61326	1.52907
45	35	beta-actin	1.61435	1.52856
45	36	beta-actin	1.61324	1.52584
45	37	beta-actin	1.61048	1.52148
45	38	beta-actin	1.6075	1.5169
45	39	beta-actin	1.60606	1.51385
45	40	beta-actin	1.60362	1.50981
46	1	beta-actin	0.0492027	0.00183454
46	2	beta-actin	0.0494911	0.000913538
46	3	beta-actin	0.0504619	0.000674989
46	4	beta-actin	0.05173	0.000733682
46	5	beta-actin	0.0523349	0.000129205
46	6	beta-actin	0.053119	-0.000296182
46	7	beta-actin	0.0539421	-0.00068248
46	8	beta-actin	0.0548225	-0.00101143
46	9	beta-actin	0.0560995	-0.000943894
46	10	beta-actin	0.0578903	-0.000362466
46	11	beta-actin	0.0594052	-5.69692e-05
46	12	beta-actin	0.0624871	0.00181554
46	13	beta-actin	0.0682558	0.0063748
46	14	beta-actin	0.0786431	0.0155527
46	15	beta-actin	0.0973108	0.033011
46	16	beta-actin	0.131227	0.0657182
46	17	beta-actin	0.193236	0.126517
46	18	beta-actin	0.298672	0.230744
46	19	beta-actin	0.46625	0.397112
46	20	beta-actin	0.694755	0.624408
46	21	beta-actin	0.949272	0.877716
46	22	beta-actin	1.17932	1.10655
46	23	beta-actin	1.34922	1.27524
46	24	beta-actin	1.45788	1.3827
46	25	beta-actin	1.5208	1.4444
46	26	beta-actin	1.55612	1.47851
46	27	beta-actin	1.57555	1.49674
46	28	beta-actin	1.58909	1.50907
46	29	beta-actin	1.59846	1.51723
46	30	beta-actin	1.60674	1.5243
46	31	beta-actin	1.61278	1.52913
46	32	beta-actin	1.61893	1.53407
46	33	beta-actin	1.62312	1.53705
46	34	beta-actin	1.62389	1.53661
46	35	beta-actin	1.62489	1.5364
46	36	beta-actin	1.62294	1.53324
46	37	beta-actin	1.62167	1.53076
46	38	beta-actin	1.61875	1.52663
46	39	beta-actin	1.6167	1.52337
46	40	beta-actin	1.61472	1.52019
47	1	beta-actin	0.0371771	0.00118844
47	2	beta-actin	0.0375333	0.00120589
47	3	beta-actin	0.0379858	0.00131961
47	4	beta-actin	0.0380355	0.00103059
47	5	beta-actin	0.0381613	0.000817577
47	6	beta-actin	0.0380377	0.000355276
47	7	beta-actin	0.0374723	-0.000548874
47	8	beta-actin	0.037337	-0.00102303
47	9	beta-actin	0.037572	-0.00112676
47	10	beta-actin	0.0377088	-0.00132872
47	11	beta-actin	0.0376512	-0.00172503
47	12	beta-actin	0.0378584	-0.00185663
47	13	beta-actin	0.039174	-0.000879821
47	14	beta-actin	0.0410334	0.000640872
47	15	beta-actin	0.0450562	0.00432492
47	16	beta-actin	0.0511157	0.0100456
47	17	beta-actin	0.0626846	0.0212757
47	18	beta-actin	0.0850049	0.0432573
47	19	beta-actin	0.125226	0.0831393
47	20	beta-actin	0.196964	0.154539
47	21	beta-actin	0.32024	0.277477
47	22	beta-actin	0.510017	0.466915
47	23	beta-actin	0.765242	0.721801
47	24	beta-actin	1.04414	1.00036
47	25	beta-actin	1.28731	1.24319
47	26	beta-actin	1.4613	1.41684
47	27	beta-actin	1.56782	1.52302
47	28	beta-actin	1.62647	1.58134
47	29	beta-actin	1.6562	1.61072
47	30	beta-actin	1.67127	1.62545
47	31	beta-actin	1.67909	1.63294
47	32	beta-actin	1.68547	1.63898
47	33	beta-actin	1.6897	1.64287
47	34	beta-actin	1.69485	1.64768
47	35	beta-actin	1.69591	1.64841
47	36	beta-actin	1.69464	1.6468
47	37	beta-actin	1.69166	1.64347
47	38	beta-actin	1.68764	1.63912
47	39	beta-actin	1.68583	1.63697
47	40	beta-actin	1.68324	1.63404
48	1	beta-actin	-0.00719927	0.00164761
48	2	beta-actin	-0.00724393	0.00121087
48	3	beta-actin	-0.00721185	0.000850863
48	4	beta-actin	-0.00694241	0.000728226
48	5	beta-actin	-0.00687009	0.000408459
48	6	beta-actin	-0.00703639	-0.000149926
48	7	beta-actin	-0.00700874	-0.000514359
48	8	beta-actin	-0.0065912	-0.000488901
48	9	beta-actin	-0.00633792	-0.000627711
48	10	beta-actin	-0.00593595	-0.000617819
48	11	beta-actin	-0.00582688	-0.00090083
48	12	beta-actin	-0.00538928	-0.000855318
48	13	beta-actin	-0.00460151	-0.000459627
48	14	beta-actin	-0.00322483	0.00052496
48	15	beta-actin	-0.00125573	0.00210198
48	16	beta-actin	0.00283885	0.00580448
48	17	beta-actin	0.0105908	0.0131643
48	18	beta-actin	0.0250671	0.0272486
48	19	beta-actin	0.051077	0.0528664
48	20	beta-actin	0.0991816	0.100579
48	21	beta-actin	0.184071	0.185076
48	22	beta-actin	0.323089	0.323702
48	23	beta-actin	0.5268	0.527021
48	24	beta-actin	0.781997	0.781826
48	25	beta-actin	1.04032	1.03976
48	26	beta-actin	1.25123	1.25028
48	27	beta-actin	1.39207	1.39072
48	28	beta-actin	1.47474	1.473
48	29	beta-actin	1.51511	1.51298
48	30	beta-actin	1.53426	1.53174
48	31	beta-actin	1.54328	1.54037
48	32	beta-actin	1.55102	1.54772
48	33	beta-actin	1.5588	1.5551
48	34	beta-actin	1.56525	1.56116
48	35	beta-actin	1.56813	1.56365
48	36	beta-actin	1.56823	1.56335
48	37	beta-actin	1.56587	1.5606
48	38	beta-actin	1.56392	1.55826
48	39	beta-actin	1.56084	1.55479
48	40	beta-actin	1.55835	1.5519
49	1	beta-actin	0.0633812	-0.000550045
49	2	beta-actin	0.0657643	-0.000392443
49	3	beta-actin	0.0691572	0.000774967
49	4	beta-actin	0.0708292	0.000221388
49	5	beta-actin	0.0728367	3.38443e-06
49	6	beta-actin	0.0746602	-0.000398656
49	7	beta-actin	0.0764944	-0.00079005
49	8	beta-actin	0.0783347	-0.0011752
49	9	beta-actin	0.0812806	-0.000454841
49	10	beta-actin	0.08578	0.00181901
49	11	beta-actin	0.0929762	0.00678966
49	12	beta-actin	0.105631	0.0172191
49	13	beta-actin	0.128603	0.0379657
49	14	beta-actin	0.170372	0.0775084
49	15	beta-actin	0.243419	0.14833
49	16	beta-actin	0.36648	0.269166
49	17	beta-actin	0.552533	0.452994
49	18	beta-actin	0.793669	0.691903
49	19	beta-actin	1.05225	0.948257
49	20	beta-actin	1.27406	1.16784
49	21	beta-actin	1.43166	1.32321
49	22	beta-actin	1.52891	1.41824
49	23	beta-actin	1.58469	1.4718
49	24	beta-actin	1.61503	1.49991
49	25	beta-actin	1.63381	1.51646
49	26	beta-actin	1.64657	1.527
49	27	beta-actin	1.65533	1.53353
49	28	beta-actin	1.66235	1.53833
49	29	beta-actin	1.66715	1.5409
49	30	beta-actin	1.67152	1.54305
49	31	beta-actin	1.67494	1.54425
49	32	beta-actin	1.67773	1.54481
49	33	beta-actin	1.6802	1.54505
49	34	beta-actin	1.68034	1.54297
49	35	beta-actin	1.67866	1.53906
49	36	beta-actin	1.67645	1.53463
49	37	beta-actin	1.67523	1.53118
49	38	beta-actin	1.67349	1.52722
49	39	beta-actin	1.67234	1.52384
49	40	beta-actin	1.67137	1.52064
50	1	beta-actin	0.00307248	0.00174244
50	2	beta-actin	0.00354254	0.00139506
50	3	beta-actin	0.00392275	0.000957838
50	4	beta-actin	0.00411487	0.000332519
[truncated: 1,876 more rows]

## Sheet: Results
Block Type	96-Well Block (0.2mL)
Calibration Background is expired	No
Calibration Background performed on	2016-02-19 13:04:02 PM CST
Calibration FAM is expired	No
Calibration FAM performed on	2016-02-19 13:49:08 PM CST
Calibration NED is expired	No
Calibration NED performed on	2016-02-19 13:11:46 PM CST
Calibration ROI is expired	No
Calibration ROI performed on	2016-02-19 12:42:23 PM CST
Calibration ROX is expired	No
Calibration ROX performed on	2016-02-19 13:41:49 PM CST
Calibration SYBR is expired	No
Calibration SYBR performed on	2016-02-19 13:26:29 PM CST
Calibration TAMRA is expired	No
Calibration TAMRA performed on	2016-02-19 13:33:48 PM CST
Calibration Uniformity is expired	No
Calibration Uniformity performed on	2016-02-19 12:57:16 PM CST
Calibration VIC is expired	No
Calibration VIC performed on	2016-02-19 13:19:06 PM CST
Chemistry	SYBR_GREEN
Experiment Barcode
Experiment Comments
Experiment File Name	E:\科研\论文\CRYAA(EMSA)——J Ophthal\BMC\补实验\qRT-PCR实验\2016-04-29 121033LIUXIN.eds
Experiment Name	2016-04-29 121033LIUXIN
Experiment Run Start Time	2016-04-29 12:47:41 PM CST
Experiment Run Stop Time	2016-04-29 14:36:08 PM CST
Experiment Type	Comparative Cт (ΔΔCт)
Experiment User Name
Instrument Name	278881388
Instrument Serial Number	278881388
Instrument Type	ViiA(TM) 7 System
Passive Reference	ROX
Quantification Cycle Method	Ct
Signal Smoothing On	true
Stage/ Cycle where Analysis is performed	Stage 2, Step 2
Well	Well Position	Omit	Sample Name	Target Name	Task	Reporter	Quencher	Quantity	Quantity Mean	Quantity SD	RQ	RQ Min	RQ Max	CT	Ct Mean	Ct SD	Delta Ct	Delta Ct Mean	Delta Ct SE	Delta Delta Ct	Automatic Ct Threshold	Ct Threshold	Automatic Baseline	Baseline Start	Baseline End	Comments	Custom1	Custom2	Custom3	Custom4	Custom5	Custom6	Tm1	Tm2	Tm3	MTP	EXPFAIL	HIGHSD	NOAMP	THOLDFAIL
1	A1	FALSE	7	CRYAA	UNKNOWN	SYBR	None							33.1175	34.6658	2.54284					TRUE	0.04	TRUE	1	40								76.0688			N	N	Y	N	Y
2	A2	FALSE	10	CRYAA	UNKNOWN	SYBR	None							34.0833	34.0587	0.0377844					TRUE	0.04	TRUE	1	40								75.9706			N	N	N	N	Y
3	A3	FALSE	6	CRYAA	UNKNOWN	SYBR	None							33.283	33.8654	0.943747					TRUE	0.04	TRUE	1	40								88.2463			N	N	Y	N	Y
4	A4	FALSE	2	CRYAA	UNKNOWN	SYBR	None							35.7807	35.7254	0.552695					TRUE	0.04	TRUE	1	40								74.7921			N	N	Y	N	Y
5	A5	FALSE	4	CRYAA	UNKNOWN	SYBR	None							33.9116	34.2827	2.16864					TRUE	0.04	TRUE	1	40								75.9706	79.997		Y	N	Y	N	Y
6	A6	FALSE	3	CRYAA	UNKNOWN	SYBR	None							31.9474	34.125	1.95343					TRUE	0.04	TRUE	1	40								76.2652	88.5409		Y	N	Y	N	Y
7	A7	FALSE	1	CRYAA	UNKNOWN	SYBR	None							33.231	33.8882	2.0183					TRUE	0.04	TRUE	1	40								88.4427			N	N	Y	N	Y
8	A8	FALSE	15	CRYAA	UNKNOWN	SYBR	None							31.6034	34.0807	3.50343					TRUE	0.04	TRUE	1	40								75.6759	88.4427		Y	N	Y	N	Y
9	A9	FALSE	9	CRYAA	UNKNOWN	SYBR	None							34.9656	35.4707	2.0978					TRUE	0.04	TRUE	1	40								76.5598			N	N	Y	N	Y
10	A10	FALSE	8	CRYAA	UNKNOWN	SYBR	None							36.1488	36.0723	0.108206					TRUE	0.04	TRUE	1	40								75.9706			N	N	N	N	Y
11	A11	FALSE	12	CRYAA	UNKNOWN	SYBR	None							36.2229	34.4431	2.51704					TRUE	0.04	TRUE	1	40								76.0688			N	N	Y	N	Y
12	A12	FALSE	11	CRYAA	UNKNOWN	SYBR	None							32.8859	35.5523	3.10856					TRUE	0.04	TRUE	1	40								87.9517	75.0867		Y	N	Y	N	Y
13	B1	FALSE	7	CRYAA	UNKNOWN	SYBR	None							33.2793	34.6658	2.54284					TRUE	0.04	TRUE	1	40								88.1481			N	N	Y	N	Y
14	B2	FALSE	10	CRYAA	UNKNOWN	SYBR	None							34.0152	34.0587	0.0377844					TRUE	0.04	TRUE	1	40								76.2652			N	N	N	N	Y
15	B3	FALSE	6	CRYAA	UNKNOWN	SYBR	None							33.3589	33.8654	0.943747					TRUE	0.04	TRUE	1	40								88.2463			N	N	Y	N	Y
16	B4	FALSE	2	CRYAA	UNKNOWN	SYBR	None							36.2484	35.7254	0.552695					TRUE	0.04	TRUE	1	40								76.0688			N	N	Y	N	Y
17	B5	FALSE	4	CRYAA	UNKNOWN	SYBR	None							32.3235	34.2827	2.16864					TRUE	0.04	TRUE	1	40								76.4616			N	N	Y	N	Y
18	B6	FALSE	3	CRYAA	UNKNOWN	SYBR	None							34.7046	34.125	1.95343					TRUE	0.04	TRUE	1	40								88.4427	78.7203		Y	N	Y	N	Y
19	B7	FALSE	1	CRYAA	UNKNOWN	SYBR	None							36.1532	33.8882	2.0183					TRUE	0.04	TRUE	1	40								74.3993	81.8629		Y	N	Y	N	Y
20	B8	FALSE	15	CRYAA	UNKNOWN	SYBR	None							Undetermined	34.0807	3.50343					TRUE	0.04	TRUE	1	40								93.1566	73.0244	80.7826	Y	Y	N	Y	Y
21	B9	FALSE	9	CRYAA	UNKNOWN	SYBR	None							33.6716	35.4707	2.0978					TRUE	0.04	TRUE	1	40								88.2463			N	N	Y	N	Y
22	B10	FALSE	8	CRYAA	UNKNOWN	SYBR	None							Undetermined	36.0723	0.108206					TRUE	0.04	TRUE	1	40								85.1037	82.7468	80.5862	Y	Y	N	Y	Y
23	B11	FALSE	12	CRYAA	UNKNOWN	SYBR	None							Undetermined	34.4431	2.51704					TRUE	0.04	TRUE	1	40								76.3634			N	N	N	N	Y
24	B12	FALSE	11	CRYAA	UNKNOWN	SYBR	None							34.8045	35.5523	3.10856					TRUE	0.04	TRUE	1	40								74.2028	80.1934		Y	N	Y	N	Y
25	C1	FALSE	7	CRYAA	UNKNOWN	SYBR	None							37.6005	34.6658	2.54284					TRUE	0.04	TRUE	1	40								82.845	85.0055		Y	N	Y	N	Y
26	C2	FALSE	10	CRYAA	UNKNOWN	SYBR	None							34.0776	34.0587	0.0377844					TRUE	0.04	TRUE	1	40								76.7562	67.7213		Y	N	N	N	Y
27	C3	FALSE	6	CRYAA	UNKNOWN	SYBR	None							34.9542	33.8654	0.943747					TRUE	0.04	TRUE	1	40								74.4975			N	N	Y	N	Y
28	C4	FALSE	2	CRYAA	UNKNOWN	SYBR	None							35.1472	35.7254	0.552695					TRUE	0.04	TRUE	1	40								76.2652			N	N	Y	N	Y
29	C5	FALSE	4	CRYAA	UNKNOWN	SYBR	None							36.6129	34.2827	2.16864					TRUE	0.04	TRUE	1	40								76.167			N	N	Y	N	Y
30	C6	FALSE	3	CRYAA	UNKNOWN	SYBR	None							35.7231	34.125	1.95343					TRUE	0.04	TRUE	1	40								75.9706			N	N	Y	N	Y
31	C7	FALSE	1	CRYAA	UNKNOWN	SYBR	None							32.2804	33.8882	2.0183					TRUE	0.04	TRUE	1	40								76.2652	88.9337	83.5324	Y	N	Y	N	Y
32	C8	FALSE	15	CRYAA	UNKNOWN	SYBR	None							36.558	34.0807	3.50343					TRUE	0.04	TRUE	1	40								76.167			N	N	Y	N	Y
33	C9	FALSE	9	CRYAA	UNKNOWN	SYBR	None							37.775	35.4707	2.0978					TRUE	0.04	TRUE	1	40								74.9885			N	N	Y	N	Y
34	C10	FALSE	8	CRYAA	UNKNOWN	SYBR	None							35.9957	36.0723	0.108206					TRUE	0.04	TRUE	1	40								74.3993			N	N	N	N	Y
35	C11	FALSE	12	CRYAA	UNKNOWN	SYBR	None							32.6633	34.4431	2.51704					TRUE	0.04	TRUE	1	40								76.4616			N	N	Y	N	Y
36	C12	FALSE	11	CRYAA	UNKNOWN	SYBR	None							38.9666	35.5523	3.10856					TRUE	0.04	TRUE	1	40								74.9885			N	N	Y	N	Y
37	D1	FALSE	7	beta-actin	UNKNOWN	SYBR	None				1	0.0392188	25.498	15.2293	15.2405	0.0157562		-19.4253	1.46815	0	TRUE	0.176609	TRUE	1	40								88.3445			N	N	N	N	N
38	D2	FALSE	10	beta-actin	UNKNOWN	SYBR	None				0.161938	0.147455	0.177844	17.2963	17.2599	0.0515378		-16.7988	0.0424731	2.62648	TRUE	0.176609	TRUE	1	40								88.4427			N	N	N	N	N
39	D3	FALSE	6	beta-actin	UNKNOWN	SYBR	None				0.13144	0.0394109	0.438367	17.4032	17.3676	0.0504346		-16.4978	0.546038	2.92752	TRUE	0.176609	TRUE	1	40								88.4427			N	N	N	N	N
40	D4	FALSE	2	beta-actin	UNKNOWN	SYBR	None				1.41963	0.69925	2.88218	15.8297	15.7946	0.0496382		-19.9308	0.321023	-0.50552	TRUE	0.176609	TRUE	1	40								88.2463			N	N	N	N	N
41	D5	FALSE	4	beta-actin	UNKNOWN	SYBR	None				0.237428	0.014926	3.77677	17.0058	16.9318	0.104708		-17.3509	1.25425	2.07444	TRUE	0.176609	TRUE	1	40								88.1481			N	N	N	N	N
42	D6	FALSE	3	beta-actin	UNKNOWN	SYBR	None				0.336614	0.0279465	4.0545	16.2992	16.2705	0.040523		-17.8545	1.12817	1.57083	TRUE	0.176609	TRUE	1	40								88.3445			N	N	N	N	N
43	D7	FALSE	1	beta-actin	UNKNOWN	SYBR	None				0.191678	0.0146632	2.50562	16.8492	16.8461	0.00429021		-17.0421	1.16527	2.38324	TRUE	0.176609	TRUE	1	40								88.3445			N	N	N	N	N
44	D8	FALSE	15	beta-actin	UNKNOWN	SYBR	None				0.0372383	1.577e-05	87.9327	20.2058	19.4024	1.1361		-14.6782	2.6043	4.74707	TRUE	0.176609	TRUE	1	40								88.6391			N	N	Y	N	N
45	D9	FALSE	9	beta-actin	UNKNOWN	SYBR	None				0.229685	0.0158749	3.3232	18.1508	18.1677	0.0239718		-17.303	1.21128	2.12227	TRUE	0.176609	TRUE	1	40								88.6391			N	N	N	N	N
46	D10	FALSE	8	beta-actin	UNKNOWN	SYBR	None				0.540143	0.429226	0.679722	17.5263	17.5355	0.0130702		-18.5367	0.0770694	0.888587	TRUE	0.176609	TRUE	1	40								88.4427			N	N	N	N	N
47	D11	FALSE	12	beta-actin	UNKNOWN	SYBR	None				0.0275561	0.000136443	5.56522	20.1975	20.1993	0.00262457		-14.2438	1.77981	5.18149	TRUE	0.176609	TRUE	1	40								88.0499			N	N	N	N	N
48	D12	FALSE	11	beta-actin	UNKNOWN	SYBR	None				0.0351039	0.000669018	1.84193	20.9139	20.9593	0.0641414		-14.5931	1.7953	4.83223	TRUE	0.176609	TRUE	1	40								87.8535			N	N	N	N	N
49	E1	FALSE	7	beta-actin	UNKNOWN	SYBR	None				1	0.0392188	25.498	15.2516	15.2405	0.0157562		-19.4253	1.46815	0	TRUE	0.176609	TRUE	1	40								88.3445			N	N	N	N	N
50	E2	FALSE	10	beta-actin	UNKNOWN	SYBR	None				0.161938	0.147455	0.177844	17.2234	17.2599	0.0515378		-16.7988	0.0424731	2.62648	TRUE	0.176609	TRUE	1	40								88.3445			N	N	N	N	N
51	E3	FALSE	6	beta-actin	UNKNOWN	SYBR	None				0.13144	0.0394109	0.438367	17.3319	17.3676	0.0504346		-16.4978	0.546038	2.92752	TRUE	0.176609	TRUE	1	40								88.4427			N	N	N	N	N
52	E4	FALSE	2	beta-actin	UNKNOWN	SYBR	None				1.41963	0.69925	2.88218	15.7595	15.7946	0.0496382		-19.9308	0.321023	-0.50552	TRUE	0.176609	TRUE	1	40								88.2463			N	N	N	N	N
53	E5	FALSE	4	beta-actin	UNKNOWN	SYBR	None				0.237428	0.014926	3.77677	16.8578	16.9318	0.104708		-17.3509	1.25425	2.07444	TRUE	0.176609	TRUE	1	40								88.1481			N	N	N	N	N
54	E6	FALSE	3	beta-actin	UNKNOWN	SYBR	None				0.336614	0.0279465	4.0545	16.2419	16.2705	0.040523		-17.8545	1.12817	1.57083	TRUE	0.176609	TRUE	1	40								88.3445			N	N	N	N	N
55	E7	FALSE	1	beta-actin	UNKNOWN	SYBR	None				0.191678	0.0146632	2.50562	16.8431	16.8461	0.00429021		-17.0421	1.16527	2.38324	TRUE	0.176609	TRUE	1	40								88.3445			N	N	N	N	N
56	E8	FALSE	15	beta-actin	UNKNOWN	SYBR	None				0.0372383	1.577e-05	87.9327	18.5991	19.4024	1.1361		-14.6782	2.6043	4.74707	TRUE	0.176609	TRUE	1	40								88.6391			N	N	Y	N	N
57	E9	FALSE	9	beta-actin	UNKNOWN	SYBR	None				0.229685	0.0158749	3.3232	18.1847	18.1677	0.0239718		-17.303	1.21128	2.12227	TRUE	0.176609	TRUE	1	40								88.6391			N	N	N	N	N
58	E10	FALSE	8	beta-actin	UNKNOWN	SYBR	None				0.540143	0.429226	0.679722	17.5448	17.5355	0.0130702		-18.5367	0.0770694	0.888587	TRUE	0.176609	TRUE	1	40								88.4427			N	N	N	N	N
59	E11	FALSE	12	beta-actin	UNKNOWN	SYBR	None				0.0275561	0.000136443	5.56522	20.2012	20.1993	0.00262457		-14.2438	1.77981	5.18149	TRUE	0.176609	TRUE	1	40								88.0499			N	N	N	N	N
60	E12	FALSE	11	beta-actin	UNKNOWN	SYBR	None				0.0351039	0.000669018	1.84193	21.0046	20.9593	0.0641414		-14.5931	1.7953	4.83223	TRUE	0.176609	TRUE	1	40								87.7553			N	N	N	N	N
61	F1	FALSE	13	CRYAA	UNKNOWN	SYBR	None							31.7752	33.8668	1.81337					TRUE	0.04	TRUE	1	40								88.2463			N	N	Y	N	Y
62	F2	FALSE	14	CRYAA	UNKNOWN	SYBR	None							Undetermined	33.5012	2.99297					TRUE	0.04	TRUE	1	40								84.7109	79.997		Y	Y	N	Y	Y
63	F3	FALSE	5	CRYAA	UNKNOWN	SYBR	None							33.1188	33.6422	0.74025					TRUE	0.04	TRUE	1	40								88.3445	74.9885		Y	N	Y	N	Y
64	F4	FALSE	16	CRYAA	UNKNOWN	SYBR	None							32.3497	32.1243	0.302691					TRUE	0.04	TRUE	1	40								76.658			N	N	N	N	Y
65	F5	FALSE	17	CRYAA	UNKNOWN	SYBR	None							Undetermined	35.0165	0.346508					TRUE	0.04	TRUE	1	40								61.2397			N	Y	N	Y	Y
66	F6	FALSE	18	CRYAA	UNKNOWN	SYBR	None							32.8324	34.3107	2.09063					TRUE	0.04	TRUE	1	40								76.2652			N	N	Y	N	Y
67	F7	FALSE	13	beta-actin	UNKNOWN	SYBR	None				0.237592	0.0316412	1.78407	16.4699	16.5149	0.0640561		-17.3519	1.0476	2.07344	TRUE	0.176609	TRUE	1	40								88.0499			N	N	N	N	N
68	F8	FALSE	14	beta-actin	UNKNOWN	SYBR	None				0.177911	0.00166998	18.9537	16.5575	16.5667	0.00805848		-16.9345	2.11635	2.49077	TRUE	0.176609	TRUE	1	40								88.6391			N	N	N	N	N
69	F9	FALSE	5	beta-actin	UNKNOWN	SYBR	None				0.113646	0.0355189	0.363624	17.2458	17.3543	0.109421		-16.2879	0.527234	3.13738	TRUE	0.176609	TRUE	1	40								88.4427			N	N	N	N	N
70	F10	FALSE	16	beta-actin	UNKNOWN	SYBR	None				0.0182798	0.0118715	0.0281476	18.7457	18.4726	0.243536		-13.6517	0.2243	5.7736	TRUE	0.176609	TRUE	1	40								88.4427			N	N	N	N	N
71	F11	FALSE	17	beta-actin	UNKNOWN	SYBR	None				0.00872969	0.00503252	0.015143	22.3417	22.431	0.0833364		-12.5854	0.249697	6.83985	TRUE	0.176609	TRUE	1	40								88.0499			N	N	N	N	N
72	F12	FALSE	18	beta-actin	UNKNOWN	SYBR	None				0.00508019	0.000194567	0.132645	22.4656	22.5063	0.073452		-11.8044	1.47891	7.6209	TRUE	0.176609	TRUE	1	40								87.8535			N	N	N	N	N
73	G1	FALSE	13	CRYAA	UNKNOWN	SYBR	None							34.8273	33.8668	1.81337					TRUE	0.04	TRUE	1	40								76.9526			N	N	Y	N	Y
74	G2	FALSE	14	CRYAA	UNKNOWN	SYBR	None							35.6175	33.5012	2.99297					TRUE	0.04	TRUE	1	40								76.5598			N	N	Y	N	Y
75	G3	FALSE	5	CRYAA	UNKNOWN	SYBR	None							34.1656	33.6422	0.74025					TRUE	0.04	TRUE	1	40								77.6401			N	N	Y	N	Y
76	G4	FALSE	16	CRYAA	UNKNOWN	SYBR	None							32.243	32.1243	0.302691					TRUE	0.04	TRUE	1	40								88.2463			N	N	N	N	Y
77	G5	FALSE	17	CRYAA	UNKNOWN	SYBR	None							35.2615	35.0165	0.346508					TRUE	0.04	TRUE	1	40								76.167			N	N	N	N	Y
78	G6	FALSE	18	CRYAA	UNKNOWN	SYBR	None							Undetermined	34.3107	2.09063					TRUE	0.04	TRUE	1	40								65.4625			N	Y	N	Y	Y
79	G7	FALSE	13	beta-actin	UNKNOWN	SYBR	None				0.237592	0.0316412	1.78407	16.4865	16.5149	0.0640561		-17.3519	1.0476	2.07344	TRUE	0.176609	TRUE	1	40								88.1481			N	N	N	N	N
80	G8	FALSE	14	beta-actin	UNKNOWN	SYBR	None				0.177911	0.00166998	18.9537	16.57	16.5667	0.00805848		-16.9345	2.11635	2.49077	TRUE	0.176609	TRUE	1	40								88.5409			N	N	N	N	N
81	G9	FALSE	5	beta-actin	UNKNOWN	SYBR	None				0.113646	0.0355189	0.363624	17.3524	17.3543	0.109421		-16.2879	0.527234	3.13738	TRUE	0.176609	TRUE	1	40								88.4427			N	N	N	N	N
82	G10	FALSE	16	beta-actin	UNKNOWN	SYBR	None				0.0182798	0.0118715	0.0281476	18.394	18.4726	0.243536		-13.6517	0.2243	5.7736	TRUE	0.176609	TRUE	1	40								88.4427			N	N	N	N	N
83	G11	FALSE	17	beta-actin	UNKNOWN	SYBR	None				0.00872969	0.00503252	0.015143	22.5068	22.431	0.0833364		-12.5854	0.249697	6.83985	TRUE	0.176609	TRUE	1	40								87.9517			N	N	N	N	N
84	G12	FALSE	18	beta-actin	UNKNOWN	SYBR	None				0.00508019	0.000194567	0.132645	22.4622	22.5063	0.073452		-11.8044	1.47891	7.6209	TRUE	0.176609	TRUE	1	40								87.8535			N	N	N	N	N
85	H1	FALSE	13	CRYAA	UNKNOWN	SYBR	None							34.9978	33.8668	1.81337					TRUE	0.04	TRUE	1	40								76.2652	84.9073		Y	N	Y	N	Y
86	H2	FALSE	14	CRYAA	UNKNOWN	SYBR	None							31.3848	33.5012	2.99297					TRUE	0.04	TRUE	1	40								88.1481	76.3634		Y	N	Y	N	Y
87	H3	FALSE	5	CRYAA	UNKNOWN	SYBR	None							Undetermined	33.6422	0.74025					TRUE	0.04	TRUE	1	40								63.2038			N	Y	N	Y	Y
88	H4	FALSE	16	CRYAA	UNKNOWN	SYBR	None							31.7803	32.1243	0.302691					TRUE	0.04	TRUE	1	40								88.1481	74.1046		Y	N	N	N	Y
89	H5	FALSE	17	CRYAA	UNKNOWN	SYBR	None							34.7715	35.0165	0.346508					TRUE	0.04	TRUE	1	40								76.0688			N	N	N	N	Y
90	H6	FALSE	18	CRYAA	UNKNOWN	SYBR	None							35.789	34.3107	2.09063					TRUE	0.04	TRUE	1	40								74.4975			N	N	Y	N	Y
91	H7	FALSE	13	beta-actin	UNKNOWN	SYBR	None				0.237592	0.0316412	1.78407	16.5882	16.5149	0.0640561		-17.3519	1.0476	2.07344	TRUE	0.176609	TRUE	1	40								88.1481			N	N	N	N	N
92	H8	FALSE	14	beta-actin	UNKNOWN	SYBR	None				0.177911	0.00166998	18.9537	16.5725	16.5667	0.00805848		-16.9345	2.11635	2.49077	TRUE	0.176609	TRUE	1	40								88.6391			N	N	N	N	N
93	H9	FALSE	5	beta-actin	UNKNOWN	SYBR	None				0.113646	0.0355189	0.363624	17.4646	17.3543	0.109421		-16.2879	0.527234	3.13738	TRUE	0.176609	TRUE	1	40								88.3445			N	N	N	N	N
94	H10	FALSE	16	beta-actin	UNKNOWN	SYBR	None				0.0182798	0.0118715	0.0281476	18.2781	18.4726	0.243536		-13.6517	0.2243	5.7736	TRUE	0.176609	TRUE	1	40								88.4427			N	N	N	N	N
95	H11	FALSE	17	beta-actin	UNKNOWN	SYBR	None				0.00872969	0.00503252	0.015143	22.4445	22.431	0.0833364		-12.5854	0.249697	6.83985	TRUE	0.176609	TRUE	1	40								87.9517			N	N	N	N	N
96	H12	FALSE	18	beta-actin	UNKNOWN	SYBR	None				0.00508019	0.000194567	0.132645	22.5911	22.5063	0.073452		-11.8044	1.47891	7.6209	TRUE	0.176609	TRUE	1	40								87.7553			N	N	N	N	N
Analysis Type	Singleplex
Endogenous Control	CRYAA
RQ Min/Max Confidence Level	95.0
Reference Sample	4

## Sheet: Melt Curve Raw Data
Block Type	96-Well Block (0.2mL)
Calibration Background is expired	No
Calibration Background performed on	2016-02-19 13:04:02 PM CST
Calibration FAM is expired	No
Calibration FAM performed on	2016-02-19 13:49:08 PM CST
Calibration NED is expired	No
Calibration NED performed on	2016-02-19 13:11:46 PM CST
Calibration ROI is expired	No
Calibration ROI performed on	2016-02-19 12:42:23 PM CST
Calibration ROX is expired	No
Calibration ROX performed on	2016-02-19 13:41:49 PM CST
Calibration SYBR is expired	No
Calibration SYBR performed on	2016-02-19 13:26:29 PM CST
Calibration TAMRA is expired	No
Calibration TAMRA performed on	2016-02-19 13:33:48 PM CST
Calibration Uniformity is expired	No
Calibration Uniformity performed on	2016-02-19 12:57:16 PM CST
Calibration VIC is expired	No
Calibration VIC performed on	2016-02-19 13:19:06 PM CST
Chemistry	SYBR_GREEN
Experiment Barcode
Experiment Comments
Experiment File Name	E:\科研\论文\CRYAA(EMSA)——J Ophthal\BMC\补实验\qRT-PCR实验\2016-04-29 121033LIUXIN.eds
Experiment Name	2016-04-29 121033LIUXIN
Experiment Run Start Time	2016-04-29 12:47:41 PM CST
Experiment Run Stop Time	2016-04-29 14:36:08 PM CST
Experiment Type	Comparative Cт (ΔΔCт)
Experiment User Name
Instrument Name	278881388
Instrument Serial Number	278881388
Instrument Type	ViiA(TM) 7 System
Passive Reference	ROX
Quantification Cycle Method	Ct
Signal Smoothing On	true
Stage/ Cycle where Analysis is performed	Stage 2, Step 2
Well	Well Position	Reading	Temperature	Fluorescence	Derivative
1	A1	1	60.1594	0.814174	0.0456733
1	A1	2	60.3558	0.81649	0.0438977
1	A1	3	60.5522	0.815312	0.0423634
1	A1	4	60.7486	0.813173	0.0414698
1	A1	5	60.945	0.809035	0.0413915
1	A1	6	61.1415	0.807486	0.0420455
1	A1	7	61.3379	0.803413	0.0431893
1	A1	8	61.5343	0.799426	0.0445709
1	A1	9	61.7307	0.795467	0.0460342
1	A1	10	61.9271	0.79273	0.0475321
1	A1	11	62.1235	0.789625	0.0490792
1	A1	12	62.3199	0.785464	0.0506931
1	A1	13	62.5163	0.780151	0.0523613
1	A1	14	62.7128	0.777173	0.0540418
1	A1	15	62.9092	0.773774	0.0556728
1	A1	16	63.1056	0.767831	0.0571921
1	A1	17	63.302	0.764747	0.0585638
1	A1	18	63.4984	0.758694	0.0598
1	A1	19	63.6948	0.754039	0.0609551
1	A1	20	63.8912	0.750578	0.0620987
1	A1	21	64.0876	0.745922	0.0632758
1	A1	22	64.284	0.740103	0.0644862
1	A1	23	64.4805	0.734743	0.0656999
1	A1	24	64.6769	0.730593	0.0668901
1	A1	25	64.8733	0.725559	0.0680651
1	A1	26	65.0697	0.71865	0.0692775
1	A1	27	65.2661	0.713891	0.0705981
1	A1	28	65.4625	0.709478	0.0720723
1	A1	29	65.6589	0.703994	0.0736783
1	A1	30	65.8553	0.697457	0.0753243
1	A1	31	66.0518	0.6926	0.0768859
1	A1	32	66.2482	0.684811	0.0782607
1	A1	33	66.4446	0.679392	0.0793991
1	A1	34	66.641	0.673565	0.0802983
1	A1	35	66.8374	0.667126	0.0809722
1	A1	36	67.0338	0.660432	0.0814259
1	A1	37	67.2302	0.653712	0.0816463
1	A1	38	67.4266	0.648442	0.0816079
1	A1	39	67.623	0.641102	0.0812768
1	A1	40	67.8195	0.634937	0.0806151
1	A1	41	68.0159	0.628977	0.0795811
1	A1	42	68.2123	0.622439	0.0781378
1	A1	43	68.4087	0.615686	0.0762658
1	A1	44	68.6051	0.609862	0.0739781
1	A1	45	68.8015	0.605512	0.0713423
1	A1	46	68.9979	0.598439	0.068497
1	A1	47	69.1943	0.593704	0.0656652
1	A1	48	69.3908	0.589009	0.0631294
1	A1	49	69.5872	0.584238	0.0611705
1	A1	50	69.7836	0.581378	0.0599849
1	A1	51	69.98	0.576516	0.0596245
1	A1	52	70.1764	0.572897	0.0600007
1	A1	53	70.3728	0.566549	0.0609548
1	A1	54	70.5692	0.562935	0.0623492
1	A1	55	70.7656	0.557945	0.064142
1	A1	56	70.9621	0.552695	0.0664003
1	A1	57	71.1585	0.547279	0.069263
1	A1	58	71.3549	0.542942	0.0728737
1	A1	59	71.5513	0.537609	0.0773189
1	A1	60	71.7477	0.531557	0.0826068
1	A1	61	71.9441	0.524639	0.088679
1	A1	62	72.1405	0.51736	0.0954532
1	A1	63	72.3369	0.511389	0.102856
1	A1	64	72.5333	0.502073	0.110849
1	A1	65	72.7298	0.493992	0.119426
1	A1	66	72.9262	0.48366	0.128604
1	A1	67	73.1226	0.474011	0.138388
1	A1	68	73.319	0.463577	0.148747
1	A1	69	73.5154	0.451608	0.159601
1	A1	70	73.7118	0.43764	0.17087
1	A1	71	73.9082	0.42445	0.182552
1	A1	72	74.1046	0.409206	0.194798
1	A1	73	74.301	0.393264	0.207915
1	A1	74	74.4975	0.378748	0.222293
1	A1	75	74.6939	0.360396	0.238237
1	A1	76	74.8903	0.34292	0.255784
1	A1	77	75.0867	0.323313	0.274548
1	A1	78	75.2831	0.300903	0.293656
1	A1	79	75.4795	0.27719	0.311777
1	A1	80	75.6759	0.250063	0.327252
1	A1	81	75.8723	0.223228	0.338292
1	A1	82	76.0688	0.194435	0.343209
1	A1	83	76.2652	0.162875	0.340677
1	A1	84	76.4616	0.133993	0.32998
1	A1	85	76.658	0.1052	0.311196
1	A1	86	76.8544	0.0798265	0.285272
1	A1	87	77.0508	0.0571896	0.253936
1	A1	88	77.2472	0.0395019	0.219444
1	A1	89	77.4436	0.02629	0.184221
1	A1	90	77.6401	0.0160861	0.150486
1	A1	91	77.8365	0.00836219	0.119954
1	A1	92	78.0329	0.00284279	0.0936808
1	A1	93	78.2293	-0.000839344	0.0720683
1	A1	94	78.4257	-0.00348909	0.0549788
1	A1	95	78.6221	-0.00589499	0.04192
1	A1	96	78.8185	-0.00802463	0.0322322
1	A1	97	79.0149	-0.00882665	0.0252373
1	A1	98	79.2113	-0.0104553	0.020324
1	A1	99	79.4078	-0.0110481	0.016971
1	A1	100	79.6042	-0.0123027	0.0147332
1	A1	101	79.8006	-0.0119023	0.0132266
1	A1	102	79.997	-0.0144694	0.0121359
1	A1	103	80.1934	-0.015352	0.0112397
1	A1	104	80.3898	-0.0155605	0.0104266
1	A1	105	80.5862	-0.0168949	0.00967875
1	A1	106	80.7826	-0.0165817	0.0090234
1	A1	107	80.979	-0.017484	0.00847835
1	A1	108	81.1755	-0.0184574	0.00802243
1	A1	109	81.3719	-0.0185599	0.00760292
1	A1	110	81.5683	-0.0196776	0.00716732
1	A1	111	81.7647	-0.0199017	0.00669501
1	A1	112	81.9611	-0.0210605	0.00620872
1	A1	113	82.1575	-0.020619	0.00576094
1	A1	114	82.3539	-0.021021	0.00540539
1	A1	115	82.5503	-0.0217696	0.0051697
1	A1	116	82.7468	-0.0220106	0.00504246
1	A1	117	82.9432	-0.0218567	0.00497857
1	A1	118	83.1396	-0.0228334	0.00491826
1	A1	119	83.336	-0.0231694	0.00481001
1	A1	120	83.5324	-0.0238471	0.00462721
1	A1	121	83.7288	-0.0236073	0.00437286
1	A1	122	83.9252	-0.0243076	0.00407447
1	A1	123	84.1216	-0.0242965	0.00377558
1	A1	124	84.3181	-0.025243	0.00352799
1	A1	125	84.5145	-0.0247338	0.00338288
1	A1	126	84.7109	-0.0250305	0.0033777
1	A1	127	84.9073	-0.0255444	0.00352183
1	A1	128	85.1037	-0.0250652	0.0037894
1	A1	129	85.3001	-0.0260177	0.00412578
1	A1	130	85.4965	-0.0266104	0.00446473
1	A1	131	85.6929	-0.0266496	0.00474671
1	A1	132	85.8893	-0.0266159	0.00493083
1	A1	133	86.0858	-0.0279467	0.00499936
1	A1	134	86.2822	-0.028199	0.00495708
1	A1	135	86.4786	-0.0282221	0.00482714
1	A1	136	86.675	-0.0286662	0.00464458
1	A1	137	86.8714	-0.0290504	0.00445072
1	A1	138	87.0678	-0.0292266	0.00428981
1	A1	139	87.2642	-0.0300837	0.00420415
1	A1	140	87.4606	-0.0300261	0.00422062
1	A1	141	87.6571	-0.0296301	0.00433021
1	A1	142	87.8535	-0.0304677	0.00447575
1	A1	143	88.0499	-0.0307587	0.00456476
1	A1	144	88.2463	-0.0317809	0.00450866
1	A1	145	88.4427	-0.0320945	0.00426711
1	A1	146	88.6391	-0.0322627	0.00386942
1	A1	147	88.8355	-0.0323415	0.00340059
1	A1	148	89.0319	-0.0327162	0.00296231
1	A1	149	89.2283	-0.0328175	0.00263239
1	A1	150	89.4248	-0.0327217	0.00244127
1	A1	151	89.6212	-0.0329412	0.00237159
1	A1	152	89.8176	-0.0337212	0.00237502
1	A1	153	90.014	-0.0330409	0.00239521
1	A1	154	90.2104	-0.0340921	0.00238634
1	A1	155	90.4068	-0.0337804	0.0023215
1	A1	156	90.6032	-0.0340713	0.0021933
1	A1	157	90.7996	-0.0340874	0.00201267
1	A1	158	90.9961	-0.0347342	0.00180883
1	A1	159	91.1925	-0.0347679	0.0016264
1	A1	160	91.3889	-0.033852	0.00151322
1	A1	161	91.5853	-0.0346263	0.00150056
1	A1	162	91.7817	-0.0347863	0.00158655
1	A1	163	91.9781	-0.0349253	0.00173424
1	A1	164	92.1745	-0.0347898	0.00188542
1	A1	165	92.3709	-0.0353498	0.00198163
1	A1	166	92.5674	-0.0355389	0.00198306
1	A1	167	92.7638	-0.0355172	0.0018803
1	A1	168	92.9602	-0.0360281	0.00169689
1	A1	169	93.1566	-0.0357376	0.00148057
1	A1	170	93.353	-0.035654	0.0012843
1	A1	171	93.5494	-0.035974	0.00114475
1	A1	172	93.7458	-0.0357054	0.00106913
1	A1	173	93.9422	-0.0364344	0.00103641
1	A1	174	94.1386	-0.0360304	0.00100981
1	A1	175	94.3351	-0.0360651	0.000952382
1	A1	176	94.5315	-0.0362368	0.000840219
1	A1	177	94.7279	-0.0370858	0.00067099
1	A1	178	94.9243	-0.0361616	0.000465908
2	A2	1	60.1594	0.815385	0.0582591
2	A2	2	60.3558	0.815278	0.0561944
2	A2	3	60.5522	0.81308	0.0542038
2	A2	4	60.7486	0.81051	0.0528129
2	A2	5	60.945	0.806938	0.0523554
2	A2	6	61.1415	0.80447	0.0528597
2	A2	7	61.3379	0.800383	0.0541047
2	A2	8	61.5343	0.795883	0.0557838
2	A2	9	61.7307	0.790456	0.0576586
2	A2	10	61.9271	0.788082	0.0596213
2	A2	11	62.1235	0.783003	0.0616534
2	A2	12	62.3199	0.780056	0.0637465
2	A2	13	62.5163	0.77407	0.0658604
2	A2	14	62.7128	0.768542	0.067932
2	A2	15	62.9092	0.765171	0.0699111
2	A2	16	63.1056	0.759153	0.0717742
2	A2	17	63.302	0.754122	0.073507
2	A2	18	63.4984	0.749707	0.0750833
2	A2	19	63.6948	0.742823	0.0764512
2	A2	20	63.8912	0.739043	0.0775549
2	A2	21	64.0876	0.731709	0.0783635
2	A2	22	64.284	0.726066	0.0788999
2	A2	23	64.4805	0.721155	0.0792438
2	A2	24	64.6769	0.715478	0.0795128
2	A2	25	64.8733	0.70861	0.0798321
2	A2	26	65.0697	0.704546	0.0803072
2	A2	27	65.2661	0.698279	0.0809982
2	A2	28	65.4625	0.692417	0.0819054
2	A2	29	65.6589	0.686703	0.0829633
2	A2	30	65.8553	0.681743	0.084055
2	A2	31	66.0518	0.674438	0.0850521
2	A2	32	66.2482	0.668991	0.0858767
2	A2	33	66.4446	0.661895	0.0865455
2	A2	34	66.641	0.655381	0.0871771
2	A2	35	66.8374	0.650142	0.0879418
2	A2	36	67.0338	0.643997	0.088974
2	A2	37	67.2302	0.637582	0.0903009
2	A2	38	67.4266	0.631156	0.0918098
2	A2	39	67.623	0.624833	0.0932786
2	A2	40	67.8195	0.617699	0.0944451
2	A2	41	68.0159	0.61055	0.0950881
2	A2	42	68.2123	0.602618	0.0950753
2	A2	43	68.4087	0.595813	0.0943742
2	A2	44	68.6051	0.589589	0.093023
2	A2	45	68.8015	0.583304	0.0911008
2	A2	46	68.9979	0.57522	0.0887211
2	A2	47	69.1943	0.5697	0.0860426
2	A2	48	69.3908	0.563668	0.083274
2	A2	49	69.5872	0.558085	0.0806553
2	A2	50	69.7836	0.552643	0.0784124
2	A2	51	69.98	0.547498	0.0767114
2	A2	52	70.1764	0.542292	0.0756367
2	A2	53	70.3728	0.53727	0.0752017
2	A2	54	70.5692	0.532253	0.0753841
2	A2	55	70.7656	0.526048	0.0761621
2	A2	56	70.9621	0.52095	0.0775395
2	A2	57	71.1585	0.516435	0.0795495
2	A2	58	71.3549	0.509946	0.0822535
2	A2	59	71.5513	0.504638	0.0857433
2	A2	60	71.7477	0.497903	0.0901438
2	A2	61	71.9441	0.491778	0.0955964
2	A2	62	72.1405	0.48543	0.102225
2	A2	63	72.3369	0.479843	0.11009
2	A2	64	72.5333	0.470012	0.119165
2	A2	65	72.7298	0.461909	0.129342
2	A2	66	72.9262	0.452464	0.140451
2	A2	67	73.1226	0.442881	0.152293
2	A2	68	73.319	0.431486	0.164665
2	A2	69	73.5154	0.41746	0.177399
2	A2	70	73.7118	0.40454	0.190405
2	A2	71	73.9082	0.391113	0.2037
2	A2	72	74.1046	0.375873	0.217417
2	A2	73	74.301	0.359077	0.231774
2	A2	74	74.4975	0.342114	0.247003
2	A2	75	74.6939	0.324784	0.263229
2	A2	76	74.8903	0.306305	0.280306
2	A2	77	75.0867	0.285664	0.297674
2	A2	78	75.2831	0.263696	0.314302
2	A2	79	75.4795	0.239436	0.32877
2	A2	80	75.6759	0.21309	0.339476
2	A2	81	75.8723	0.187027	0.344916
2	A2	82	76.0688	0.159011	0.343956
2	A2	83	76.2652	0.131861	0.336012
2	A2	84	76.4616	0.105972	0.321135
2	A2	85	76.658	0.0816344	0.299981
2	A2	86	76.8544	0.0603773	0.273713
2	A2	87	77.0508	0.0414902	0.243845
2	A2	88	77.2472	0.0245489	0.212079
2	A2	89	77.4436	0.0130843	0.180114
2	A2	90	77.6401	0.00289625	0.149481
2	A2	91	77.8365	-0.00471657	0.121402
2	A2	92	78.0329	-0.0105284	0.0967024
2	A2	93	78.2293	-0.0147241	0.0757985
2	A2	94	78.4257	-0.0173081	0.0587409
2	A2	95	78.6221	-0.0198278	0.0452936
2	A2	96	78.8185	-0.0215337	0.0350296
2	A2	97	79.0149	-0.0228225	0.0274228
2	A2	98	79.2113	-0.0239266	0.0219268
2	A2	99	79.4078	-0.0250492	0.0180309
2	A2	100	79.6042	-0.0258669	0.0152937
2	A2	101	79.8006	-0.0268955	0.0133567
2	A2	102	79.997	-0.0272698	0.0119447
2	A2	103	80.1934	-0.0286066	0.0108595
2	A2	104	80.3898	-0.0286708	0.00997143
2	A2	105	80.5862	-0.0301926	0.00920602
2	A2	106	80.7826	-0.029924	0.00852554
2	A2	107	80.979	-0.030983	0.00790878
2	A2	108	81.1755	-0.0307112	0.00733622
2	A2	109	81.3719	-0.0323962	0.00678666
2	A2	110	81.5683	-0.0320932	0.00624319
2	A2	111	81.7647	-0.0326633	0.00570079
2	A2	112	81.9611	-0.03316	0.00517007
2	A2	113	82.1575	-0.0330784	0.00467607
2	A2	114	82.3539	-0.0338189	0.00425251
2	A2	115	82.5503	-0.0343208	0.00392946
2	A2	116	82.7468	-0.0336967	0.00371516
2	A2	117	82.9432	-0.0340216	0.00358202
2	A2	118	83.1396	-0.0343203	0.00347218
2	A2	119	83.336	-0.0351651	0.00332675
2	A2	120	83.5324	-0.0353087	0.00312175
2	A2	121	83.7288	-0.0355232	0.00288276
2	A2	122	83.9252	-0.0354868	0.00266423
2	A2	123	84.1216	-0.0352399	0.00250778
2	A2	124	84.3181	-0.0356551	0.0024116
2	A2	125	84.5145	-0.0358461	0.00233336
2	A2	126	84.7109	-0.0364198	0.00222163
2	A2	127	84.9073	-0.0365287	0.00205073
2	A2	128	85.1037	-0.0363554	0.00183607
2	A2	129	85.3001	-0.0364324	0.00162624
2	A2	130	85.4965	-0.0366307	0.00148329
2	A2	131	85.6929	-0.0369822	0.00146209
2	A2	132	85.8893	-0.0366833	0.00159159
2	A2	133	86.0858	-0.0367121	0.00185923
2	A2	134	86.2822	-0.0361969	0.00220618
2	A2	135	86.4786	-0.0374372	0.00254328
2	A2	136	86.675	-0.0378238	0.00278586
2	A2	137	86.8714	-0.0375605	0.00288929
2	A2	138	87.0678	-0.0379159	0.00286299
2	A2	139	87.2642	-0.038434	0.00275479
2	A2	140	87.4606	-0.0382055	0.00261677
2	A2	141	87.6571	-0.0382699	0.00247442
2	A2	142	87.8535	-0.038605	0.00231682
2	A2	143	88.0499	-0.0388652	0.00211155
2	A2	144	88.2463	-0.0391083	0.00183396
2	A2	145	88.4427	-0.039352	0.00149232
2	A2	146	88.6391	-0.039055	0.00113308
2	A2	147	88.8355	-0.0396352	0.000822989
2	A2	148	89.0319	-0.0387543	0.000619148
2	A2	149	89.2283	-0.0393903	0.000545322
2	A2	150	89.4248	-0.0390205	0.000588374
2	A2	151	89.6212	-0.0394482	0.000714702
2	A2	152	89.8176	-0.039409	0.000893167
2	A2	153	90.014	-0.0393971	0.00110708
2	A2	154	90.2104	-0.0395654	0.0013469
2	A2	155	90.4068	-0.0393753	0.00159122
2	A2	156	90.6032	-0.0398572	0.00179418
2	A2	157	90.7996	-0.039913	0.0018942
2	A2	158	90.9961	-0.0407623	0.00184271
2	A2	159	91.1925	-0.0402584	0.00163469
2	A2	160	91.3889	-0.0406211	0.00131932
2	A2	161	91.5853	-0.040229	0.000982387
2	A2	162	91.7817	-0.0405903	0.000711475
2	A2	163	91.9781	-0.0401567	0.000564823
2	A2	164	92.1745	-0.0404312	0.000558324
2	A2	165	92.3709	-0.0407108	0.000670626
2	A2	166	92.5674	-0.0402774	0.000856289
2	A2	167	92.7638	-0.0406199	0.00105845
2	A2	168	92.9602	-0.0408017	0.00122063
2	A2	169	93.1566	-0.0408387	0.00130119
2	A2	170	93.353	-0.0415608	0.00128894
2	A2	171	93.5494	-0.040878	0.00120964
2	A2	172	93.7458	-0.0412157	0.00111387
2	A2	173	93.9422	-0.0410176	0.0010487
2	A2	174	94.1386	-0.0410243	0.00102965
2	A2	175	94.3351	-0.0417776	0.00103169
2	A2	176	94.5315	-0.0409989	0.00100561
2	A2	177	94.7279	-0.0417947	0.000908942
2	A2	178	94.9243	-0.0420702	0.000731967
3	A3	1	60.1594	0.899782	0.0208708
3	A3	2	60.3558	0.901402	0.0176922
3	A3	3	60.5522	0.901158	0.014197
3	A3	4	60.7486	0.90219	0.0112027
3	A3	5	60.945	0.902842	0.00938556
3	A3	6	61.1415	0.901665	0.00906304
3	A3	7	61.3379	0.902889	0.0101575
3	A3	8	61.5343	0.90153	0.0123307
3	A3	9	61.7307	0.899279	0.015179
3	A3	10	61.9271	0.898715	0.0183912
3	A3	11	62.1235	0.896452	0.0218106
3	A3	12	62.3199	0.895053	0.0254139
3	A3	13	62.5163	0.892069	0.0292324
3	A3	14	62.7128	0.8905	0.0332855
3	A3	15	62.9092	0.88779	0.0375429
3	A3	16	63.1056	0.882968	0.0419178
3	A3	17	63.302	0.880849	0.0462909
3	A3	18	63.4984	0.875679	0.0505247
3	A3	19	63.6948	0.870519	0.0544734
3	A3	20	63.8912	0.867241	0.0579878
3	A3	21	64.0876	0.861465	0.0609403
3	A3	22	64.284	0.854802	0.0632694
3	A3	23	64.4805	0.848878	0.0650196
3	A3	24	64.6769	0.842851	0.0663371
3	A3	25	64.8733	0.838661	0.0674173
3	A3	26	65.0697	0.832044	0.0684242
3	A3	27	65.2661	0.826982	0.0694351
3	A3	28	65.4625	0.820264	0.0704357
3	A3	29	65.6589	0.814175	0.0713607
3	A3	30	65.8553	0.808882	0.0721405
3	A3	31	66.0518	0.801028	0.0727297
3	A3	32	66.2482	0.795453	0.0731049
3	A3	33	66.4446	0.789992	0.0732511
3	A3	34	66.641	0.783446	0.0731607
3	A3	35	66.8374	0.775287	0.0728486
3	A3	36	67.0338	0.770361	0.0723684
3	A3	37	67.2302	0.764059	0.0718126
3	A3	38	67.4266	0.757587	0.0712855
3	A3	39	67.623	0.752258	0.070872
3	A3	40	67.8195	0.746354	0.0706156
3	A3	41	68.0159	0.73948	0.0705205
3	A3	42	68.2123	0.734441	0.0705662
3	A3	43	68.4087	0.727129	0.0707162
3	A3	44	68.6051	0.72222	0.0709253
3	A3	45	68.8015	0.71616	0.0711369
3	A3	46	68.9979	0.709654	0.0712923
3	A3	47	69.1943	0.702905	0.0713426
3	A3	48	69.3908	0.697419	0.071258
3	A3	49	69.5872	0.691972	0.0710346
3	A3	50	69.7836	0.68493	0.0706974
3	A3	51	69.98	0.679076	0.0703008
3	A3	52	70.1764	0.672028	0.0699118
3	A3	53	70.3728	0.668022	0.0695795
3	A3	54	70.5692	0.66207	0.069307
3	A3	55	70.7656	0.65533	0.0690518
3	A3	56	70.9621	0.649482	0.0687658
3	A3	57	71.1585	0.642526	0.068443
3	A3	58	71.3549	0.637561	0.0681342
3	A3	59	71.5513	0.631889	0.0679126
3	A3	60	71.7477	0.626881	0.0678154
3	A3	61	71.9441	0.620206	0.0678092
3	A3	62	72.1405	0.615305	0.0678044
3	A3	63	72.3369	0.608817	0.0677068
3	A3	64	72.5333	0.602339	0.067472
3	A3	65	72.7298	0.597718	0.0671264
3	A3	66	72.9262	0.591484	0.0667466
3	A3	67	73.1226	0.586197	0.0664086
3	A3	68	73.319	0.580283	0.0661476
3	A3	69	73.5154	0.575342	0.0659397
3	A3	70	73.7118	0.569469	0.0657292
3	A3	71	73.9082	0.563099	0.0654708
3	A3	72	74.1046	0.556779	0.0651618
3	A3	73	74.301	0.55249	0.064837
3	A3	74	74.4975	0.547783	0.0645366
3	A3	75	74.6939	0.541356	0.0642771
3	A3	76	74.8903	0.535573	0.0640466
3	A3	77	75.0867	0.530059	0.063823
3	A3	78	75.2831	0.526017	0.0635926
3	A3	79	75.4795	0.518849	0.0633528
3	A3	80	75.6759	0.514641	0.0631014
3	A3	81	75.8723	0.509234	0.06283
3	A3	82	76.0688	0.503375	0.0625278
3	A3	83	76.2652	0.498838	0.0621928
3	A3	84	76.4616	0.492276	0.061843
3	A3	85	76.658	0.4877	0.0615101
3	A3	86	76.8544	0.482784	0.0612257
3	A3	87	77.0508	0.47733	0.0610042
3	A3	88	77.2472	0.472231	0.0608387
3	A3	89	77.4436	0.466103	0.0607057
3	A3	90	77.6401	0.462234	0.0605748
3	A3	91	77.8365	0.456227	0.0604152
3	A3	92	78.0329	0.451456	0.0601986
3	A3	93	78.2293	0.445792	0.0599087
3	A3	94	78.4257	0.440501	0.0595499
3	A3	95	78.6221	0.436082	0.0591508
3	A3	96	78.8185	0.430441	0.0587526
3	A3	97	79.0149	0.425638	0.058387
3	A3	98	79.2113	0.421486	0.0580604
3	A3	99	79.4078	0.416387	0.0577599
3	A3	100	79.6042	0.409798	0.0574723
3	A3	101	79.8006	0.406127	0.0572035
3	A3	102	79.997	0.400899	0.0569742
3	A3	103	80.1934	0.397313	0.0567983
3	A3	104	80.3898	0.391277	0.0566638
3	A3	105	80.5862	0.386423	0.0565372
3	A3	106	80.7826	0.382561	0.0563872
3	A3	107	80.979	0.376357	0.0562077
3	A3	108	81.1755	0.372216	0.0560168
3	A3	109	81.3719	0.367852	0.055833
3	A3	110	81.5683	0.362886	0.0556521
3	A3	111	81.7647	0.358634	0.0554461
3	A3	112	81.9611	0.352146	0.0551851
3	A3	113	82.1575	0.348396	0.0548671
3	A3	114	82.3539	0.34424	0.0545278
3	A3	115	82.5503	0.339406	0.0542263
3	A3	116	82.7468	0.33488	0.0540122
3	A3	117	82.9432	0.329963	0.0538981
3	A3	118	83.1396	0.326231	0.0538481
3	A3	119	83.336	0.321484	0.0537896
3	A3	120	83.5324	0.316347	0.0536488
3	A3	121	83.7288	0.311606	0.0533901
3	A3	122	83.9252	0.306191	0.0530371
3	A3	123	84.1216	0.303332	0.0526597
3	A3	124	84.3181	0.298451	0.0523345
3	A3	125	84.5145	0.293971	0.0521064
3	A3	126	84.7109	0.289285	0.0519796
3	A3	127	84.9073	0.28497	0.0519318
3	A3	128	85.1037	0.280201	0.0519399
3	A3	129	85.3001	0.276619	0.0519965
3	A3	130	85.4965	0.271245	0.0521236
3	A3	131	85.6929	0.267021	0.0524046
3	A3	132	85.8893	0.263131	0.0530523
3	A3	133	86.0858	0.257693	0.0545319
3	A3	134	86.2822	0.253899	0.0577331
3	A3	135	86.4786	0.24968	0.0641588
3	A3	136	86.675	0.245397	0.0760355
3	A3	137	86.8714	0.240555	0.0961573
3	A3	138	87.0678	0.235683	0.127231
3	A3	139	87.2642	0.229517	0.170594
3	A3	140	87.4606	0.220431	0.224555
3	A3	141	87.6571	0.206097	0.28311
3	A3	142	87.8535	0.179419	0.336124
3	A3	143	88.0499	0.127246	0.371659
3	A3	144	88.2463	0.046229	0.379987
3	A3	145	88.4427	-0.0191061	0.357537
3	A3	146	88.6391	-0.038916	0.308622
3	A3	147	88.8355	-0.041735	0.243863
3	A3	148	89.0319	-0.0427677	0.176129
3	A3	149	89.2283	-0.0417236	0.116145
3	A3	150	89.4248	-0.042756	0.069858
3	A3	151	89.6212	-0.0427887	0.0382662
3	A3	152	89.8176	-0.0426671	0.0190328
3	A3	153	90.014	-0.0426963	0.00855088
3	A3	154	90.2104	-0.0420301	0.00346248
3	A3	155	90.4068	-0.0422871	0.00131885
3	A3	156	90.6032	-0.0422633	0.000601457
3	A3	157	90.7996	-0.0423842	0.000473558
3	A3	158	90.9961	-0.0432023	0.000521911
3	A3	159	91.1925	-0.0427081	0.000578011
3	A3	160	91.3889	-0.0425448	0.000606161
3	A3	161	91.5853	-0.0421603	0.000627703
3	A3	162	91.7817	-0.0434222	0.000670404
3	A3	163	91.9781	-0.0426745	0.00074409
3	A3	164	92.1745	-0.042935	0.000838192
3	A3	165	92.3709	-0.0427017	0.00092999
3	A3	166	92.5674	-0.0432542	0.000995489
3	A3	167	92.7638	-0.0434815	0.00102098
3	A3	168	92.9602	-0.0434598	0.00101202
3	A3	169	93.1566	-0.0433396	0.000991708
3	A3	170	93.353	-0.0431573	0.000984221
3	A3	171	93.5494	-0.0436176	0.00099347
3	A3	172	93.7458	-0.0432623	0.000995559
3	A3	173	93.9422	-0.0442864	0.000954474
3	A3	174	94.1386	-0.0441452	0.000849663
3	A3	175	94.3351	-0.0437164	0.000692447
3	A3	176	94.5315	-0.0436606	0.00051813
3	A3	177	94.7279	-0.0438829	0.00036244
3	A3	178	94.9243	-0.0441741	0.00024286
4	A4	1	60.1594	0.64478	0.0820822
4	A4	2	60.3558	0.643191	0.0803857
4	A4	3	60.5522	0.639527	0.0785023
4	A4	4	60.7486	0.635482	0.0768766
4	A4	5	60.945	0.63179	0.0759316
4	A4	6	61.1415	0.626608	0.0759281
4	A4	7	61.3379	0.62386	0.0768954
4	A4	8	61.5343	0.618853	0.0786485
4	A4	9	61.7307	0.614907	0.0808703
4	A4	10	61.9271	0.609076	0.0832322
4	A4	11	62.1235	0.603901	0.0854838
4	A4	12	62.3199	0.599207	0.0874931
4	A4	13	62.5163	0.593352	0.0892121
4	A4	14	62.7128	0.58869	0.0906185
4	A4	15	62.9092	0.584136	0.0916798
4	A4	16	63.1056	0.57727	0.0923663
4	A4	17	63.302	0.571389	0.0926944
4	A4	18	63.4984	0.566965	0.0927512
4	A4	19	63.6948	0.561669	0.092675
4	A4	20	63.8912	0.555247	0.0925907
4	A4	21	64.0876	0.551448	0.0925558
4	A4	22	64.284	0.545296	0.092539
4	A4	23	64.4805	0.539807	0.0924633
4	A4	24	64.6769	0.53459	0.0922698
4	A4	25	64.8733	0.528333	0.0919681
4	A4	26	65.0697	0.523056	0.0916315
4	A4	27	65.2661	0.518437	0.0913435
4	A4	28	65.4625	0.51361	0.0911421
4	A4	29	65.6589	0.507962	0.0910069
4	A4	30	65.8553	0.501911	0.0909008
4	A4	31	66.0518	0.497269	0.0908258
4	A4	32	66.2482	0.491422	0.0908374
4	A4	33	66.4446	0.485943	0.0910028
4	A4	34	66.641	0.482699	0.0913405
4	A4	35	66.8374	0.47626	0.0917989
4	A4	36	67.0338	0.469963	0.0922941
4	A4	37	67.2302	0.464654	0.0927714
4	A4	38	67.4266	0.459506	0.0932284
4	A4	39	67.623	0.454429	0.0936899
4	A4	40	67.8195	0.44939	0.0941556
4	A4	41	68.0159	0.442681	0.0945763
4	A4	42	68.2123	0.437286	0.0948672
4	A4	43	68.4087	0.43204	0.0949474
4	A4	44	68.6051	0.425902	0.0947686
4	A4	45	68.8015	0.420866	0.0943256
4	A4	46	68.9979	0.414184	0.0936438
4	A4	47	69.1943	0.409866	0.0927519
4	A4	48	69.3908	0.404322	0.091666
4	A4	49	69.5872	0.399067	0.0903945
4	A4	50	69.7836	0.393299	0.0889727
4	A4	51	69.98	0.388041	0.0875029
4	A4	52	70.1764	0.382846	0.0861642
4	A4	53	70.3728	0.378288	0.0851798
4	A4	54	70.5692	0.374565	0.0847593
4	A4	55	70.7656	0.368571	0.0850616
4	A4	56	70.9621	0.363977	0.0862004
4	A4	57	71.1585	0.359389	0.0882837
4	A4	58	71.3549	0.3538	0.0914451
4	A4	59	71.5513	0.348665	0.0958453
4	A4	60	71.7477	0.344132	0.101649
4	A4	61	71.9441	0.338093	0.108995
4	A4	62	72.1405	0.331369	0.117983
4	A4	63	72.3369	0.324797	0.128662
4	A4	64	72.5333	0.317468	0.141023
4	A4	65	72.7298	0.309712	0.15497
4	A4	66	72.9262	0.300054	0.170288
4	A4	67	73.1226	0.289836	0.186624
4	A4	68	73.319	0.277959	0.203475
4	A4	69	73.5154	0.265414	0.220192
4	A4	70	73.7118	0.251805	0.236006
4	A4	71	73.9082	0.236504	0.250095
4	A4	72	74.1046	0.21991	0.261703
4	A4	73	74.301	0.203049	0.270281
4	A4	74	74.4975	0.186544	0.275627
4	A4	75	74.6939	0.168454	0.277943
4	A4	76	74.8903	0.151411	0.27778
4	A4	77	75.0867	0.135645	0.275842
4	A4	78	75.2831	0.12072	0.272717
4	A4	79	75.4795	0.104804	0.268615
4	A4	80	75.6759	0.0894141	0.263241
4	A4	81	75.8723	0.0738426	0.255841
4	A4	82	76.0688	0.0582144	0.245438
4	A4	83	76.2652	0.0425607	0.231169
4	A4	84	76.4616	0.0277074	0.212632
4	A4	85	76.658	0.0142379	0.190129
4	A4	86	76.8544	0.00308431	0.16471
4	A4	87	77.0508	-0.00463779	0.138004
4	A4	88	77.2472	-0.0107284	0.111891
4	A4	89	77.4436	-0.0141298	0.0881171
4	A4	90	77.6401	-0.0173969	0.0679889
4	A4	91	77.8365	-0.0184194	0.0522009
4	A4	92	78.0329	-0.0196859	0.0408259
4	A4	93	78.2293	-0.0206705	0.0334212
4	A4	94	78.4257	-0.0222083	0.0291988
4	A4	95	78.6221	-0.0229362	0.0272084
4	A4	96	78.8185	-0.0248231	0.026497
4	A4	97	79.0149	-0.0267853	0.0262276
4	A4	98	79.2113	-0.0282889	0.025756
4	A4	99	79.4078	-0.0300884	0.0246739
4	A4	100	79.6042	-0.0319215	0.0228262
4	A4	101	79.8006	-0.0337771	0.0202974
4	A4	102	79.997	-0.0345057	0.017357
4	A4	103	80.1934	-0.0356099	0.0143603
4	A4	104	80.3898	-0.0347923	0.0116295
4	A4	105	80.5862	-0.0358647	0.00936182
4	A4	106	80.7826	-0.0358388	0.00760307
4	A4	107	80.979	-0.0367355	0.00629091
4	A4	108	81.1755	-0.036833	0.00532725
4	A4	109	81.3719	-0.0372522	0.00463246
4	A4	110	81.5683	-0.0366408	0.00415786
4	A4	111	81.7647	-0.0376239	0.00386909
4	A4	112	81.9611	-0.0373299	0.00372823
4	A4	113	82.1575	-0.0377297	0.0036912
4	A4	114	82.3539	-0.03827	0.00371654
4	A4	115	82.5503	-0.0379393	0.00377181
4	A4	116	82.7468	-0.0381658	0.00383026
4	A4	117	82.9432	-0.0389941	0.00386162
4	A4	118	83.1396	-0.0387787	0.00382753
4	A4	119	83.336	-0.0386309	0.003689
4	A4	120	83.5324	-0.0398931	0.00342468
4	A4	121	83.7288	-0.0394886	0.00304941
4	A4	122	83.9252	-0.0399977	0.00261847
4	A4	123	84.1216	-0.0400548	0.00221002
4	A4	124	84.3181	-0.0391629	0.00189287
4	A4	125	84.5145	-0.0405991	0.00169809
4	A4	126	84.7109	-0.0396635	0.0016107
4	A4	127	84.9073	-0.0400166	0.00158513
4	A4	128	85.1037	-0.0404666	0.00157386
4	A4	129	85.3001	-0.0402753	0.00155375
4	A4	130	85.4965	-0.0406752	0.0015375
4	A4	131	85.6929	-0.0402211	0.0015659
4	A4	132	85.8893	-0.0408107	0.00168463
4	A4	133	86.0858	-0.0406469	0.00191646
4	A4	134	86.2822	-0.0402073	0.00224217
4	A4	135	86.4786	-0.0410897	0.00260002
4	A4	136	86.675	-0.0411029	0.0029054
4	A4	137	86.8714	-0.0411659	0.00308213
4	A4	138	87.0678	-0.0418997	0.00309142
4	A4	139	87.2642	-0.0416583	0.00294651
4	A4	140	87.4606	-0.0420244	0.00270703
4	A4	141	87.6571	-0.0423325	0.00245444
4	A4	142	87.8535	-0.0421153	0.00225706
4	A4	143	88.0499	-0.0419398	0.00214015
4	A4	144	88.2463	-0.0422263	0.00207795
4	A4	145	88.4427	-0.0425157	0.00201536
4	A4	146	88.6391	-0.0430151	0.00190746
4	A4	147	88.8355	-0.0427166	0.00175121
4	A4	148	89.0319	-0.0430325	0.00158802
4	A4	149	89.2283	-0.0424457	0.00147659
4	A4	150	89.4248	-0.0434149	0.00145587
4	A4	151	89.6212	-0.0428374	0.00152172
4	A4	152	89.8176	-0.0430473	0.00162985
4	A4	153	90.014	-0.0433289	0.00172078
4	A4	154	90.2104	-0.0437755	0.00175146
4	A4	155	90.4068	-0.0435291	0.00171458
4	A4	156	90.6032	-0.0436915	0.00163417
4	A4	157	90.7996	-0.043309	0.00154202
4	A4	158	90.9961	-0.0439618	0.00145421
4	A4	159	91.1925	-0.0439775	0.00136658
4	A4	160	91.3889	-0.0440093	0.00127076
4	A4	161	91.5853	-0.0440759	0.00117375
4	A4	162	91.7817	-0.0439996	0.00110238
4	A4	163	91.9781	-0.0439753	0.00108816
4	A4	164	92.1745	-0.0441963	0.00114459
4	A4	165	92.3709	-0.0443179	0.00125291
4	A4	166	92.5674	-0.044032	0.00136608
4	A4	167	92.7638	-0.0444182	0.00143027
4	A4	168	92.9602	-0.0450271	0.00141398
4	A4	169	93.1566	-0.0448151	0.00132816
4	A4	170	93.353	-0.0442206	0.00122288
4	A4	171	93.5494	-0.044756	0.0011597
4	A4	172	93.7458	-0.0447538	0.00117594
4	A4	173	93.9422	-0.0448322	0.00126225
4	A4	174	94.1386	-0.0449717	0.00136523
4	A4	175	94.3351	-0.0447267	0.00141144
4	A4	176	94.5315	-0.0453264	0.00134107
4	A4	177	94.7279	-0.045975	0.00113676
4	A4	178	94.9243	-0.0450153	0.000833762
5	A5	1	60.1594	0.818412	0.0554522
5	A5	2	60.3558	0.816738	0.0537611
5	A5	3	60.5522	0.815507	0.0518967
5	A5	4	60.7486	0.813447	0.0502387
5	A5	5	60.945	0.809068	0.0491237
5	A5	6	61.1415	0.805154	0.0487778
5	A5	7	61.3379	0.802583	0.0492916
5	A5	8	61.5343	0.80073	0.0506227
5	A5	9	61.7307	0.797295	0.052611
5	A5	10	61.9271	0.79243	0.0550211
5	A5	11	62.1235	0.78961	0.0575977
5	A5	12	62.3199	0.78412	0.0601296
5	A5	13	62.5163	0.781316	0.0624729
5	A5	14	62.7128	0.775776	0.0645522
5	A5	15	62.9092	0.772227	0.0663469
5	A5	16	63.1056	0.76701	0.0678936
5	A5	17	63.302	0.762012	0.069286
5	A5	18	63.4984	0.757258	0.0706538
5	A5	19	63.6948	0.75282	0.0721053
5	A5	20	63.8912	0.74855	0.0736572
5	A5	21	64.0876	0.743589	0.0752081
5	A5	22	64.284	0.737992	0.0765831
5	A5	23	64.4805	0.732188	0.0776276
5	A5	24	64.6769	0.725359	0.0782899
5	A5	25	64.8733	0.721938	0.0786463
5	A5	26	65.0697	0.715721	0.0788493
5	A5	27	65.2661	0.710918	0.0790534
5	A5	28	65.4625	0.704921	0.0793592
5	A5	29	65.6589	0.700224	0.0797976
5	A5	30	65.8553	0.694548	0.0803423
5	A5	31	66.0518	0.689147	0.0809368
5	A5	32	66.2482	0.683336	0.0815097
5	A5	33	66.4446	0.678141	0.0819915
5	A5	34	66.641	0.672492	0.0823271
5	A5	35	66.8374	0.666086	0.0824934
5	A5	36	67.0338	0.660676	0.0825122
5	A5	37	67.2302	0.654751	0.0824485
5	A5	38	67.4266	0.650084	0.0823945
5	A5	39	67.623	0.643492	0.082441
5	A5	40	67.8195	0.638519	0.0826487
5	A5	41	68.0159	0.632358	0.0830235
5	A5	42	68.2123	0.627789	0.0835115
5	A5	43	68.4087	0.621277	0.0840136
5	A5	44	68.6051	0.615042	0.0844254
5	A5	45	68.8015	0.609521	0.0846834
5	A5	46	68.9979	0.603653	0.0847927
5	A5	47	69.1943	0.59791	0.0848295
5	A5	48	69.3908	0.592204	0.0849118
5	A5	49	69.5872	0.586174	0.0851701
5	A5	50	69.7836	0.581586	0.0857103
5	A5	51	69.98	0.574399	0.0866014
5	A5	52	70.1764	0.569477	0.0878687
5	A5	53	70.3728	0.563475	0.0895008
5	A5	54	70.5692	0.557302	0.0914559
5	A5	55	70.7656	0.550617	0.09367
5	A5	56	70.9621	0.544068	0.0960462
5	A5	57	71.1585	0.538274	0.0984504
5	A5	58	71.3549	0.530597	0.100695
5	A5	59	71.5513	0.523565	0.102556
5	A5	60	71.7477	0.516309	0.103804
5	A5	61	71.9441	0.508684	0.10427
5	A5	62	72.1405	0.501647	0.103909
5	A5	63	72.3369	0.494282	0.102864
5	A5	64	72.5333	0.486096	0.101487
5	A5	65	72.7298	0.480354	0.100311
5	A5	66	72.9262	0.474302	0.099974
5	A5	67	73.1226	0.468168	0.101122
5	A5	68	73.319	0.461919	0.10434
5	A5	69	73.5154	0.454765	0.110118
5	A5	70	73.7118	0.448605	0.118862
5	A5	71	73.9082	0.440714	0.130901
5	A5	72	74.1046	0.431994	0.146462
5	A5	73	74.301	0.423236	0.165615
5	A5	74	74.4975	0.411468	0.188184
5	A5	75	74.6939	0.398885	0.213643
5	A5	76	74.8903	0.383421	0.241022
5	A5	77	75.0867	0.366299	0.268865
5	A5	78	75.2831	0.34588	0.295276
5	A5	79	75.4795	0.323547	0.318097
5	A5	80	75.6759	0.296752	0.335195
5	A5	81	75.8723	0.271358	0.344806
5	A5	82	76.0688	0.242866	0.345834
5	A5	83	76.2652	0.217498	0.338021
5	A5	84	76.4616	0.191259	0.321978
5	A5	85	76.658	0.168489	0.299064
5	A5	86	76.8544	0.148195	0.271179
5	A5	87	77.0508	0.131267	0.2405
5	A5	88	77.2472	0.116462	0.209209
5	A5	89	77.4436	0.106217	0.179256
5	A5	90	77.6401	0.0964037	0.152193
5	A5	91	77.8365	0.0890777	0.1291
5	A5	92	78.0329	0.0832305	0.110601
5	A5	93	78.2293	0.0781018	0.0969488
5	A5	94	78.4257	0.0730447	0.0881177
5	A5	95	78.6221	0.0687612	0.0838774
5	A5	96	78.8185	0.0648342	0.0837988
5	A5	97	79.0149	0.0601774	0.087208
5	A5	98	79.2113	0.0543279	0.0931273
5	A5	99	79.4078	0.0482958	0.10026
5	A5	100	79.6042	0.0403094	0.107069
5	A5	101	79.8006	0.0307553	0.111951
5	A5	102	79.997	0.0209143	0.113494
5	A5	103	80.1934	0.0118259	0.110744
5	A5	104	80.3898	0.00255261	0.103431
5	A5	105	80.5862	-0.00627492	0.0920741
5	A5	106	80.7826	-0.0126795	0.0779175
5	A5	107	80.979	-0.0159946	0.0626604
5	A5	108	81.1755	-0.0167893	0.0480492
5	A5	109	81.3719	-0.0179474	0.0354589
5	A5	110	81.5683	-0.0181917	0.025626
5	A5	111	81.7647	-0.0186181	0.0186197
5	A5	112	81.9611	-0.0203141	0.0140247
5	A5	113	82.1575	-0.0201429	0.0112124
5	A5	114	82.3539	-0.0210072	0.00957362
5	A5	115	82.5503	-0.0212293	0.00864172
5	A5	116	82.7468	-0.0219299	0.00810997
5	A5	117	82.9432	-0.0226062	0.00779074
5	A5	118	83.1396	-0.0228142	0.00756657
5	A5	119	83.336	-0.0230675	0.00736281
5	A5	120	83.5324	-0.0241586	0.007146
5	A5	121	83.7288	-0.0249185	0.00693129
5	A5	122	83.9252	-0.0250442	0.00677777
5	A5	123	84.1216	-0.0248468	0.00676184
5	A5	124	84.3181	-0.0257192	0.00693987
5	A5	125	84.5145	-0.0259714	0.00732517
5	A5	126	84.7109	-0.026546	0.00789549
5	A5	127	84.9073	-0.0270062	0.00862609
5	A5	128	85.1037	-0.0281407	0.00952367
5	A5	129	85.3001	-0.0284785	0.0106331
5	A5	130	85.4965	-0.0290466	0.0120032
5	A5	131	85.6929	-0.0299295	0.0136231
5	A5	132	85.8893	-0.030485	0.0153622
5	A5	133	86.0858	-0.0315396	0.0169543
5	A5	134	86.2822	-0.0337394	0.0180483
5	A5	135	86.4786	-0.0355733	0.0183164
5	A5	136	86.675	-0.03695	0.0175732
5	A5	137	86.8714	-0.0391925	0.0158505
5	A5	138	87.0678	-0.039881	0.0133932
5	A5	139	87.2642	-0.0400546	0.0105794
5	A5	140	87.4606	-0.040148	0.00780658
5	A5	141	87.6571	-0.0408553	0.00539351
5	A5	142	87.8535	-0.040709	0.00352819
5	A5	143	88.0499	-0.0401077	0.00226208
5	A5	144	88.2463	-0.0407633	0.00153403
5	A5	145	88.4427	-0.0399683	0.0012089
5	A5	146	88.6391	-0.0406839	0.00112282
5	A5	147	88.8355	-0.0410065	0.0011288
5	A5	148	89.0319	-0.0407316	0.00113138
5	A5	149	89.2283	-0.0411666	0.00109853
5	A5	150	89.4248	-0.0410292	0.00104718
5	A5	151	89.6212	-0.0409864	0.0010115
5	A5	152	89.8176	-0.0408474	0.00101213
5	A5	153	90.014	-0.0412259	0.0010427
5	A5	154	90.2104	-0.0412641	0.00107824
5	A5	155	90.4068	-0.041988	0.00109438
5	A5	156	90.6032	-0.0408465	0.00108063
5	A5	157	90.7996	-0.0413544	0.0010401
5	A5	158	90.9961	-0.0418367	0.000982211
5	A5	159	91.1925	-0.0419998	0.000918896
5	A5	160	91.3889	-0.0412959	0.000865869
5	A5	161	91.5853	-0.0416348	0.000842125
5	A5	162	91.7817	-0.0418751	0.000862696
5	A5	163	91.9781	-0.0420994	0.000927616
5	A5	164	92.1745	-0.0414302	0.00101443
5	A5	165	92.3709	-0.0418975	0.00108038
5	A5	166	92.5674	-0.0424633	0.00107686
5	A5	167	92.7638	-0.0422774	0.000972859
5	A5	168	92.9602	-0.0423753	0.00077694
5	A5	169	93.1566	-0.0421565	0.000543892
5	A5	170	93.353	-0.0423568	0.000358381
5	A5	171	93.5494	-0.0423909	0.000300733
5	A5	172	93.7458	-0.0414458	0.000410232
5	A5	173	93.9422	-0.0424264	0.00066309
5	A5	174	94.1386	-0.0424497	0.000976068
5	A5	175	94.3351	-0.0422189	0.0012361
5	A5	176	94.5315	-0.0427039	0.00134475
5	A5	177	94.7279	-0.043371	0.0012583
5	A5	178	94.9243	-0.0430103	0.00100413
6	A6	1	60.1594	0.914013	0.0791103
6	A6	2	60.3558	0.911345	0.0770907
6	A6	3	60.5522	0.907703	0.0746735
6	A6	4	60.7486	0.906225	0.0724713
6	A6	5	60.945	0.902913	0.0711173
6	A6	6	61.1415	0.900464	0.0710238
6	A6	7	61.3379	0.897549	0.0722303
6	A6	8	61.5343	0.893986	0.0744143
6	A6	9	61.7307	0.891707	0.0770475
6	A6	10	61.9271	0.887684	0.0796228
6	A6	11	62.1235	0.881303	0.0818488
6	A6	12	62.3199	0.879471	0.0837155
6	A6	13	62.5163	0.874644	0.0854073
6	A6	14	62.7128	0.872359	0.0871318
6	A6	15	62.9092	0.867975	0.0889738
6	A6	16	63.1056	0.863651	0.0908628
6	A6	17	63.302	0.859173	0.0926633
6	A6	18	63.4984	0.855555	0.0942932
6	A6	19	63.6948	0.849861	0.0957923
6	A6	20	63.8912	0.846416	0.097292
6	A6	21	64.0876	0.842594	0.0989277
6	A6	22	64.284	0.837737	0.100753
6	A6	23	64.4805	0.832829	0.102711
6	A6	24	64.6769	0.828393	0.104662
6	A6	25	64.8733	0.823616	0.106462
6	A6	26	65.0697	0.818463	0.108026
6	A6	27	65.2661	0.812895	0.109369
6	A6	28	65.4625	0.808697	0.1106
6	A6	29	65.6589	0.803253	0.111876
6	A6	30	65.8553	0.798615	0.113338
6	A6	31	66.0518	0.793244	0.11505
6	A6	32	66.2482	0.788314	0.116982
6	A6	33	66.4446	0.783599	0.119013
6	A6	34	66.641	0.776526	0.120984
6	A6	35	66.8374	0.771393	0.122744
6	A6	36	67.0338	0.767175	0.124207
6	A6	37	67.2302	0.759251	0.125385
6	A6	38	67.4266	0.754011	0.126391
6	A6	39	67.623	0.748794	0.127373
6	A6	40	67.8195	0.742471	0.128411
6	A6	41	68.0159	0.737614	0.129409
6	A6	42	68.2123	0.731747	0.130083
6	A6	43	68.4087	0.725571	0.130081
6	A6	44	68.6051	0.716933	0.12917
6	A6	45	68.8015	0.711425	0.127372
6	A6	46	68.9979	0.707499	0.124961
6	A6	47	69.1943	0.701439	0.122331
6	A6	48	69.3908	0.695362	0.119831
6	A6	49	69.5872	0.69096	0.11766
6	A6	50	69.7836	0.685127	0.115855
6	A6	51	69.98	0.680421	0.114348
6	A6	52	70.1764	0.675749	0.113059
6	A6	53	70.3728	0.669563	0.111988
6	A6	54	70.5692	0.664236	0.111265
6	A6	55	70.7656	0.659918	0.111111
6	A6	56	70.9621	0.655211	0.111734
6	A6	57	71.1585	0.650844	0.11322
6	A6	58	71.3549	0.645415	0.115505
6	A6	59	71.5513	0.640316	0.118453
6	A6	60	71.7477	0.633339	0.121981
6	A6	61	71.9441	0.628748	0.126152
6	A6	62	72.1405	0.623822	0.131143
6	A6	63	72.3369	0.617242	0.137148
6	A6	64	72.5333	0.611992	0.144271
6	A6	65	72.7298	0.605403	0.152489
6	A6	66	72.9262	0.597134	0.161693
6	A6	67	73.1226	0.590881	0.171758
6	A6	68	73.319	0.582572	0.182576
6	A6	69	73.5154	0.573298	0.194073
6	A6	70	73.7118	0.56546	0.206191
6	A6	71	73.9082	0.554104	0.218885
6	A6	72	74.1046	0.544901	0.232137
6	A6	73	74.301	0.534681	0.245982
6	A6	74	74.4975	0.521361	0.260541
6	A6	75	74.6939	0.510223	0.275998
6	A6	76	74.8903	0.496918	0.292491
6	A6	77	75.0867	0.484548	0.309935
6	A6	78	75.2831	0.469805	0.327828
6	A6	79	75.4795	0.455219	0.345178
6	A6	80	75.6759	0.438179	0.360625
6	A6	81	75.8723	0.41943	0.37273
6	A6	82	76.0688	0.400433	0.380332
6	A6	83	76.2652	0.382737	0.382817
6	A6	84	76.4616	0.363419	0.38023
6	A6	85	76.658	0.34515	0.373217
6	A6	86	76.8544	0.328308	0.362865
6	A6	87	77.0508	0.311351	0.350453
6	A6	88	77.2472	0.296752	0.337177
6	A6	89	77.4436	0.281765	0.323865
6	A6	90	77.6401	0.26915	0.310765
6	A6	91	77.8365	0.254489	0.297486
6	A6	92	78.0329	0.242016	0.283168
6	A6	93	78.2293	0.22794	0.266854
6	A6	94	78.4257	0.213885	0.247941
6	A6	95	78.6221	0.203584	0.226522
6	A6	96	78.8185	0.193667	0.203462
6	A6	97	79.0149	0.186179	0.180164
6	A6	98	79.2113	0.179567	0.158162
6	A6	99	79.4078	0.174793	0.138691
6	A6	100	79.6042	0.170163	0.122416
6	A6	101	79.8006	0.165531	0.109387
6	A6	102	79.997	0.161388	0.0991826
6	A6	103	80.1934	0.157129	0.0911539
6	A6	104	80.3898	0.153621	0.08465
6	A6	105	80.5862	0.150043	0.0791686
6	A6	106	80.7826	0.14672	0.0744128
6	A6	107	80.979	0.143721	0.0702728
6	A6	108	81.1755	0.140179	0.0667592
6	A6	109	81.3719	0.138088	0.0639155
6	A6	110	81.5683	0.13597	0.0617427
6	A6	111	81.7647	0.132694	0.0601663
6	A6	112	81.9611	0.129783	0.0590526
6	A6	113	82.1575	0.127071	0.0582566
6	A6	114	82.3539	0.125652	0.0576557
6	A6	115	82.5503	0.121819	0.0571564
6	A6	116	82.7468	0.119661	0.0566778
6	A6	117	82.9432	0.117721	0.056143
6	A6	118	83.1396	0.11461	0.0554984
6	A6	119	83.336	0.111706	0.0547468
6	A6	120	83.5324	0.109101	0.0539641
6	A6	121	83.7288	0.107596	0.0532774
6	A6	122	83.9252	0.105088	0.052806
6	A6	123	84.1216	0.102724	0.0526096
6	A6	124	84.3181	0.0999769	0.0526793
6	A6	125	84.5145	0.0982264	0.0529783
6	A6	126	84.7109	0.0953193	0.0535014
6	A6	127	84.9073	0.0924839	0.0543062
6	A6	128	85.1037	0.0906748	0.0554746
6	A6	129	85.3001	0.0880741	0.0570188
6	A6	130	85.4965	0.0860682	0.0587793
6	A6	131	85.6929	0.0831918	0.060403
6	A6	132	85.8893	0.0800208	0.0614466
6	A6	133	86.0858	0.0754247	0.0615914
6	A6	134	86.2822	0.0731575	0.0608808
6	A6	135	86.4786	0.0702344	0.0598841
6	A6	136	86.675	0.0683267	0.0597462
6	A6	137	86.8714	0.0658341	0.0621323
6	A6	138	87.0678	0.0641856	0.0690757
6	A6	139	87.2642	0.0623669	0.0826623
6	A6	140	87.4606	0.0594248	0.10443
6	A6	141	87.6571	0.0568857	0.134453
6	A6	142	87.8535	0.0525329	0.170356
6	A6	143	88.0499	0.0462616	0.206858
6	A6	144	88.2463	0.0334896	0.236488
6	A6	145	88.4427	0.0118948	0.25169
6	A6	146	88.6391	-0.0200034	0.24761
6	A6	147	88.8355	-0.0345825	0.224187
6	A6	148	89.0319	-0.0368602	0.186329
6	A6	149	89.2283	-0.0379336	0.141994
6	A6	150	89.4248	-0.0376224	0.0992312
6	A6	151	89.6212	-0.0376381	0.0637259
6	A6	152	89.8176	-0.0386169	0.0378348
6	A6	153	90.014	-0.0380895	0.0211007
6	A6	154	90.2104	-0.0376365	0.0115029
6	A6	155	90.4068	-0.0381494	0.00665318
6	A6	156	90.6032	-0.0386535	0.00452414
6	A6	157	90.7996	-0.0386524	0.00370702
6	A6	158	90.9961	-0.0390312	0.00337877
6	A6	159	91.1925	-0.0389799	0.00314935
6	A6	160	91.3889	-0.0390349	0.00288987
6	A6	161	91.5853	-0.038919	0.00259263
6	A6	162	91.7817	-0.0396353	0.00228757
6	A6	163	91.9781	-0.0392856	0.00201184
6	A6	164	92.1745	-0.0396924	0.00180427
6	A6	165	92.3709	-0.0392712	0.00169466
6	A6	166	92.5674	-0.0390043	0.00168323
6	A6	167	92.7638	-0.0397785	0.00173214
6	A6	168	92.9602	-0.0402814	0.00178673
6	A6	169	93.1566	-0.0396346	0.00181293
6	A6	170	93.353	-0.03981	0.00181543
6	A6	171	93.5494	-0.039877	0.00181757
6	A6	172	93.7458	-0.039892	0.00182225
6	A6	173	93.9422	-0.0401242	0.00179358
6	A6	174	94.1386	-0.0405454	0.00167857
6	A6	175	94.3351	-0.0403661	0.00145001
6	A6	176	94.5315	-0.0403943	0.00113308
6	A6	177	94.7279	-0.0403455	0.000794345
6	A6	178	94.9243	-0.0401607	0.000504066
7	A7	1	60.1594	0.896388	0.023436
7	A7	2	60.3558	0.894812	0.0227453
7	A7	3	60.5522	0.894741	0.0219847
7	A7	4	60.7486	0.893674	0.0213236
7	A7	5	60.945	0.890655	0.0209117
7	A7	6	61.1415	0.889064	0.0208358
7	A7	7	61.3379	0.888768	0.0210947
7	A7	8	61.5343	0.886369	0.0216113
7	A7	9	61.7307	0.884696	0.0222709
7	A7	10	61.9271	0.883727	0.0229829
7	A7	11	62.1235	0.87836	0.023731
7	A7	12	62.3199	0.878959	0.0245814
7	A7	13	62.5163	0.876901	0.0256368
7	A7	14	62.7128	0.874754	0.0269771
7	A7	15	62.9092	0.872263	0.0286223
7	A7	16	63.1056	0.870709	0.0305451
7	A7	17	63.302	0.86691	0.0327146
7	A7	18	63.4984	0.864629	0.0351279
7	A7	19	63.6948	0.861422	0.0378089
7	A7	20	63.8912	0.859239	0.040767
7	A7	21	64.0876	0.855362	0.0439533
7	A7	22	64.284	0.851438	0.0472474
7	A7	23	64.4805	0.848047	0.0504851
7	A7	24	64.6769	0.842135	0.0535128
7	A7	25	64.8733	0.837766	0.0562423
7	A7	26	65.0697	0.833808	0.0586665
7	A7	27	65.2661	0.826407	0.0608354
7	A7	28	65.4625	0.822841	0.0628025
7	A7	29	65.6589	0.818904	0.0645747
7	A7	30	65.8553	0.811433	0.0661032
7	A7	31	66.0518	0.805478	0.0673146
7	A7	32	66.2482	0.800835	0.0681646
7	A7	33	66.4446	0.794397	0.0686787
7	A7	34	66.641	0.78736	0.0689596
7	A7	35	66.8374	0.782995	0.0691559
7	A7	36	67.0338	0.777595	0.0694196
7	A7	37	67.2302	0.770195	0.0698577
7	A7	38	67.4266	0.765301	0.0704976
7	A7	39	67.623	0.760694	0.0712723
7	A7	40	67.8195	0.753359	0.0720346
7	A7	41	68.0159	0.747592	0.0726035
7	A7	42	68.2123	0.740489	0.0728323
7	A7	43	68.4087	0.734557	0.0726693
7	A7	44	68.6051	0.727735	0.0721839
7	A7	45	68.8015	0.721979	0.0715448
7	A7	46	68.9979	0.715986	0.0709532
7	A7	47	69.1943	0.711552	0.0705652
7	A7	48	69.3908	0.704735	0.0704374
7	A7	49	69.5872	0.699386	0.0705135
7	A7	50	69.7836	0.693461	0.0706648
7	A7	51	69.98	0.687838	0.0707568
7	A7	52	70.1764	0.679934	0.0707103
7	A7	53	70.3728	0.675541	0.0705289
7	A7	54	70.5692	0.669342	0.0702771
7	A7	55	70.7656	0.662647	0.0700254
7	A7	56	70.9621	0.658589	0.0698031
7	A7	57	71.1585	0.651608	0.0695888
7	A7	58	71.3549	0.645909	0.0693435
7	A7	59	71.5513	0.639347	0.0690602
7	A7	60	71.7477	0.633407	0.0687835
7	A7	61	71.9441	0.6289	0.0685837
7	A7	62	72.1405	0.623459	0.0685041
7	A7	63	72.3369	0.617665	0.0685278
7	A7	64	72.5333	0.61161	0.0685905
7	A7	65	72.7298	0.605299	0.0686308
7	A7	66	72.9262	0.60034	0.0686327
7	A7	67	73.1226	0.594124	0.0686348
7	A7	68	73.319	0.588636	0.0687053
7	A7	69	73.5154	0.583386	0.0689005
7	A7	70	73.7118	0.57677	0.0692417
7	A7	71	73.9082	0.57122	0.0697161
7	A7	72	74.1046	0.566516	0.070298
7	A7	73	74.301	0.559152	0.0709724
7	A7	74	74.4975	0.552912	0.0717405
7	A7	75	74.6939	0.54769	0.0726011
7	A7	76	74.8903	0.54274	0.0735183
7	A7	77	75.0867	0.53544	0.0744001
7	A7	78	75.2831	0.52879	0.0751088
7	A7	79	75.4795	0.522554	0.0754916
7	A7	80	75.6759	0.51592	0.0754115
7	A7	81	75.8723	0.50976	0.0747702
7	A7	82	76.0688	0.503748	0.0735286
7	A7	83	76.2652	0.496963	0.0717406
7	A7	84	76.4616	0.489737	0.0695841
7	A7	85	76.658	0.484609	0.0673493
7	A7	86	76.8544	0.479165	0.0653642
7	A7	87	77.0508	0.475964	0.0638742
7	A7	88	77.2472	0.470311	0.0629509
7	A7	89	77.4436	0.465124	0.0624815
7	A7	90	77.6401	0.459086	0.0622478
7	A7	91	77.8365	0.453448	0.0620342
7	A7	92	78.0329	0.448865	0.0617055
7	A7	93	78.2293	0.443736	0.0612226
7	A7	94	78.4257	0.438069	0.0606186
7	A7	95	78.6221	0.433237	0.0599639
7	A7	96	78.8185	0.428555	0.0593461
7	A7	97	79.0149	0.423112	0.0588488
7	A7	98	79.2113	0.418503	0.0585308
7	A7	99	79.4078	0.4146	0.0583989
7	A7	100	79.6042	0.409148	0.0584001
7	A7	101	79.8006	0.404095	0.0584412
7	A7	102	79.997	0.39878	0.0584315
7	A7	103	80.1934	0.393803	0.058321
7	A7	104	80.3898	0.389332	0.0581104
7	A7	105	80.5862	0.38457	0.057834
7	A7	106	80.7826	0.379611	0.0575275
7	A7	107	80.979	0.374742	0.0572095
7	A7	108	81.1755	0.370357	0.0568785
7	A7	109	81.3719	0.365279	0.0565266
7	A7	110	81.5683	0.360139	0.0561503
7	A7	111	81.7647	0.355893	0.0557587
7	A7	112	81.9611	0.351658	0.0553753
7	A7	113	82.1575	0.346287	0.0550335
7	A7	114	82.3539	0.341972	0.0547721
7	A7	115	82.5503	0.337752	0.0546228
7	A7	116	82.7468	0.333339	0.0545978
7	A7	117	82.9432	0.329188	0.0546751
7	A7	118	83.1396	0.324017	0.0548048
7	A7	119	83.336	0.319214	0.0549248
7	A7	120	83.5324	0.314612	0.0549837
7	A7	121	83.7288	0.31067	0.0549571
7	A7	122	83.9252	0.305589	0.0548497
7	A7	123	84.1216	0.299991	0.0546866
7	A7	124	84.3181	0.296462	0.0544973
7	A7	125	84.5145	0.292374	0.0542995
7	A7	126	84.7109	0.287379	0.0540956
7	A7	127	84.9073	0.282045	0.0538854
7	A7	128	85.1037	0.277889	0.0536857
7	A7	129	85.3001	0.273648	0.05354
7	A7	130	85.4965	0.269224	0.0535082
7	A7	131	85.6929	0.264886	0.0536557
7	A7	132	85.8893	0.260755	0.0540698
7	A7	133	86.0858	0.255377	0.0549283
7	A7	134	86.2822	0.250998	0.0566262
7	A7	135	86.4786	0.24733	0.0599559
7	A7	136	86.675	0.242733	0.0663044
7	A7	137	86.8714	0.237255	0.0777824
7	A7	138	87.0678	0.232794	0.0971037
7	A7	139	87.2642	0.227408	0.126975
7	A7	140	87.4606	0.222487	0.168866
7	A7	141	87.6571	0.212413	0.221372
7	A7	142	87.8535	0.198405	0.278901
7	A7	143	88.0499	0.173668	0.331724
7	A7	144	88.2463	0.126416	0.368111
7	A7	145	88.4427	0.0503029	0.378199
7	A7	146	88.6391	-0.0187916	0.357951
7	A7	147	88.8355	-0.041092	0.311072
7	A7	148	89.0319	-0.0440835	0.247697
7	A7	149	89.2283	-0.0440558	0.180506
7	A7	150	89.4248	-0.0443835	0.120341
7	A7	151	89.6212	-0.0445762	0.0734376
7	A7	152	89.8176	-0.0450869	0.0410959
7	A7	153	90.014	-0.0450043	0.0211879
7	A7	154	90.2104	-0.0450354	0.0101993
7	A7	155	90.4068	-0.0447758	0.0047776
7	A7	156	90.6032	-0.0445749	0.00243564
7	A7	157	90.7996	-0.0451143	0.00160211
7	A7	158	90.9961	-0.044991	0.00138652
7	A7	159	91.1925	-0.0458752	0.00132889
7	A7	160	91.3889	-0.0455729	0.00123335
7	A7	161	91.5853	-0.0460832	0.00106947
7	A7	162	91.7817	-0.045377	0.000896182
7	A7	163	91.9781	-0.0453187	0.000788379
7	A7	164	92.1745	-0.0456295	0.000779158
7	A7	165	92.3709	-0.0457019	0.000840055
7	A7	166	92.5674	-0.0461049	0.000904751
7	A7	167	92.7638	-0.0460341	0.00091591
7	A7	168	92.9602	-0.0463191	0.00086175
7	A7	169	93.1566	-0.0464287	0.000778315
7	A7	170	93.353	-0.0454221	0.000718479
7	A7	171	93.5494	-0.0462271	0.000712386
7	A7	172	93.7458	-0.0459555	0.000749051
7	A7	173	93.9422	-0.0469101	0.000790358
7	A7	174	94.1386	-0.0467842	0.000801418
7	A7	175	94.3351	-0.0460148	0.000769709
7	A7	176	94.5315	-0.0462249	0.000700652
7	A7	177	94.7279	-0.0468316	0.00060207
7	A7	178	94.9243	-0.0472023	0.000477661
8	A8	1	60.1594	0.88574	0.0732614
8	A8	2	60.3558	0.881534	0.0727367
8	A8	3	60.5522	0.87852	0.0721704
8	A8	4	60.7486	0.875949	0.0717428
8	A8	5	60.945	0.872587	0.0715938
8	A8	6	61.1415	0.868431	0.0717565
8	A8	7	61.3379	0.863759	0.0721634
8	A8	8	61.5343	0.861499	0.0727033
8	A8	9	61.7307	0.855772	0.0732974
8	A8	10	61.9271	0.852874	0.0739305
8	A8	11	62.1235	0.848683	0.0746314
8	A8	12	62.3199	0.844984	0.0754327
8	A8	13	62.5163	0.840559	0.0763365
8	A8	14	62.7128	0.836867	0.0773053
8	A8	15	62.9092	0.83279	0.0782927
8	A8	16	63.1056	0.8286	0.0792808
8	A8	17	63.302	0.823165	0.080299
8	A8	18	63.4984	0.819922	0.0814023
8	A8	19	63.6948	0.816721	0.0826293
8	A8	20	63.8912	0.810751	0.0839674
8	A8	21	64.0876	0.807388	0.0853555
8	A8	22	64.284	0.801288	0.086718
8	A8	23	64.4805	0.798051	0.0880116
8	A8	24	64.6769	0.792634	0.0892454
8	A8	25	64.8733	0.787688	0.0904814
8	A8	26	65.0697	0.782912	0.0918017
8	A8	27	65.2661	0.778112	0.0932658
8	A8	28	65.4625	0.773812	0.0948755
8	A8	29	65.6589	0.768423	0.0965661
8	A8	30	65.8553	0.762856	0.0982354
8	A8	31	66.0518	0.757743	0.0997971
8	A8	32	66.2482	0.752169	0.101212
8	A8	33	66.4446	0.747209	0.102492
8	A8	34	66.641	0.740428	0.103677
8	A8	35	66.8374	0.736695	0.104804
8	A8	36	67.0338	0.729928	0.105904
8	A8	37	67.2302	0.723952	0.10701
8	A8	38	67.4266	0.71878	0.108156
8	A8	39	67.623	0.712552	0.109356
8	A8	40	67.8195	0.707584	0.110556
8	A8	41	68.0159	0.701198	0.111597
8	A8	42	68.2123	0.694951	0.112239
8	A8	43	68.4087	0.688557	0.112216
8	A8	44	68.6051	0.682312	0.111345
8	A8	45	68.8015	0.675884	0.109601
8	A8	46	68.9979	0.669936	0.10715
8	A8	47	69.1943	0.664205	0.104305
8	A8	48	69.3908	0.659234	0.101435
8	A8	49	69.5872	0.654372	0.0988699
8	A8	50	69.7836	0.649392	0.096849
8	A8	51	69.98	0.644017	0.0955224
8	A8	52	70.1764	0.638856	0.0949897
8	A8	53	70.3728	0.634877	0.0953292
8	A8	54	70.5692	0.629212	0.0966068
8	A8	55	70.7656	0.625175	0.0988615
8	A8	56	70.9621	0.619112	0.102102
8	A8	57	71.1585	0.613575	0.10631
8	A8	58	71.3549	0.609257	0.11146
8	A8	59	71.5513	0.601707	0.117539
8	A8	60	71.7477	0.596004	0.124554
8	A8	61	71.9441	0.589696	0.132538
8	A8	62	72.1405	0.582545	0.141551
8	A8	63	72.3369	0.574186	0.151673
8	A8	64	72.5333	0.567061	0.162988
8	A8	65	72.7298	0.55793	0.175561
8	A8	66	72.9262	0.549021	0.189394
8	A8	67	73.1226	0.537292	0.20439
8	A8	68	73.319	0.527954	0.220339
8	A8	69	73.5154	0.514815	0.236918
8	A8	70	73.7118	0.50089	0.253754
8	A8	71	73.9082	0.486437	0.270492
8	A8	72	74.1046	0.472236	0.286859
8	A8	73	74.301	0.455105	0.302672
8	A8	74	74.4975	0.43829	0.31779
8	A8	75	74.6939	0.421143	0.332025
8	A8	76	74.8903	0.403302	0.345038
8	A8	77	75.0867	0.383364	0.356282
8	A8	78	75.2831	0.363685	0.365021
8	A8	79	75.4795	0.343101	0.370426
8	A8	80	75.6759	0.321653	0.371742
8	A8	81	75.8723	0.301055	0.36846
8	A8	82	76.0688	0.280487	0.360474
8	A8	83	76.2652	0.259712	0.348156
8	A8	84	76.4616	0.241098	0.332333
8	A8	85	76.658	0.223507	0.314129
8	A8	86	76.8544	0.207697	0.294712
8	A8	87	77.0508	0.193959	0.274993
8	A8	88	77.2472	0.179881	0.2554
8	A8	89	77.4436	0.168143	0.235838
8	A8	90	77.6401	0.15544	0.21586
8	A8	91	77.8365	0.143588	0.195013
8	A8	92	78.0329	0.132335	0.173182
8	A8	93	78.2293	0.124731	0.150799
8	A8	94	78.4257	0.117618	0.128787
8	A8	95	78.6221	0.113274	0.108301
8	A8	96	78.8185	0.109712	0.090369
8	A8	97	79.0149	0.106779	0.0756271
8	A8	98	79.2113	0.104135	0.0642111
8	A8	99	79.4078	0.101465	0.0558342
8	A8	100	79.6042	0.0990726	0.0499596
8	A8	101	79.8006	0.0969792	0.0459801
8	A8	102	79.997	0.0948333	0.0433431
8	A8	103	80.1934	0.0927468	0.0416085
8	A8	104	80.3898	0.0904457	0.040455
8	A8	105	80.5862	0.0884854	0.039661
8	A8	106	80.7826	0.0863065	0.0390754
8	A8	107	80.979	0.0844316	0.0385894
8	A8	108	81.1755	0.0827836	0.0381225
8	A8	109	81.3719	0.0800276	0.0376244
8	A8	110	81.5683	0.0778952	0.0370841
8	A8	111	81.7647	0.0762171	0.0365279
8	A8	112	81.9611	0.0747226	0.0359994
8	A8	113	82.1575	0.0727502	0.0355323
8	A8	114	82.3539	0.0705868	0.0351331
8	A8	115	82.5503	0.0685306	0.0347812
8	A8	116	82.7468	0.0673578	0.034438
8	A8	117	82.9432	0.0653565	0.0340591
8	A8	118	83.1396	0.0637365	0.033608
8	A8	119	83.336	0.060957	0.0330757
8	A8	120	83.5324	0.0598364	0.0324932
8	A8	121	83.7288	0.0583233	0.0319252
8	A8	122	83.9252	0.0565683	0.0314407
8	A8	123	84.1216	0.0548369	0.0310789
8	A8	124	84.3181	0.0534577	0.0308289
8	A8	125	84.5145	0.0518132	0.0306396
8	A8	126	84.7109	0.0497473	0.030451
8	A8	127	84.9073	0.04857	0.030229
8	A8	128	85.1037	0.0464048	0.0299825
8	A8	129	85.3001	0.0448572	0.0297533
8	A8	130	85.4965	0.0442702	0.0295883
8	A8	131	85.6929	0.0420302	0.0295154
8	A8	132	85.8893	0.0401791	0.0295443
8	A8	133	86.0858	0.0390955	0.0297
8	A8	134	86.2822	0.0372897	0.0300847
8	A8	135	86.4786	0.0360629	0.0309603
8	A8	136	86.675	0.0341519	0.0328425
8	A8	137	86.8714	0.0324406	0.0365725
8	A8	138	87.0678	0.0314137	0.0432915
8	A8	139	87.2642	0.0295338	0.0542102
8	A8	140	87.4606	0.0279446	0.0701035
8	A8	141	87.6571	0.0257583	0.0906013
8	A8	142	87.8535	0.022404	0.113574
8	A8	143	88.0499	0.0162426	0.135071
8	A8	144	88.2463	0.00506677	0.150161
8	A8	145	88.4427	-0.0152461	0.154571
8	A8	146	88.6391	-0.0361217	0.146425
8	A8	147	88.8355	-0.0397087	0.127142
8	A8	148	89.0319	-0.0404595	0.100931
8	A8	149	89.2283	-0.0405271	0.0731392
8	A8	150	89.4248	-0.0405651	0.0483536
8	A8	151	89.6212	-0.0403615	0.0292013
8	A8	152	89.8176	-0.0406979	0.0161974
8	A8	153	90.014	-0.0405261	0.00838435
8	A8	154	90.2104	-0.0400188	0.00420609
8	A8	155	90.4068	-0.0413481	0.00218363
8	A8	156	90.6032	-0.0407896	0.00124321
8	A8	157	90.7996	-0.0405924	0.00076345
8	A8	158	90.9961	-0.0410217	0.00047408
8	A8	159	91.1925	-0.0408033	0.000313145
8	A8	160	91.3889	-0.0403712	0.0003014
8	A8	161	91.5853	-0.0411133	0.000456283
8	A8	162	91.7817	-0.0403416	0.000748053
8	A8	163	91.9781	-0.0408583	0.00109333
8	A8	164	92.1745	-0.0410233	0.00137951
8	A8	165	92.3709	-0.0413414	0.00150945
8	A8	166	92.5674	-0.0413436	0.00144743
8	A8	167	92.7638	-0.0414541	0.00124184
8	A8	168	92.9602	-0.0414298	0.00100681
8	A8	169	93.1566	-0.0412279	0.000866097
8	A8	170	93.353	-0.0406045	0.00088755
8	A8	171	93.5494	-0.0415968	0.0010464
8	A8	172	93.7458	-0.0416888	0.00124097
8	A8	173	93.9422	-0.0413618	0.00135149
8	A8	174	94.1386	-0.0421358	0.00130521
8	A8	175	94.3351	-0.0419092	0.0011087
8	A8	176	94.5315	-0.0415124	0.000832451
8	A8	177	94.7279	-0.0418606	0.000564258
8	A8	178	94.9243	-0.0416054	0.000364012
9	A9	1	60.1594	0.682466	0.0653579
9	A9	2	60.3558	0.678876	0.0636952
9	A9	3	60.5522	0.676584	0.0617496
9	A9	4	60.7486	0.672555	0.0599984
9	A9	5	60.945	0.669463	0.0589074
9	A9	6	61.1415	0.667974	0.0587607
9	A9	7	61.3379	0.662278	0.0595869
9	A9	8	61.5343	0.658967	0.0611996
9	A9	9	61.7307	0.655798	0.0633077
9	A9	10	61.9271	0.650683	0.065618
9	A9	11	62.1235	0.64658	0.0678948
9	A9	12	62.3199	0.641515	0.0699763
9	A9	13	62.5163	0.637917	0.0717628
9	A9	14	62.7128	0.632627	0.0732185
9	A9	15	62.9092	0.626427	0.0743662
9	A9	16	63.1056	0.623186	0.0752869
9	A9	17	63.302	0.617949	0.0760981
9	A9	18	63.4984	0.612631	0.0769171
9	A9	19	63.6948	0.608208	0.0778168
9	A9	20	63.8912	0.603221	0.0787917
9	A9	21	64.0876	0.597929	0.0797524
9	A9	22	64.284	0.593168	0.0805574
9	A9	23	64.4805	0.587579	0.0810805
9	A9	24	64.6769	0.581255	0.0812849
9	A9	25	64.8733	0.576181	0.0812614
9	A9	26	65.0697	0.571109	0.0812
9	A9	27	65.2661	0.565955	0.0813061
9	A9	28	65.4625	0.561696	0.0817103
9	A9	29	65.6589	0.556332	0.0824196
9	A9	30	65.8553	0.550356	0.083333
9	A9	31	66.0518	0.545055	0.0842989
9	A9	32	66.2482	0.539974	0.0851774
9	A9	33	66.4446	0.534252	0.0858868
9	A9	34	66.641	0.528147	0.0864198
9	A9	35	66.8374	0.522242	0.0868435
9	A9	36	67.0338	0.517011	0.0872638
9	A9	37	67.2302	0.511659	0.08778
9	A9	38	67.4266	0.505817	0.088425
9	A9	39	67.623	0.500011	0.0891284
9	A9	40	67.8195	0.494743	0.0897124
9	A9	41	68.0159	0.488333	0.0899379
9	A9	42	68.2123	0.482337	0.0895876
9	A9	43	68.4087	0.47579	0.0885535
9	A9	44	68.6051	0.469035	0.0868848
9	A9	45	68.8015	0.46412	0.0847688
9	A9	46	68.9979	0.459534	0.0824577
9	A9	47	69.1943	0.45415	0.0801856
9	A9	48	69.3908	0.449272	0.0781231
9	A9	49	69.5872	0.443262	0.0763734
9	A9	50	69.7836	0.439539	0.0749856
9	A9	51	69.98	0.434745	0.0739604
9	A9	52	70.1764	0.430576	0.0732488
9	A9	53	70.3728	0.4255	0.0727682
9	A9	54	70.5692	0.4201	0.0724358
9	A9	55	70.7656	0.415827	0.0722015
9	A9	56	70.9621	0.41111	0.072055
9	A9	57	71.1585	0.407215	0.0720087
9	A9	58	71.3549	0.401514	0.0720709
9	A9	59	71.5513	0.397003	0.0722357
9	A9	60	71.7477	0.393092	0.0724897
9	A9	61	71.9441	0.387843	0.0728326
9	A9	62	72.1405	0.383191	0.0732965
9	A9	63	72.3369	0.37844	0.0739509
9	A9	64	72.5333	0.373922	0.0748938
9	A9	65	72.7298	0.369322	0.0762342
9	A9	66	72.9262	0.364829	0.0780836
9	A9	67	73.1226	0.359084	0.0805655
9	A9	68	73.319	0.354629	0.0838432
9	A9	69	73.5154	0.34817	0.0881461
9	A9	70	73.7118	0.344148	0.0937773
9	A9	71	73.9082	0.336707	0.101089
9	A9	72	74.1046	0.331802	0.110429
9	A9	73	74.301	0.324211	0.122078
9	A9	74	74.4975	0.31726	0.136174
9	A9	75	74.6939	0.307823	0.152656
9	A9	76	74.8903	0.298731	0.171215
9	A9	77	75.0867	0.286181	0.191258
9	A9	78	75.2831	0.273541	0.211914
9	A9	79	75.4795	0.259721	0.232093
9	A9	80	75.6759	0.241617	0.250613
9	A9	81	75.8723	0.22326	0.266386
9	A9	82	76.0688	0.204783	0.278603
9	A9	83	76.2652	0.184004	0.286842
9	A9	84	76.4616	0.163858	0.291074
9	A9	85	76.658	0.143857	0.291543
9	A9	86	76.8544	0.124277	0.288583
9	A9	87	77.0508	0.105699	0.282428
9	A9	88	77.2472	0.0868618	0.27312
9	A9	89	77.4436	0.0681373	0.260538
9	A9	90	77.6401	0.0509712	0.244547
9	A9	91	77.8365	0.0343742	0.225204
9	A9	92	78.0329	0.0193702	0.202927
9	A9	93	78.2293	0.00677046	0.178556
9	A9	94	78.4257	-0.00256795	0.153267
9	A9	95	78.6221	-0.0111746	0.128376
9	A9	96	78.8185	-0.0162556	0.105091
9	A9	97	79.0149	-0.0206186	0.0843133
9	A9	98	79.2113	-0.0238576	0.066534
9	A9	99	79.4078	-0.0265021	0.0518582
9	A9	100	79.6042	-0.0290204	0.0401098
9	A9	101	79.8006	-0.0299386	0.0309547
9	A9	102	79.997	-0.0310336	0.0239943
9	A9	103	80.1934	-0.0318064	0.0188132
9	A9	104	80.3898	-0.0323121	0.0150043
9	A9	105	80.5862	-0.0332863	0.0121935
9	A9	106	80.7826	-0.0339203	0.0100722
9	A9	107	80.979	-0.0348664	0.00841868
9	A9	108	81.1755	-0.0343628	0.00709691
9	A9	109	81.3719	-0.0350631	0.00603344
9	A9	110	81.5683	-0.0352952	0.00519013
9	A9	111	81.7647	-0.0357968	0.00454595
9	A9	112	81.9611	-0.0360693	0.00408614
9	A9	113	82.1575	-0.0359279	0.00379047
9	A9	114	82.3539	-0.0358546	0.00362055
9	A9	115	82.5503	-0.0364905	0.00351743
9	A9	116	82.7468	-0.0366573	0.0034171
9	A9	117	82.9432	-0.0373217	0.00327521
9	A9	118	83.1396	-0.0370763	0.00308246
9	A9	119	83.336	-0.0375468	0.00285892
9	A9	120	83.5324	-0.0370332	0.00263479
9	A9	121	83.7288	-0.0377697	0.00243389
9	A9	122	83.9252	-0.0382596	0.0022695
9	A9	123	84.1216	-0.0374915	0.00214803
9	A9	124	84.3181	-0.0383402	0.0020713
9	A9	125	84.5145	-0.0377935	0.00203518
9	A9	126	84.7109	-0.038504	0.00202948
9	A9	127	84.9073	-0.038504	0.00204315
9	A9	128	85.1037	-0.0382151	0.00207117
9	A9	129	85.3001	-0.0393621	0.00211608
9	A9	130	85.4965	-0.0382064	0.00218138
9	A9	131	85.6929	-0.039034	0.00226159
9	A9	132	85.8893	-0.0391762	0.0023365
9	A9	133	86.0858	-0.0394428	0.00237417
9	A9	134	86.2822	-0.0392401	0.00234224
9	A9	135	86.4786	-0.0395466	0.00222304
9	A9	136	86.675	-0.0399713	0.00202626
9	A9	137	86.8714	-0.0404511	0.00179154
9	A9	138	87.0678	-0.0395645	0.00157665
9	A9	139	87.2642	-0.0400111	0.00143521
9	A9	140	87.4606	-0.040034	0.00139562
9	A9	141	87.6571	-0.0403628	0.0014515
9	A9	142	87.8535	-0.0400613	0.00156592
9	A9	143	88.0499	-0.0404347	0.00168419
9	A9	144	88.2463	-0.0402258	0.00175024
9	A9	145	88.4427	-0.041104	0.00172431
9	A9	146	88.6391	-0.0405924	0.00159884
9	A9	147	88.8355	-0.0411988	0.00140548
9	A9	148	89.0319	-0.0410211	0.0012064
9	A9	149	89.2283	-0.0409396	0.00107051
9	A9	150	89.4248	-0.040789	0.00104453
9	A9	151	89.6212	-0.0414136	0.00113343
9	A9	152	89.8176	-0.0407649	0.00129973
9	A9	153	90.014	-0.0416102	0.00148158
9	A9	154	90.2104	-0.0413498	0.00162005
9	A9	155	90.4068	-0.0418235	0.00168193
9	A9	156	90.6032	-0.0417989	0.00166722
9	A9	157	90.7996	-0.0417594	0.00159919
9	A9	158	90.9961	-0.0415467	0.00150625
9	A9	159	91.1925	-0.0424899	0.00140941
9	A9	160	91.3889	-0.0416876	0.00132302
9	A9	161	91.5853	-0.0426152	0.00126279
9	A9	162	91.7817	-0.0420144	0.00124792
9	A9	163	91.9781	-0.0420063	0.00129073
9	A9	164	92.1745	-0.042367	0.00138109
9	A9	165	92.3709	-0.0428176	0.00148004
9	A9	166	92.5674	-0.042115	0.00153044
9	A9	167	92.7638	-0.0430886	0.00148051
9	A9	168	92.9602	-0.0430429	0.00130826
9	A9	169	93.1566	-0.0426649	0.00103597
9	A9	170	93.353	-0.043316	0.000728378
9	A9	171	93.5494	-0.0428822	0.000473716
9	A9	172	93.7458	-0.0425606	0.000352085
9	A9	173	93.9422	-0.0427742	0.000401667
9	A9	174	94.1386	-0.0430776	0.000596898
9	A9	175	94.3351	-0.0424409	0.00085133
9	A9	176	94.5315	-0.0431316	0.00104926
9	A9	177	94.7279	-0.0436608	0.00109563
9	A9	178	94.9243	-0.0439046	0.000959842
10	A10	1	60.1594	0.552978	0.0601582
10	A10	2	60.3558	0.547442	0.0598515
10	A10	3	60.5522	0.543107	0.0594182
10	A10	4	60.7486	0.540702	0.0589855
10	A10	5	60.945	0.536306	0.0586995
10	A10	6	61.1415	0.531606	0.058657
10	A10	7	61.3379	0.526577	0.0588739
10	A10	8	61.5343	0.522816	0.0592991
10	A10	9	61.7307	0.518429	0.059857
10	A10	10	61.9271	0.513517	0.0604766
10	A10	11	62.1235	0.508371	0.0611095
10	A10	12	62.3199	0.504139	0.0617216
10	A10	13	62.5163	0.499779	0.0622779
10	A10	14	62.7128	0.494594	0.0627341
10	A10	15	62.9092	0.489795	0.0630446
10	A10	16	63.1056	0.484807	0.063184
10	A10	17	63.302	0.480074	0.0631661
10	A10	18	63.4984	0.475174	0.0630423
10	A10	19	63.6948	0.470527	0.0628832
10	A10	20	63.8912	0.465624	0.0627464
10	A10	21	64.0876	0.462166	0.0626587
10	A10	22	64.284	0.455295	0.0626135
10	A10	23	64.4805	0.452054	0.0625817
10	A10	24	64.6769	0.446569	0.0625268
10	A10	25	64.8733	0.442477	0.0624144
10	A10	26	65.0697	0.436684	0.0622196
10	A10	27	65.2661	0.432704	0.061932
10	A10	28	65.4625	0.427917	0.0615632
10	A10	29	65.6589	0.422914	0.0611478
10	A10	30	65.8553	0.417949	0.0607334
10	A10	31	66.0518	0.414319	0.0603615
10	A10	32	66.2482	0.409575	0.0600522
10	A10	33	66.4446	0.405025	0.0598038
10	A10	34	66.641	0.400122	0.0596071
10	A10	35	66.8374	0.395686	0.0594585
10	A10	36	67.0338	0.390709	0.0593561
10	A10	37	67.2302	0.386835	0.059284
10	A10	38	67.4266	0.383486	0.0591995
10	A10	39	67.623	0.377224	0.0590477
10	A10	40	67.8195	0.37236	0.0587899
10	A10	41	68.0159	0.368517	0.0584272
10	A10	42	68.2123	0.364678	0.0580003
10	A10	43	68.4087	0.359557	0.0575691
10	A10	44	68.6051	0.354699	0.0571879
10	A10	45	68.8015	0.35069	0.0568808
10	A10	46	68.9979	0.347438	0.0566265
10	A10	47	69.1943	0.342772	0.0563603
10	A10	48	69.3908	0.338243	0.0559984
10	A10	49	69.5872	0.33288	0.0554846
10	A10	50	69.7836	0.330264	0.0548275
10	A10	51	69.98	0.324772	0.0541081
10	A10	52	70.1764	0.321064	0.0534463
10	A10	53	70.3728	0.317555	0.0529489
10	A10	54	70.5692	0.313789	0.0526671
10	A10	55	70.7656	0.309923	0.0525908
10	A10	56	70.9621	0.30503	0.0526715
10	A10	57	71.1585	0.301189	0.0528576
10	A10	58	71.3549	0.297644	0.0531119
10	A10	59	71.5513	0.293447	0.0534105
10	A10	60	71.7477	0.289382	0.0537355
10	A10	61	71.9441	0.284949	0.054077
10	A10	62	72.1405	0.281495	0.0544548
10	A10	63	72.3369	0.276423	0.0549369
10	A10	64	72.5333	0.272998	0.0556422
10	A10	65	72.7298	0.268585	0.0567254
10	A10	66	72.9262	0.264733	0.0583538
10	A10	67	73.1226	0.261124	0.0607028
10	A10	68	73.319	0.255343	0.0639737
10	A10	69	73.5154	0.251263	0.0684276
10	A10	70	73.7118	0.245583	0.0743995
10	A10	71	73.9082	0.241029	0.0822712
10	A10	72	74.1046	0.234976	0.0924041
10	A10	73	74.301	0.229277	0.105049
10	A10	74	74.4975	0.219986	0.12026
10	A10	75	74.6939	0.211772	0.137812
10	A10	76	74.8903	0.201405	0.157137
10	A10	77	75.0867	0.188369	0.177279
10	A10	78	75.2831	0.17342	0.196898
10	A10	79	75.4795	0.156682	0.21436
10	A10	80	75.6759	0.137581	0.227915
10	A10	81	75.8723	0.116871	0.235955
10	A10	82	76.0688	0.0958668	0.237304
10	A10	83	76.2652	0.0737828	0.231458
10	A10	84	76.4616	0.0533059	0.218715
10	A10	85	76.658	0.0363854	0.200135
10	A10	86	76.8544	0.0216991	0.177355
10	A10	87	77.0508	0.00872642	0.152301
10	A10	88	77.2472	-0.000503481	0.126888
10	A10	89	77.4436	-0.00661064	0.102759
10	A10	90	77.6401	-0.0117032	0.0811282
10	A10	91	77.8365	-0.0156169	0.0627133
10	A10	92	78.0329	-0.017596	0.0477605
10	A10	93	78.2293	-0.0195389	0.0361313
10	A10	94	78.4257	-0.0208597	0.0274186
10	A10	95	78.6221	-0.0215842	0.0210713
10	A10	96	78.8185	-0.0229377	0.0165097
10	A10	97	79.0149	-0.0235815	0.0132211
10	A10	98	79.2113	-0.0249441	0.0108193
10	A10	99	79.4078	-0.0251591	0.00905669
10	A10	100	79.6042	-0.0253824	0.00779152
10	A10	101	79.8006	-0.0256825	0.00693272
10	A10	102	79.997	-0.0262788	0.00639375
10	A10	103	80.1934	-0.0268218	0.00607631
10	A10	104	80.3898	-0.0267583	0.00588248
10	A10	105	80.5862	-0.0282582	0.00573523
10	A10	106	80.7826	-0.0281251	0.00558778
10	A10	107	80.979	-0.0280577	0.0054171
10	A10	108	81.1755	-0.0289107	0.00521242
10	A10	109	81.3719	-0.0292876	0.00497099
10	A10	110	81.5683	-0.0301785	0.00470149
10	A10	111	81.7647	-0.0298818	0.00442384
10	A10	112	81.9611	-0.0301592	0.00415789
10	A10	113	82.1575	-0.0307028	0.00390766
10	A10	114	82.3539	-0.0304986	0.00365697
10	A10	115	82.5503	-0.0313246	0.00338411
10	A10	116	82.7468	-0.0316782	0.00308541
10	A10	117	82.9432	-0.0319073	0.00278731
10	A10	118	83.1396	-0.0316441	0.0025356
10	A10	119	83.336	-0.0316183	0.00236944
10	A10	120	83.5324	-0.0320708	0.00230009
10	A10	121	83.7288	-0.0323215	0.00230834
10	A10	122	83.9252	-0.0324578	0.00235912
10	A10	123	84.1216	-0.0323572	0.00242024
10	A10	124	84.3181	-0.032756	0.00247269
10	A10	125	84.5145	-0.0336118	0.00250936
10	A10	126	84.7109	-0.0325927	0.00252724
10	A10	127	84.9073	-0.0332644	0.00252209
10	A10	128	85.1037	-0.0336801	0.00248992
10	A10	129	85.3001	-0.0344532	0.0024326
10	A10	130	85.4965	-0.0333928	0.00235991
10	A10	131	85.6929	-0.0341445	0.00228481
10	A10	132	85.8893	-0.0342213	0.00221668
10	A10	133	86.0858	-0.0348615	0.00215906
10	A10	134	86.2822	-0.0343065	0.00211323
10	A10	135	86.4786	-0.0349326	0.00208229
10	A10	136	86.675	-0.0346998	0.00207142
10	A10	137	86.8714	-0.0353225	0.00208455
10	A10	138	87.0678	-0.0349489	0.00212049
10	A10	139	87.2642	-0.0355943	0.00217029
10	A10	140	87.4606	-0.0353607	0.00221646
10	A10	141	87.6571	-0.0357915	0.00223569
10	A10	142	87.8535	-0.0358457	0.00220615
10	A10	143	88.0499	-0.036173	0.00211773
10	A10	144	88.2463	-0.036474	0.00197875
10	A10	145	88.4427	-0.0366705	0.00181331
10	A10	146	88.6391	-0.0361188	0.00165043
10	A10	147	88.8355	-0.0365214	0.00151264
10	A10	148	89.0319	-0.0371071	0.001412
10	A10	149	89.2283	-0.0367821	0.00135368
10	A10	150	89.4248	-0.0366482	0.00134116
10	A10	151	89.6212	-0.0372198	0.00137695
10	A10	152	89.8176	-0.037362	0.00145805
10	A10	153	90.014	-0.0370478	0.00156912
10	A10	154	90.2104	-0.0371652	0.00167896
10	A10	155	90.4068	-0.0376698	0.00174607
10	A10	156	90.6032	-0.0381554	0.00173583
10	A10	157	90.7996	-0.0376734	0.00164218
10	A10	158	90.9961	-0.0382162	0.00149813
10	A10	159	91.1925	-0.0383634	0.00136154
10	A10	160	91.3889	-0.03762	0.00127956
10	A10	161	91.5853	-0.0377573	0.00125476
10	A10	162	91.7817	-0.0386056	0.00124057
10	A10	163	91.9781	-0.0386613	0.00117434
10	A10	164	92.1745	-0.0389654	0.00102608
10	A10	165	92.3709	-0.0386778	0.000825298
10	A10	166	92.5674	-0.0378789	0.000644221
10	A10	167	92.7638	-0.0390051	0.000550047
10	A10	168	92.9602	-0.0384131	0.000562837
10	A10	169	93.1566	-0.0381622	0.000649243
10	A10	170	93.353	-0.0392518	0.00075335
10	A10	171	93.5494	-0.0393069	0.000838136
10	A10	172	93.7458	-0.0386136	0.000904777
10	A10	173	93.9422	-0.0387642	0.000976001
10	A10	174	94.1386	-0.0388097	0.00105964
10	A10	175	94.3351	-0.0390969	0.00112576
10	A10	176	94.5315	-0.039533	0.00111935
10	A10	177	94.7279	-0.0397554	0.000999377
10	A10	178	94.9243	-0.0395812	0.000772152
11	A11	1	60.1594	0.535965	0.0604262
11	A11	2	60.3558	0.530963	0.0605602
11	A11	3	60.5522	0.527365	0.0606004
11	A11	4	60.7486	0.5231	0.0605418
11	A11	5	60.945	0.517606	0.0604231
11	A11	6	61.1415	0.513868	0.0602933
11	A11	7	61.3379	0.509534	0.0601845
11	A11	8	61.5343	0.504128	0.0601169
11	A11	9	61.7307	0.499586	0.0601194
11	A11	10	61.9271	0.494245	0.0602436
11	A11	11	62.1235	0.490579	0.060539
11	A11	12	62.3199	0.486757	0.0610136
11	A11	13	62.5163	0.480836	0.0616075
11	A11	14	62.7128	0.477011	0.0622117
11	A11	15	62.9092	0.47106	0.0627151
11	A11	16	63.1056	0.466537	0.0630522
11	A11	17	63.302	0.461339	0.0632153
11	A11	18	63.4984	0.457551	0.0632367
11	A11	19	63.6948	0.451609	0.0631528
11	A11	20	63.8912	0.447281	0.0629806
11	A11	21	64.0876	0.442477	0.062713
11	A11	22	64.284	0.436869	0.0623352
11	A11	23	64.4805	0.433555	0.0618508
11	A11	24	64.6769	0.426919	0.0613046
11	A11	25	64.8733	0.42242	0.0607832
11	A11	26	65.0697	0.419353	0.0603905
11	A11	27	65.2661	0.413254	0.0601952
11	A11	28	65.4625	0.409691	0.060191
11	A11	29	65.6589	0.40556	0.0602882
11	A11	30	65.8553	0.40041	0.0603552
11	A11	31	66.0518	0.394855	0.0602883
11	A11	32	66.2482	0.390724	0.0600644
11	A11	33	66.4446	0.385605	0.0597405
11	A11	34	66.641	0.381089	0.0594022
11	A11	35	66.8374	0.377853	0.0590935
11	A11	36	67.0338	0.372296	0.0587841
11	A11	37	67.2302	0.368418	0.0583952
11	A11	38	67.4266	0.362297	0.0578647
11	A11	39	67.623	0.358916	0.057199
11	A11	40	67.8195	0.353523	0.0564765
11	A11	41	68.0159	0.350395	0.0558022
11	A11	42	68.2123	0.346187	0.0552542
11	A11	43	68.4087	0.341567	0.0548544
11	A11	44	68.6051	0.336933	0.0545774
11	A11	45	68.8015	0.332918	0.0543749
11	A11	46	68.9979	0.329392	0.0541971
11	A11	47	69.1943	0.32524	0.0540031
11	A11	48	69.3908	0.320206	0.0537683
11	A11	49	69.5872	0.316371	0.0534935
11	A11	50	69.7836	0.312511	0.0532058
11	A11	51	69.98	0.308001	0.0529496
11	A11	52	70.1764	0.304732	0.0527676
11	A11	53	70.3728	0.30026	0.0526854
11	A11	54	70.5692	0.295833	0.0526999
11	A11	55	70.7656	0.292329	0.0527784
11	A11	56	70.9621	0.288224	0.0528626
11	A11	57	71.1585	0.283995	0.0528872
11	A11	58	71.3549	0.27982	0.0528062
11	A11	59	71.5513	0.274796	0.052621
11	A11	60	71.7477	0.27155	0.052389
11	A11	61	71.9441	0.267689	0.0522089
11	A11	62	72.1405	0.263622	0.0521961
11	A11	63	72.3369	0.260103	0.0524632
11	A11	64	72.5333	0.255221	0.0531196
11	A11	65	72.7298	0.25238	0.0542808
11	A11	66	72.9262	0.24799	0.0560811
11	A11	67	73.1226	0.243728	0.0586805
11	A11	68	73.319	0.239135	0.0622645
11	A11	69	73.5154	0.235204	0.0670435
11	A11	70	73.7118	0.229702	0.0732541
11	A11	71	73.9082	0.224502	0.0811566
11	A11	72	74.1046	0.217926	0.0910227
11	A11	73	74.301	0.211684	0.103096
11	A11	74	74.4975	0.204133	0.117521
11	A11	75	74.6939	0.194919	0.134236
11	A11	76	74.8903	0.184437	0.152858
11	A11	77	75.0867	0.172597	0.172583
11	A11	78	75.2831	0.158426	0.192147
11	A11	79	75.4795	0.141326	0.209904
11	A11	80	75.6759	0.122891	0.224015
11	A11	81	75.8723	0.101194	0.232743
11	A11	82	76.0688	0.0804326	0.234772
11	A11	83	76.2652	0.0585379	0.229479
11	A11	84	76.4616	0.038479	0.217069
11	A11	85	76.658	0.0197798	0.198565
11	A11	86	76.8544	0.004559	0.175636
11	A11	87	77.0508	-0.00679469	0.150298
11	A11	88	77.2472	-0.0164536	0.124584
11	A11	89	77.4436	-0.0226078	0.100234
11	A11	90	77.6401	-0.0275048	0.078499
11	A11	91	77.8365	-0.0307378	0.0600732
11	A11	92	78.0329	-0.0325952	0.0451487
11	A11	93	78.2293	-0.0349441	0.0335464
11	A11	94	78.4257	-0.0364885	0.0248634
11	A11	95	78.6221	-0.0364478	0.018593
11	A11	96	78.8185	-0.0370199	0.0142031
11	A11	97	79.0149	-0.0380004	0.0111871
11	A11	98	79.2113	-0.038576	0.00910581
11	A11	99	79.4078	-0.0395444	0.00762386
11	A11	100	79.6042	-0.0397965	0.00652521
11	A11	101	79.8006	-0.0400365	0.00569725
11	A11	102	79.997	-0.0403893	0.00508996
11	A11	103	80.1934	-0.0402249	0.00467369
11	A11	104	80.3898	-0.0412624	0.00441563
11	A11	105	80.5862	-0.0414066	0.00427723
11	A11	106	80.7826	-0.0412592	0.00421963
11	A11	107	80.979	-0.0423491	0.0042048
11	A11	108	81.1755	-0.0418576	0.00419183
11	A11	109	81.3719	-0.0424087	0.00413728
11	A11	110	81.5683	-0.043185	0.00400578
11	A11	111	81.7647	-0.0434345	0.00378545
11	A11	112	81.9611	-0.0436018	0.00349502
11	A11	113	82.1575	-0.0439393	0.00317411
11	A11	114	82.3539	-0.0437064	0.00286173
11	A11	115	82.5503	-0.0444281	0.00257776
11	A11	116	82.7468	-0.0440632	0.00232007
11	A11	117	82.9432	-0.0445898	0.00207781
11	A11	118	83.1396	-0.0449118	0.00184929
11	A11	119	83.336	-0.0450014	0.00165072
11	A11	120	83.5324	-0.0444201	0.00150987
11	A11	121	83.7288	-0.0450936	0.00144987
11	A11	122	83.9252	-0.0452349	0.00147422
11	A11	123	84.1216	-0.0447757	0.00156179
11	A11	124	84.3181	-0.0452465	0.00167406
11	A11	125	84.5145	-0.0454163	0.00177013
11	A11	126	84.7109	-0.045843	0.0018215
11	A11	127	84.9073	-0.0457325	0.00181896
11	A11	128	85.1037	-0.0459405	0.00177033
11	A11	129	85.3001	-0.0456859	0.00169411
11	A11	130	85.4965	-0.0463326	0.0016145
11	A11	131	85.6929	-0.0467429	0.00155671
11	A11	132	85.8893	-0.0462626	0.0015376
11	A11	133	86.0858	-0.0459458	0.00155214
11	A11	134	86.2822	-0.046476	0.00156733
11	A11	135	86.4786	-0.0470371	0.00153536
11	A11	136	86.675	-0.0467934	0.00142303
11	A11	137	86.8714	-0.0472989	0.00123756
11	A11	138	87.0678	-0.047523	0.0010281
11	A11	139	87.2642	-0.0465692	0.000859728
11	A11	140	87.4606	-0.0471647	0.000778131
11	A11	141	87.6571	-0.0470725	0.00078851
11	A11	142	87.8535	-0.0471396	0.000859972
11	A11	143	88.0499	-0.047437	0.000947413
11	A11	144	88.2463	-0.0474509	0.00101353
11	A11	145	88.4427	-0.0474811	0.00103919
11	A11	146	88.6391	-0.0475901	0.00102262
11	A11	147	88.8355	-0.0473448	0.00097482
11	A11	148	89.0319	-0.0483091	0.000915182
11	A11	149	89.2283	-0.0475305	0.000865822
11	A11	150	89.4248	-0.0475646	0.000843116
11	A11	151	89.6212	-0.048116	0.000850666
11	A11	152	89.8176	-0.0480251	0.000879193
11	A11	153	90.014	-0.0484789	0.000912237
11	A11	154	90.2104	-0.0475557	0.000930776
11	A11	155	90.4068	-0.0484313	0.000913893
11	A11	156	90.6032	-0.0483863	0.000841791
11	A11	157	90.7996	-0.0484757	0.000707987
11	A11	158	90.9961	-0.048616	0.000535688
11	A11	159	91.1925	-0.0487667	0.000382355
11	A11	160	91.3889	-0.0478098	0.000320975
11	A11	161	91.5853	-0.0482853	0.00040426
11	A11	162	91.7817	-0.0485124	0.000632688
11	A11	163	91.9781	-0.0482801	0.000946025
11	A11	164	92.1745	-0.0486052	0.00124403
11	A11	165	92.3709	-0.0489334	0.00142722
11	A11	166	92.5674	-0.04927	0.00143995
11	A11	167	92.7638	-0.0494719	0.00129593
11	A11	168	92.9602	-0.0493	0.00107083
11	A11	169	93.1566	-0.0488288	0.000861764
11	A11	170	93.353	-0.0487599	0.000734595
11	A11	171	93.5494	-0.0494791	0.000691841
11	A11	172	93.7458	-0.049241	0.000682005
11	A11	173	93.9422	-0.0497655	0.000641483
11	A11	174	94.1386	-0.0496053	0.000537235
11	A11	175	94.3351	-0.0491204	0.000381755
11	A11	176	94.5315	-0.049635	0.000216518
11	A11	177	94.7279	-0.0494464	8.26087e-05
11	A11	178	94.9243	-0.049293	4.01345e-07
12	A12	1	60.1594	0.735859	0.0812697
12	A12	2	60.3558	0.731195	0.0816501
12	A12	3	60.5522	0.729131	0.0813241
12	A12	4	60.7486	0.723593	0.0801913
12	A12	5	60.945	0.720769	0.07848
12	A12	6	61.1415	0.716665	0.0766693
[truncated: 15,124 more rows]
